# Supplementary material for: Phosphine catalyzed δ-carbon addition and isomerization of alkynones to ketimines: the preparation of 1,3-diene substituted dihydroquinazolinones and 3-aminooxindoles
Source: Royal Society of Chemistry journal article supplement (doi:10.1039/c7qo00772h), 2017-09-28
Supplement: c7qo00772h1.pdf [file c7qo00772h1.pdf]

## Supporting Information

### **Phosphine Catalyzed $\delta$ -Carbon Addition and Isomerization of Alkynones to Ketimines: Preparation of 1,3-Dienes Substituted Dihydroquinazolinones and 3-aminooxindoles**

*Yao-Liang Sun,<sup>a</sup> Yin Wei,<sup>\*b</sup> Min Shi<sup>a,b,c\*</sup>*

*<sup>a</sup>Key Laboratory for Advanced Materials and Institute of Fine Chemicals, East China University of Science and Technology, 130 Meilong Road, Shanghai 200237, China*

*<sup>b</sup>State Key Laboratory of Organometallic Chemistry, Shanghai Institute of Organic Chemistry, Chinese Academy of Sciences, 345 Ling-Ling Lu, Shanghai, 200032, China.*

*weiyin@sioc.ac.cn, mshi@sioc.ac.cn. Fax 86-21-64166128*

*<sup>c</sup>State Key Laboratory and Institute of Elemento-organic Chemistry, Nankai University, Tianjin 300071, P. R. China.*

## CONTENTS

|                                                                                                                                                                       |     |
|-----------------------------------------------------------------------------------------------------------------------------------------------------------------------|-----|
| 1. General Remarks.....                                                                                                                                               | S3  |
| 2. General Procedure for Synthesis of Cyclic Ketimines <b>2</b> and Spectroscopic Data of the Products.....                                                           | S4  |
| 3. General Procedure for Hex-3-yn-2-one <b>1a</b> to Cyclic Trifluoromethyl Ketimines <b>2</b> and Spectroscopic Data of the Products.....                            | S12 |
| 4. Optimal Conditions for the Synthesis of <b>5a</b> .....                                                                                                            | S28 |
| 5. General Procedure for Hex-3-yn-2-one <b>1a</b> to Isatin-derived N-Boc Ketimines <b>4</b> and Spectroscopic Data of the Products.....                              | S29 |
| 6. Optimal Conditions for the Synthesis of <b>7a</b> .....                                                                                                            | S38 |
| 7. General Procedure for Hex-3-yn-2-one <b>1a</b> to N-tosyl $\alpha$ -Ketimine Esters <b>6a</b> and Spectroscopic Data of the Products.....                          | S38 |
| 8. Screening of Chiral Phosphine Catalysts of $\delta$ -Carbon Activation of Hex-3-yn-2-one <b>1a</b> and Addition to Cyclic Trifluoromethyl Ketimine <b>2a</b> ..... | S40 |
| 9. General Procedure for Alkynones <b>1</b> to Cyclic Trifluoromethyl Ketimines <b>2a</b> and Spectroscopic Data of the Products.....                                 | S41 |
| 10. Control Experiments and Spectroscopic Data of the Products.....                                                                                                   | S45 |
| 11. Large-scale Testing and Transformations of Product <b>3a</b> .....                                                                                                | S48 |
| 12. X-ray Crystal Data of <b>3a</b> and <b>5a</b> .....                                                                                                               | S58 |
| 13. Reference.....                                                                                                                                                    | S60 |

**General Remarks.**  $^1\text{H}$  NMR spectra were recorded on a Varian Mercury-300 and 400 spectrometer for solution in  $\text{CDCl}_3$  with tetramethylsilane (TMS) as an internal standard; coupling constants  $J$  are given in Hz.  $^{13}\text{C}$  NMR spectra were recorded on a Varian Mercury-300 and 400 spectrophotometers (75 or 100 MHz) with complete proton decoupling spectrophotometers ( $\text{CDCl}_3$ : 77.0 ppm). Mass and HRMS spectra were recorded by EI or ESI method. Organic solvents used were dried by standard methods when necessary. Infrared spectra were recorded on a Perkin-Elmer PE-983 spectrometer with absorption in  $\text{cm}^{-1}$ . Melting points were determined on a digital melting point apparatus and temperatures were uncorrected. Commercially obtained reagents were used without further purification. All these reactions were monitored by TLC with silica gel coated plates. Flash column chromatography was carried out using silica gel at increased pressure.

Compound **1a** was commercially available compound. Compounds **1b-1d** are known compounds and prepared according to the previous literature.<sup>[1]</sup>

Compounds **4a-4g**, **6a**, and **8a** are known compounds and prepared according to the previous literature.<sup>[2]</sup>

## General Procedure for Synthesis of Cyclic Ketimines **2** and Spectroscopic Data of the Products

Cyclic ketimines **2** were prepared according to a reported procedure in the previous literature.<sup>[3]</sup> Among them, **2a-2d** are known compounds.

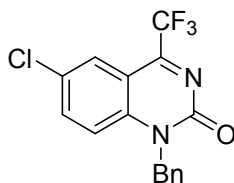

### 1-benzyl-6-chloro-4-(trifluoromethyl)quinazolin-2(1H)-one (**2e**).

A yellow solid, 54% yield. M.p.: 154-156 °C. <sup>1</sup>H NMR (CDCl<sub>3</sub>, TMS, 400 MHz) δ, 5.54 (s, 2H, CH<sub>2</sub>), 7.23-7.36 (m, 6H, ArH), 7.67 (d, *J* = 8.8 Hz, 1H, ArH), 7.98 (s, 1H, ArH). <sup>13</sup>C NMR (CDCl<sub>3</sub>, TMS, 100 MHz) δ 48.26, 112.7, 115.3, 119.5 (q, *J* = 278.1 Hz), 126.0 (d, *J* = 3.1 Hz), 126.6, 128.1, 129.1, 129.2, 134.2, 136.9, 142.9, 153.9, 159.8 (q, *J* = 35.6 Hz). <sup>19</sup>F NMR (376 MHz, CDCl<sub>3</sub>, CFCl<sub>3</sub>) δ -66.13. IR (CH<sub>2</sub>Cl<sub>2</sub>) ν 2955, 2923, 2851, 1681, 1622, 1555, 1221, 1200, 1142, 974, 734 cm<sup>-1</sup>. MS (ESI) *m/z* (%): 339.1 (100) [M+H]<sup>+</sup>; HRMS (ESI) Calcd. For C<sub>16</sub>H<sub>11</sub>ClF<sub>3</sub>N<sub>2</sub>O<sup>+</sup>(M+H)<sup>+</sup> requires 339.0507, Found: 339.0505.

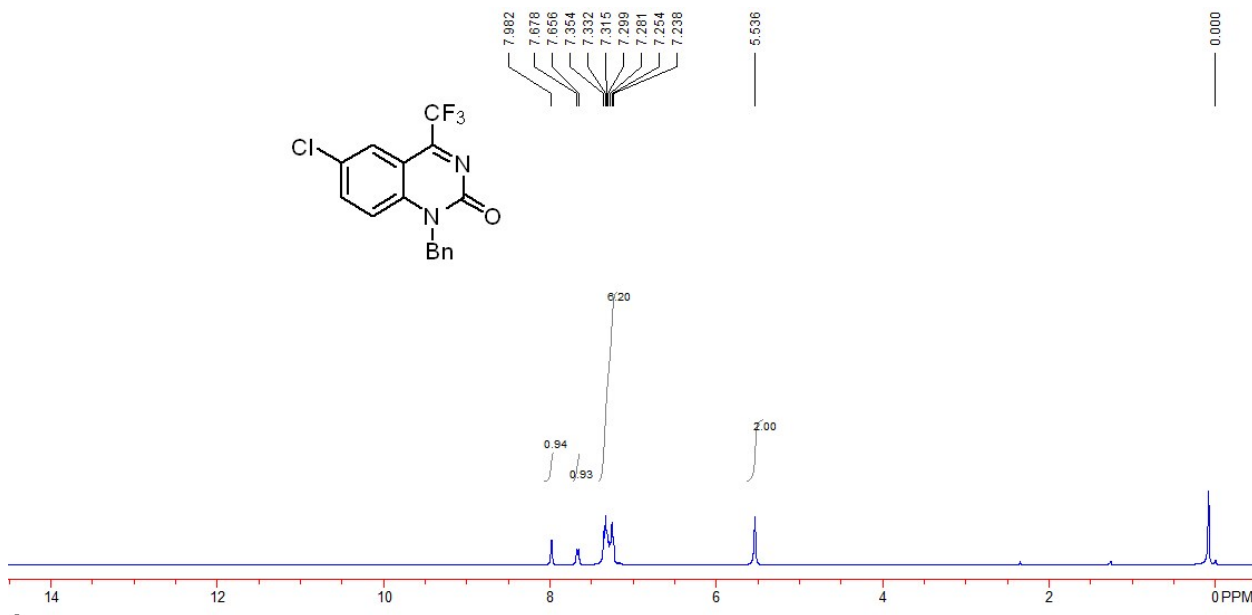

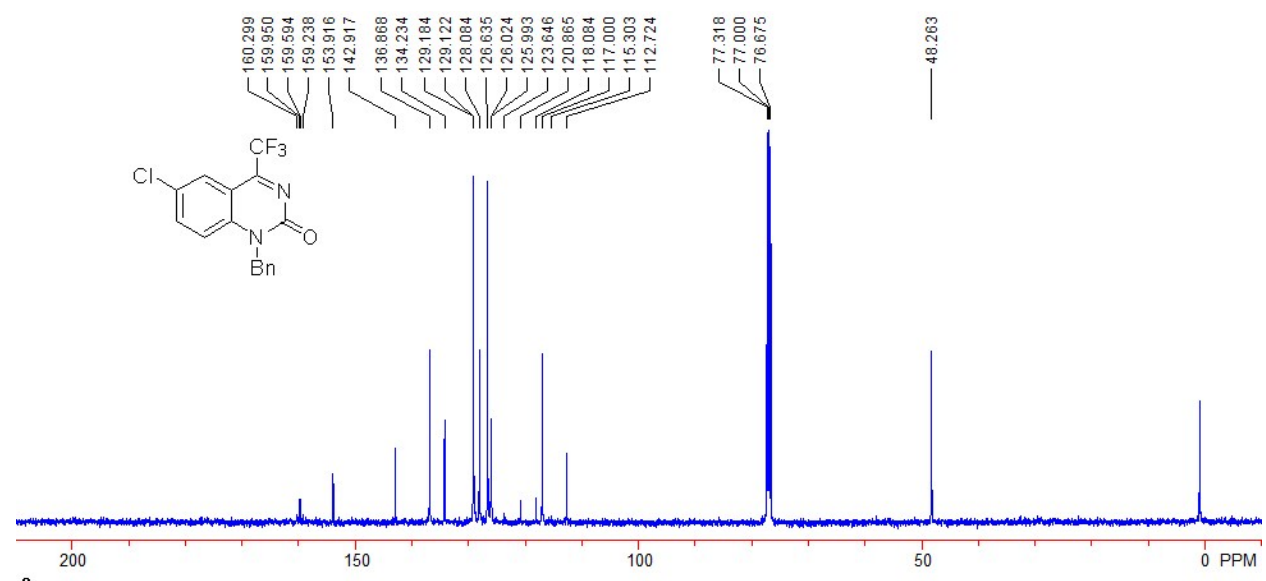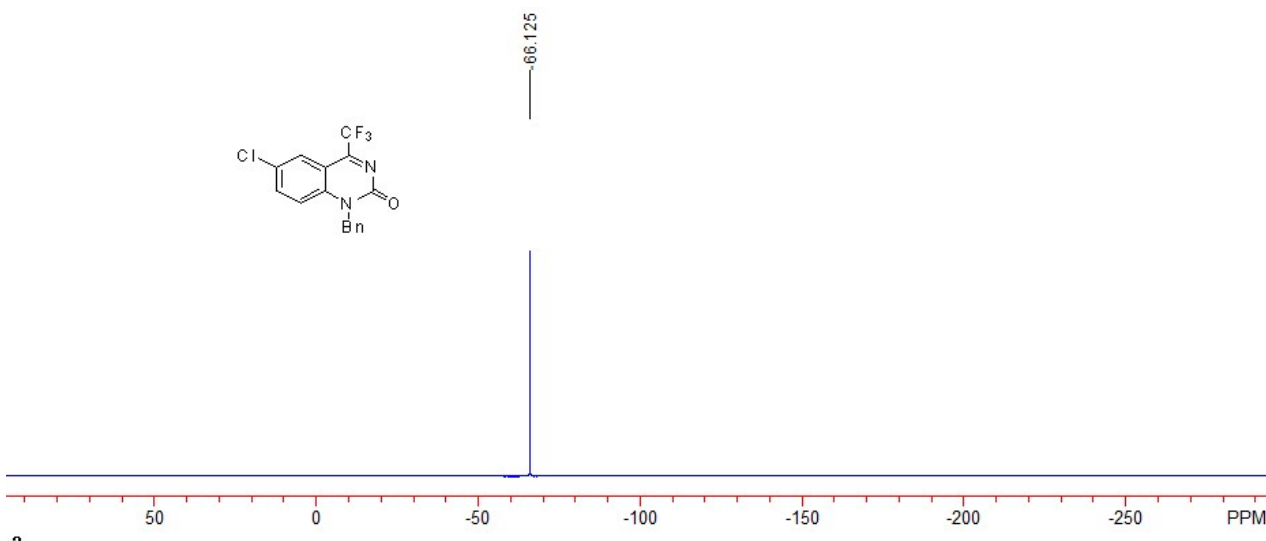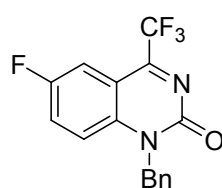

### 1-benzyl-6-fluoro-4-(trifluoromethyl)quinazolin-2(1H)-one (2f).

A yellow solid, 59% yield. M.p.: 142-144 °C. <sup>1</sup>H NMR (CDCl<sub>3</sub>, TMS, 400 MHz) δ 5.55 (s, 2H, CH<sub>2</sub>), 7.24-7.40 (m, 6H, ArH), 7.47-7.52 (m, 1H, ArH), 7.68-7.71 (m, 1H, ArH). <sup>13</sup>C NMR (CDCl<sub>3</sub>, TMS, 100 MHz) δ 48.39, 112.0 (dd, *J* = 3.1, 24.8 Hz), 112.4 (d, *J* = 8.6 Hz), 117.5 (d, *J* = 7.7 Hz), 119.5 (q, *J* = 278.0 Hz), 125.4 (d, *J* = 24.1 Hz), 126.7, 128.1, 129.1, 134.5, 141.2, 154.1, 157.5 (d, *J* = 246.3 Hz), 160.0 (dd, *J* = 3.1, 35.6 Hz). <sup>19</sup>F NMR (376 MHz, CDCl<sub>3</sub>, CFCl<sub>3</sub>) δ -66.39-(-66.40), -116.42-(-116.47). IR (CH<sub>2</sub>Cl<sub>2</sub>) ν 2954, 2923, 2853, 1682, 1566, 1445, 1238, 1203, 799, 728 cm<sup>-1</sup>.

MS (ESI)  $m/z$  (%): 323.1 (100)  $[M+H]^+$ ; HRMS (ESI) Calcd. For  $C_{16}H_{11}F_4N_2O^{+1}(M+H)^+$  requires 323.0802, Found: 323.0805.

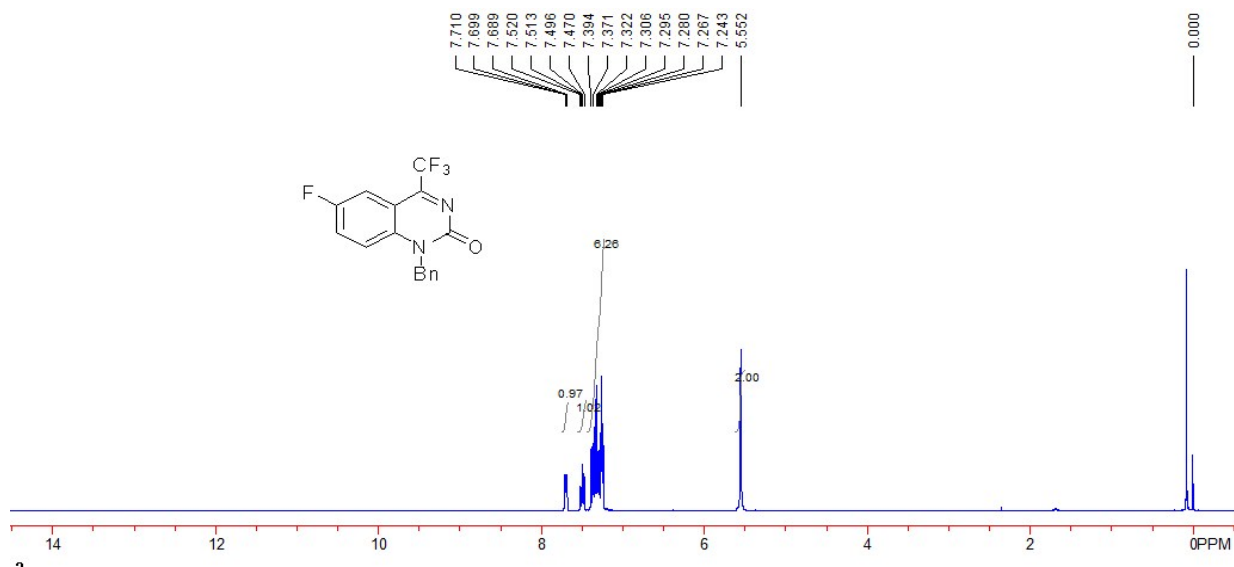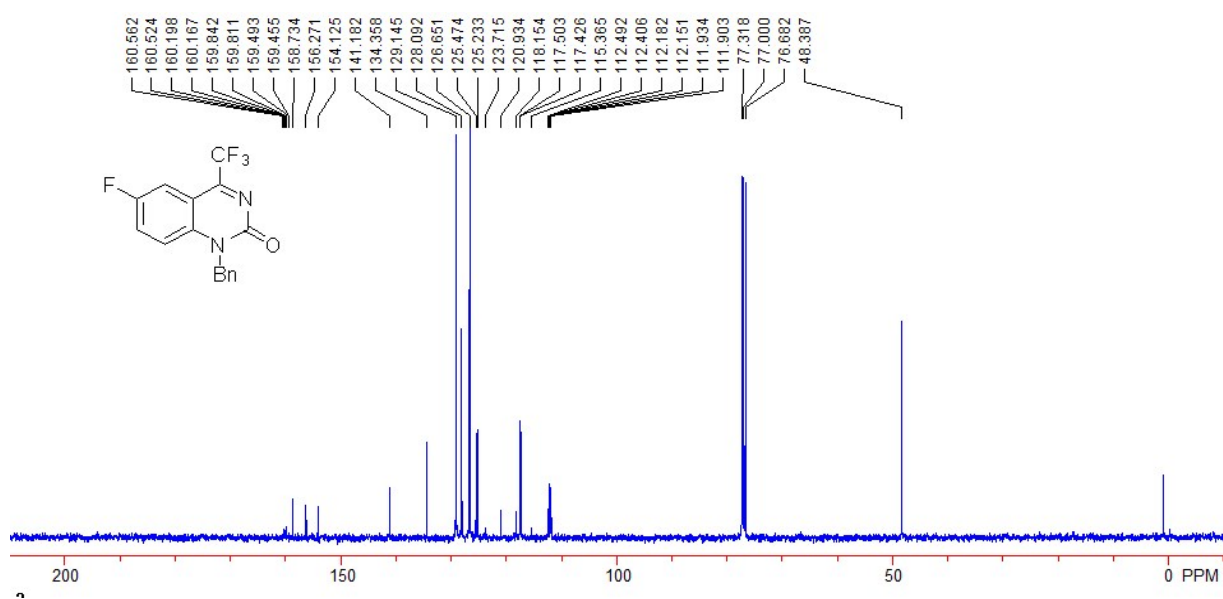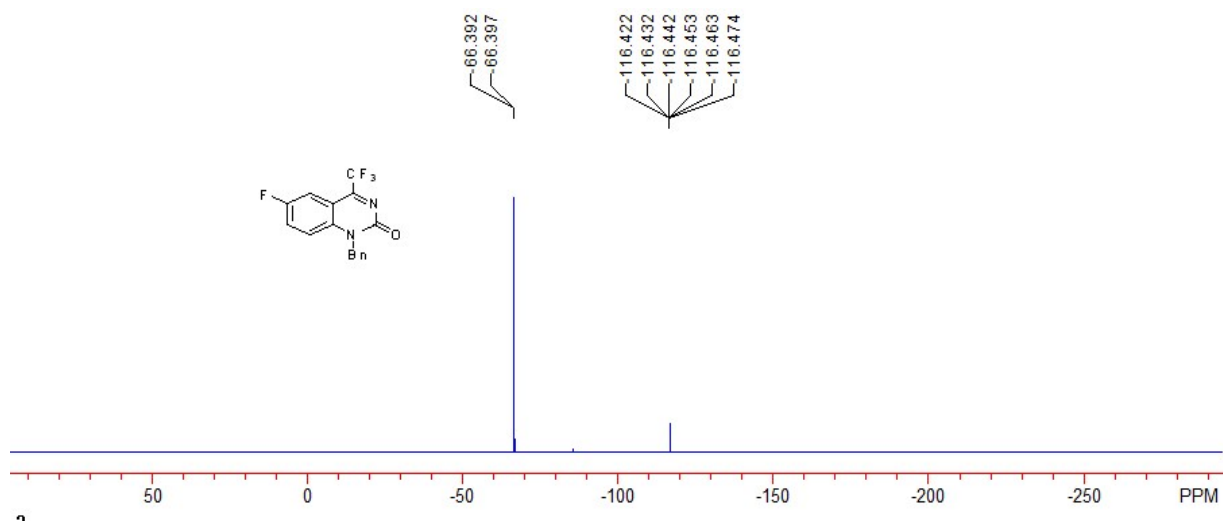

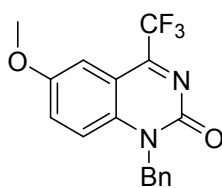

**1-benzyl-6-methoxy-4-(trifluoromethyl)quinazolin-2(1H)-one (2g).**

A green solid, 73% yield. M.p.: 161-163 °C.  $^1\text{H}$  NMR ( $\text{CDCl}_3$ , TMS, 400 MHz)  $\delta$  3.87 (s, 3H,  $\text{CH}_3$ ), 5.55 (s, 2H,  $\text{CH}_2$ ), 7.25-7.38 (m, 8H, ArH).  $^{13}\text{C}$  NMR ( $\text{CDCl}_3$ , TMS, 100 MHz)  $\delta$  48.15, 55.73, 107.0 (d,  $J = 3.0$  Hz), 112.7, 116.8, 119.8 (q,  $J = 278.1$  Hz), 126.7, 126.8, 127.9, 129.0, 134.8, 139.4, 154.3, 155.0, 159.6 (q,  $J = 35.0$  Hz).  $^{19}\text{F}$  NMR (376 MHz,  $\text{CDCl}_3$ ,  $\text{CFCl}_3$ )  $\delta$  -66.27. IR ( $\text{CH}_2\text{Cl}_2$ )  $\nu$  2956, 2923, 2852, 1456, 1400, 1259, 1088, 1017, 850, 798, 729  $\text{cm}^{-1}$ . MS (ESI)  $m/z$  (%): 335.1 (100)  $[\text{M}+\text{H}]^+$ ; HRMS (ESI) Calcd. For  $\text{C}_{17}\text{H}_{14}\text{F}_3\text{N}_2\text{O}_2$   $^+1(\text{M}+\text{H})^+$  requires 335.1002, Found: 335.1008.

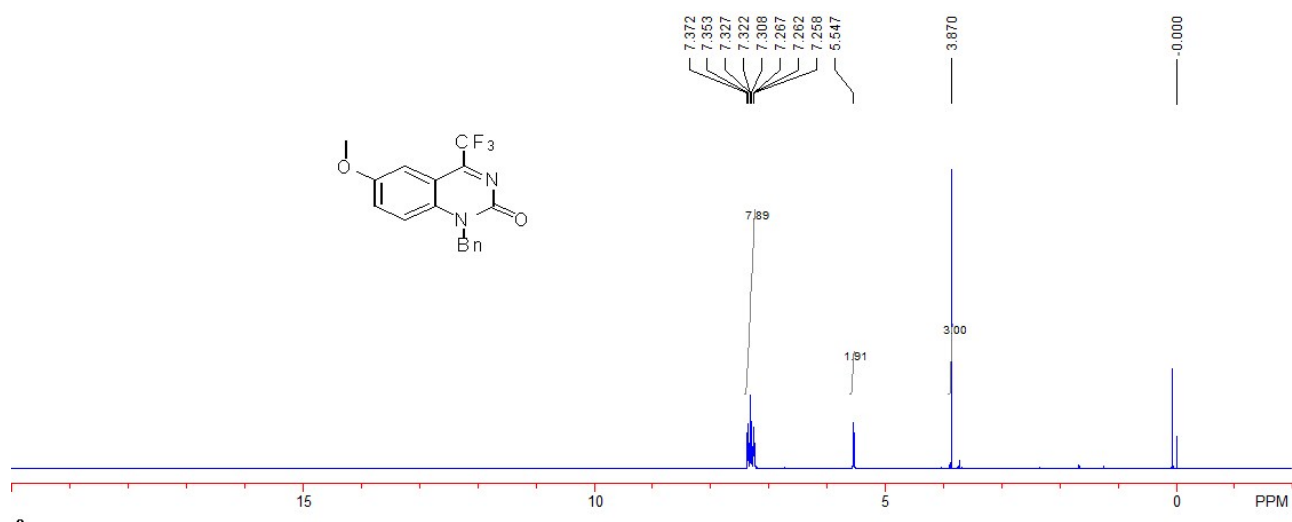

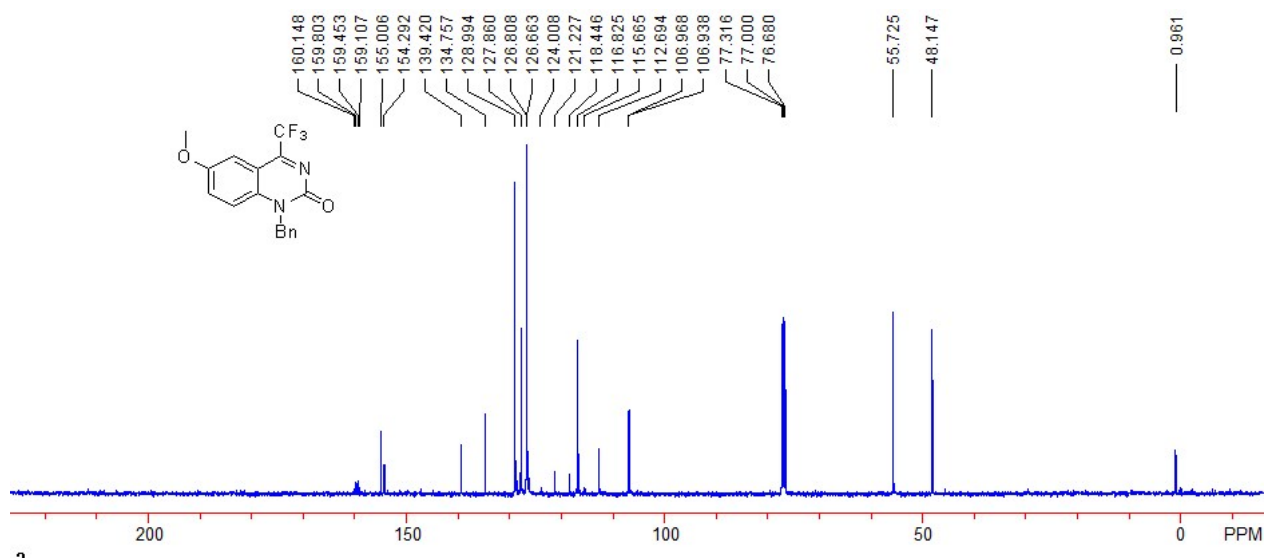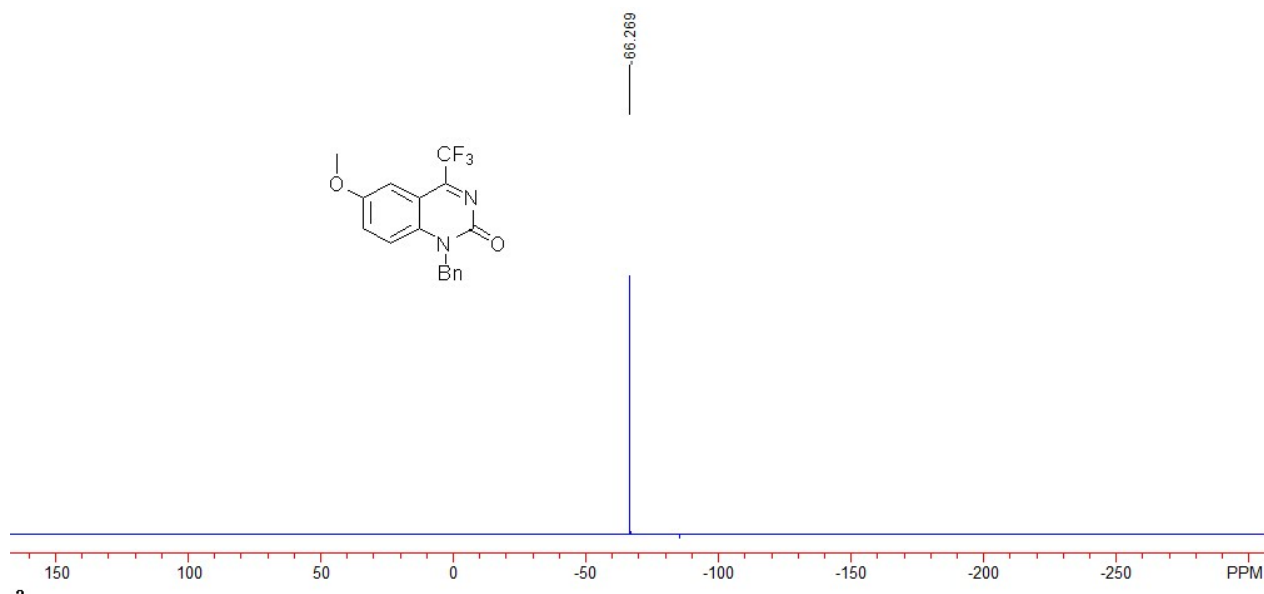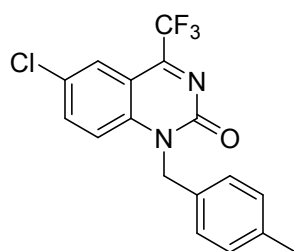

**6-chloro-1-(4-methylbenzyl)-4-(trifluoromethyl)quinazolin-2(1H)-one (2h).**

A yellow solid, 72% yield. M.p.: 158-160 °C.  $^1\text{H}$  NMR ( $\text{CDCl}_3$ , TMS, 400 MHz)  $\delta$  2.30 (s, 3H,  $\text{CH}_3$ ), 5.49 (s, 2H,  $\text{CH}_2$ ), 7.05-7.16 (m, 4H, ArH), 7.37(d,  $J = 9.6$  Hz, ArH), 7.67(dd,  $J = 2.0, 9.2$  Hz, ArH), 7.97 (s, 1H, ArH).  $^{13}\text{C}$  NMR ( $\text{CDCl}_3$ , TMS, 100 MHz)  $\delta$  21.0, 48.05, 112.7, 117.1, 119.5 (q,  $J = 278.6$  Hz), 125.9 (d,  $J = 3.8$  Hz), 126.7, 129.1, 129.7, 131.2, 136.8, 137.7, 153.9, 159.7 (q,  $J =$

34.9 Hz).  $^{19}\text{F}$  NMR (376 MHz,  $\text{CDCl}_3$ ,  $\text{CFCl}_3$ )  $\delta$  -66.09 (d,  $J=1.5$  Hz). IR ( $\text{CH}_2\text{Cl}_2$ )  $\nu$  3214, 3078, 2921, 1697, 1668, 1622, 1556, 1223, 1200, 973, 822  $\text{cm}^{-1}$ . MS (ESI)  $m/z$  (%): 353.1 (100)  $[\text{M}+\text{H}]^+$ ; HRMS (ESI) Calcd. For  $\text{C}_{17}\text{H}_{13}\text{ClF}_3\text{N}_2\text{O}^+ (\text{M}+\text{H})^+$  requires 353.0663, Found: 353.0662.

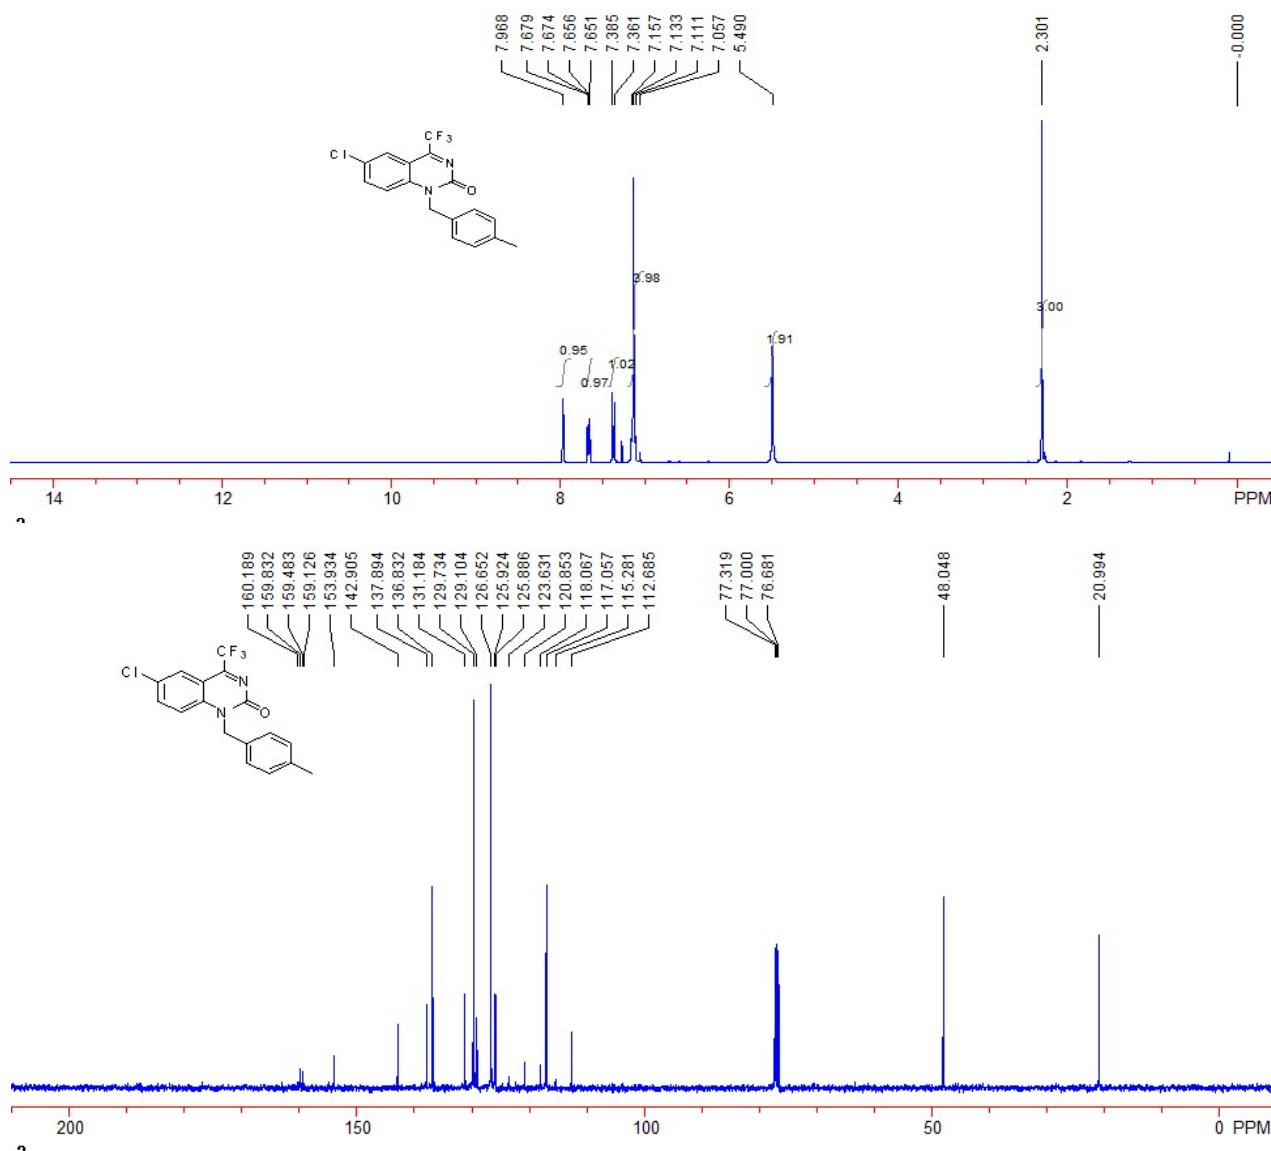

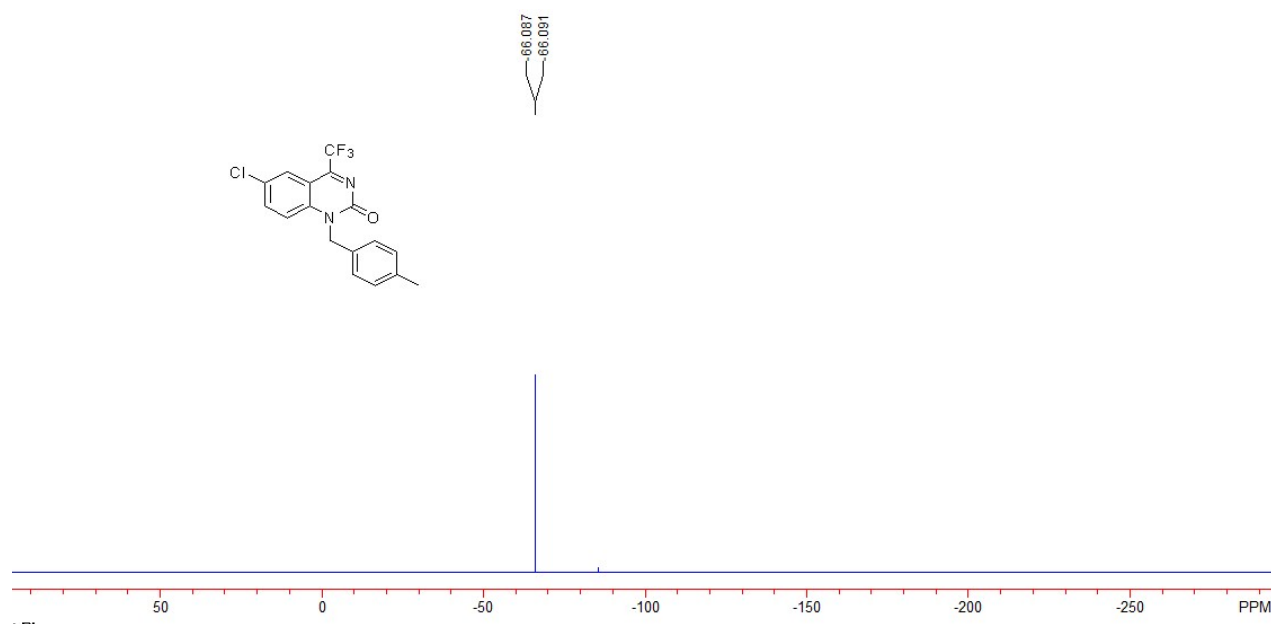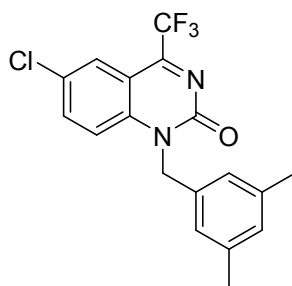

**6-chloro-1-(3,5-dimethylbenzyl)-4-(trifluoromethyl)quinazolin-2(1H)-one (2i).**

A yellow solid, 76% yield. M.p.: 153-155 °C.  $^1\text{H}$  NMR ( $\text{CDCl}_3$ , TMS, 400 MHz)  $\delta$  2.26 (s, 6H,  $\text{CH}_3$ ), 5.45 (s, 2H,  $\text{CH}_2$ ), 6.84 (s, 1H, ArH), 6.91 (s, 1H, ArH), 7.35(d,  $J = 9.2$  Hz, ArH), 7.67(dd,  $J = 2.0, 9.2$  Hz, ArH), 7.97-7.99 (m, 1H, ArH).  $^{13}\text{C}$  NMR ( $\text{CDCl}_3$ , TMS, 100 MHz)  $\delta$  21.2, 48.34, 112.7, 117.1, 119.5 (q,  $J = 277.8$  Hz), 124.3, 125.9 (d,  $J = 3.0$  Hz), 129.1, 129.8, 134.2, 136.9, 138.8, 143.0, 154.0, 159.7 (q,  $J = 35.0$  Hz).  $^{19}\text{F}$  NMR (376 MHz,  $\text{CDCl}_3$ ,  $\text{CFCl}_3$ )  $\delta$  -66.08 (d,  $J = 1.9$  Hz). IR ( $\text{CH}_2\text{Cl}_2$ )  $\nu$  2970, 1680, 1622, 1556, 1449, 1222, 1200, 1142, 976, 816  $\text{cm}^{-1}$ . MS (ESI)  $m/z$  (%): 367.1 (100)  $[\text{M}+\text{H}]^+$ ; HRMS (ESI) Calcd. For  $\text{C}_{18}\text{H}_{15}\text{F}_3\text{N}_2\text{O}^+ (\text{M}+\text{H})^+$  requires 367.0820, Found: 367.0822.

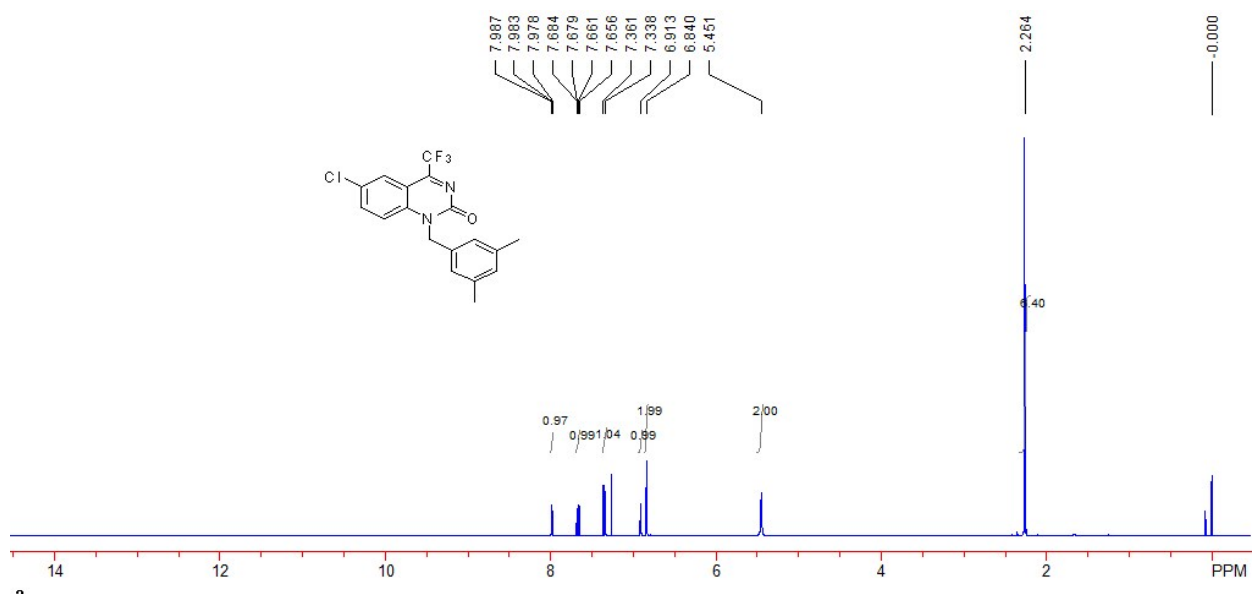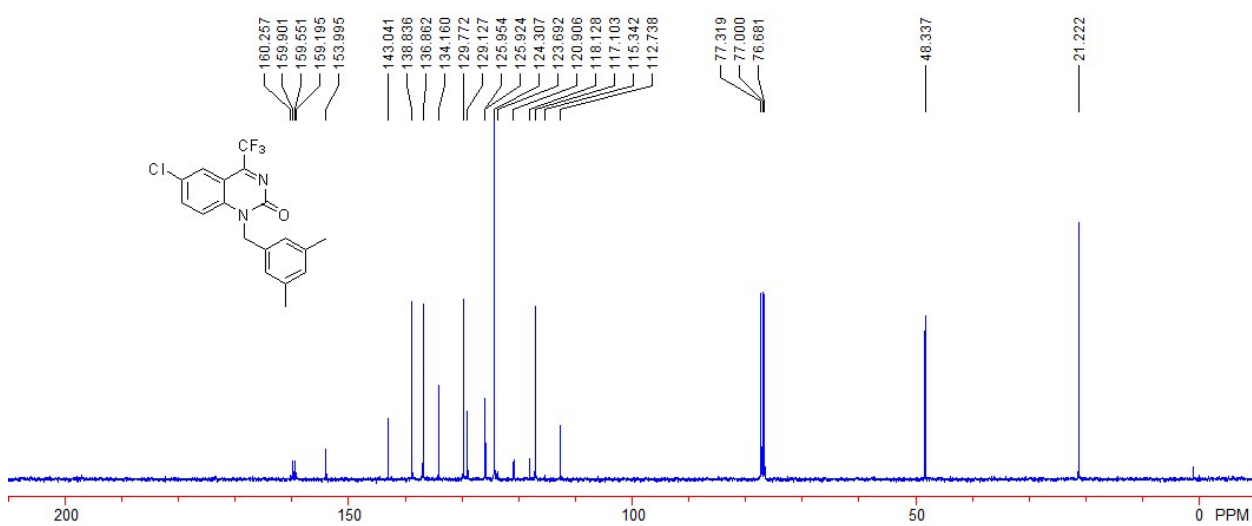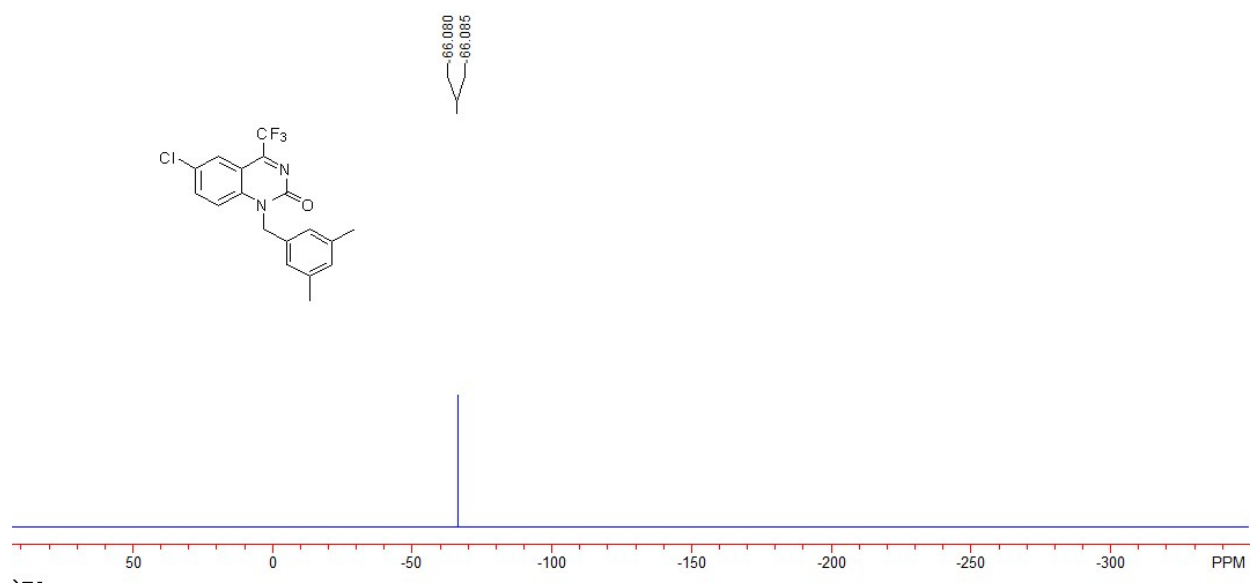

## General Procedure for Hex-3-yn-2-one **1a** to Cyclic Trifluoromethyl Ketimines **2** and Spectroscopic Data of the Products

*General procedure:* The 4Å MS was added to a Schlenk tube and heated under vacuum to remove ambient moisture and water, then filled with argon. After the Schlenk tube was returned to room temperature, cyclic trifluoromethyl ketimines **2** (0.2 mmol) and P(4-FC<sub>6</sub>H<sub>4</sub>)<sub>3</sub> (13 mg, 0.04 mmol) was added. Under argon atmosphere, to a solution of cyclic trifluoromethyl ketimines **2** (0.2 mmol) and P(4-FC<sub>6</sub>H<sub>4</sub>)<sub>3</sub> (13 mg, 0.04 mmol) in toluene (1.0 mL) was added the hex-3-yn-2-one **1a** (0.8 mmol) at room temperature. Then the resulting mixture was heated to 65 °C and continued stirring at 65 °C until the reaction completed (monitoring by TLC). Then the solvent was removed under reduced pressure and the residue was directly subjected to a flash column chromatography on silica gel to afford the desired products **3a-3i**. Trace impurity was contained, which has been described in detail in Page S47.

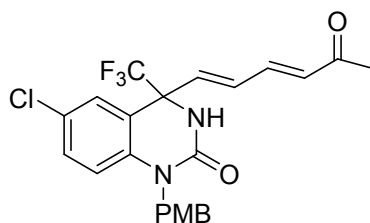

### 6-chloro-1-(4-methoxybenzyl)-4-((1E,3E)-5-oxohexa-1,3-dien-1-yl)-4-(trifluoromethyl)-3,4-dihydroquinazolin-2(1H)-one (**3a**).

A white solid, 92% yield (85 mg). M.p.: 243-245 °C. <sup>1</sup>H NMR (d<sub>6</sub>-DMSO, TMS, 400 MHz) δ 2.28 (s, 3H, CH<sub>3</sub>), 3.72 (s, 3H, CH<sub>3</sub>), 4.98 (d, *J* = 16.4 Hz, 1H, CH<sub>2</sub>), 5.19 (d, *J* = 16.4 Hz, 1H, CH<sub>2</sub>), 6.31 (d, *J* = 16.0 Hz, 1H, =CH), 6.82 (dd, *J* = 10.4, 15.2 Hz, 1H, =CH), 6.90 (d, *J* = 8.8 Hz, 2H, ArH), 6.97 (d, *J* = 9.2 Hz, 1H, ArH), 7.07 (d, *J* = 15.2 Hz, 1H, =CH), 7.18 (d, *J* = 8.8 Hz, 2H, ArH), 7.37-7.47 (m, 3H, =CH, ArH), 7.45 (s, 1H, NH). <sup>13</sup>C NMR (CDCl<sub>3</sub>, TMS, 75 MHz) δ 27.6, 45.5, 55.2, 62.5 (q, *J* = 28.9 Hz), 114.3, 116.3, 118.9, 124.6 (q, *J* = 286.2 Hz), 127.6, 127.7, 127.8, 127.9, 128.4, 128.5, 128.7, 130.4, 133.3, 133.8, 135.1, 136.2, 140.1, 158.9, 198.0. <sup>19</sup>F NMR (376 MHz, CDCl<sub>3</sub>, CFCl<sub>3</sub>) δ -80.10. IR (CH<sub>2</sub>Cl<sub>2</sub>) ν 3214, 2960, 2925, 1682, 1601, 1513, 1502, 1428, 1393, 1250, 1175, 1066, 1045, 808 cm<sup>-1</sup>. MS (ESI) *m/z* (%): 487.0 (100) [M+Na]<sup>+</sup>; HRMS (ESI) Calcd. For C<sub>23</sub>H<sub>21</sub>F<sub>3</sub>N<sub>2</sub>ClO<sub>3</sub><sup>+</sup>(M+H)<sup>+</sup> requires 465.1187, Found: 465.1180.

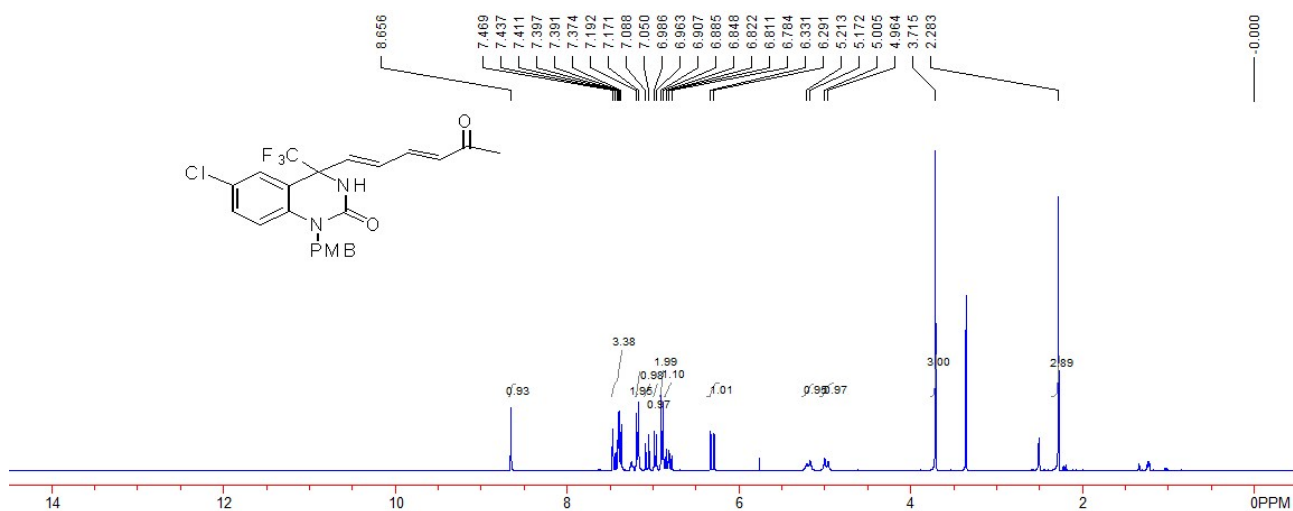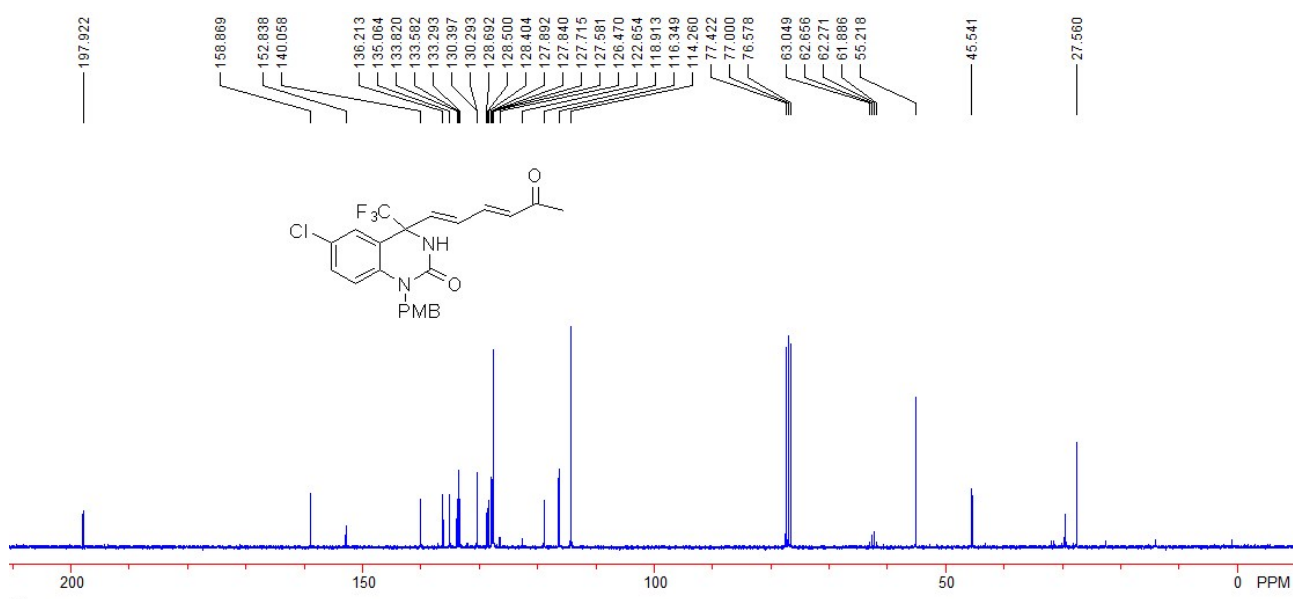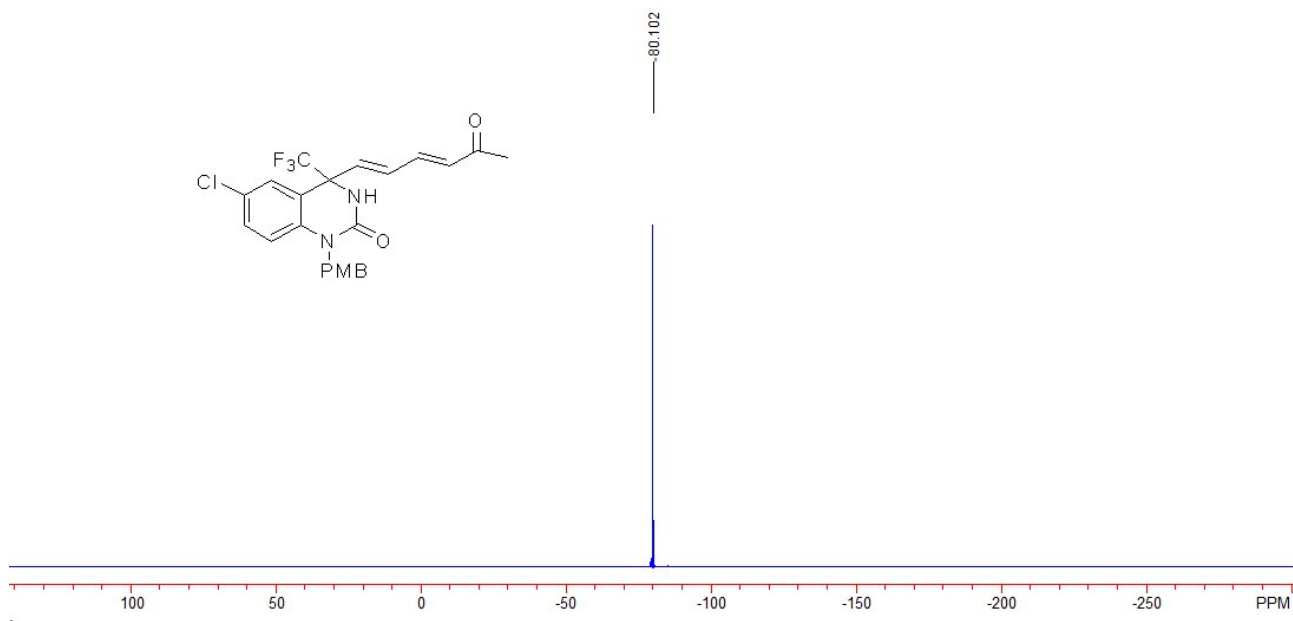

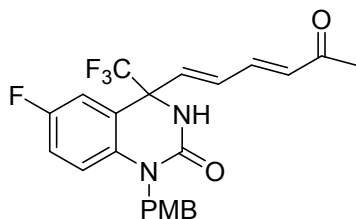

**6-fluoro-1-(4-methoxybenzyl)-4-((1E,3E)-5-oxohexa-1,3-dien-1-yl)-4-(trifluoromethyl)-3,4-dihydroquinazolin-2(1H)-one (3b).**

A white solid, 83% yield (74 mg). M.p.: 231-233 °C.  $^1\text{H}$  NMR ( $\text{CDCl}_3$ , TMS, 400 MHz)  $\delta$  2.31 (s, 3H,  $\text{CH}_3$ ), 3.78 (s, 3H,  $\text{CH}_3$ ), 5.03 (d,  $J = 16.4$  Hz, 1H,  $\text{CH}_2$ ), 5.18 (d,  $J = 16.4$  Hz, 1H,  $\text{CH}_2$ ), 5.73 (s, 1H, NH), 6.27 (d,  $J = 15.6$  Hz, 1H,  $=\text{CH}$ ), 6.54 (d,  $J = 15.6$  Hz, 1H,  $=\text{CH}$ ), 6.73 (dd,  $J = 10.8, 15.6$  Hz, 1H,  $=\text{CH}$ ), 6.81-6.87 (m, 3H, ArH,  $=\text{CH}$ ), 6.94-6.97 (m, 2H, ArH), 7.14-7.22 (m, 3H, ArH).  $^{13}\text{C}$  NMR ( $\text{CDCl}_3$ , TMS, 100 MHz)  $\delta$  27.7, 45.8, 55.3, 62.6 (q,  $J = 29.6$  Hz), 114.3, 114.9 (d,  $J = 24.3$  Hz), 116.5 (d,  $J = 8.4$  Hz), 117.4 (d,  $J = 22.0$  Hz), 118.6 (d,  $J = 6.9$  Hz), 124.6 (q,  $J = 287.7$  Hz), 127.6, 128.0, 133.2, 133.7, 133.9 (d,  $J = 2.3$  Hz), 135.4, 139.8, 152.4, 157.9 (d,  $J = 242.1$  Hz), 158.9, 197.8.  $^{19}\text{F}$  NMR (376 MHz,  $\text{CDCl}_3$ ,  $\text{CFCl}_3$ )  $\delta$  -80.03, -119.89-(-119.95) (m). IR ( $\text{CH}_2\text{Cl}_2$ )  $\nu$  3366, 2955, 2923, 2853, 1678, 1513, 1457, 1377, 1259, 1089, 1017, 800  $\text{cm}^{-1}$ . MS (ESI)  $m/z$  (%): 449.1 (100)  $[\text{M}+\text{H}]^+$ ; HRMS (ESI) Calcd. For  $\text{C}_{23}\text{H}_{21}\text{F}_4\text{N}_2\text{O}_3$   $^+1(\text{M}+\text{H})^+$  requires 449.1483, Found: 449.1487.

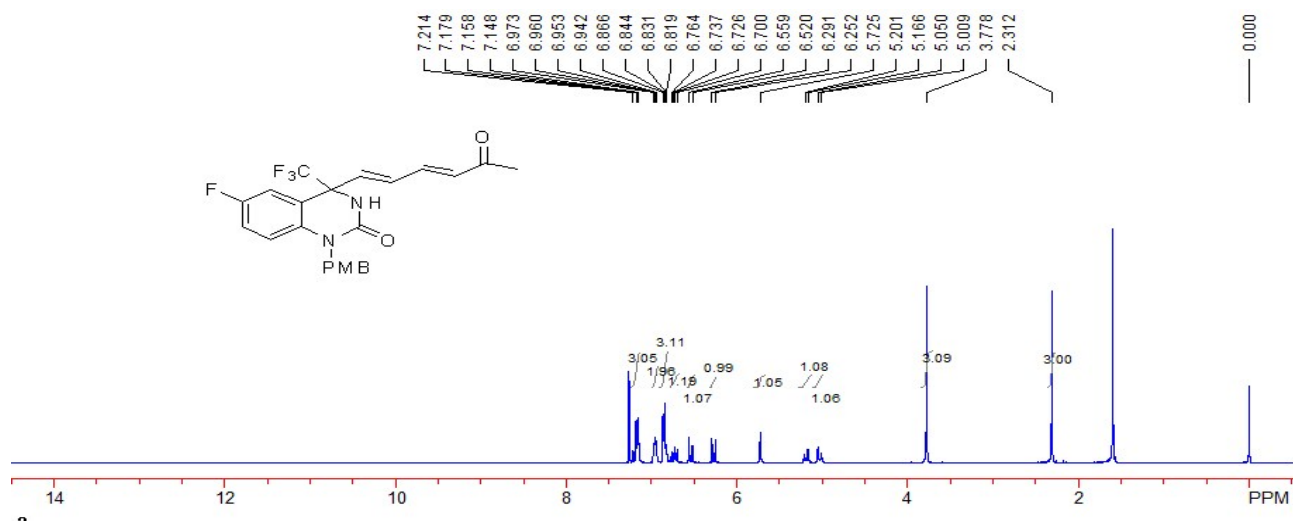

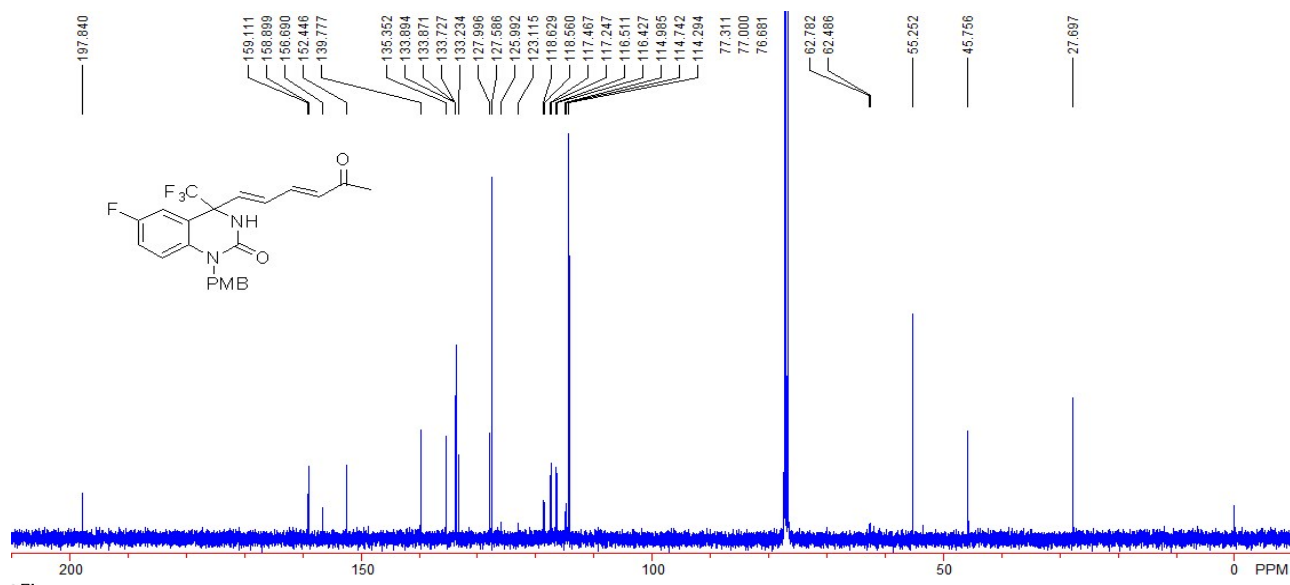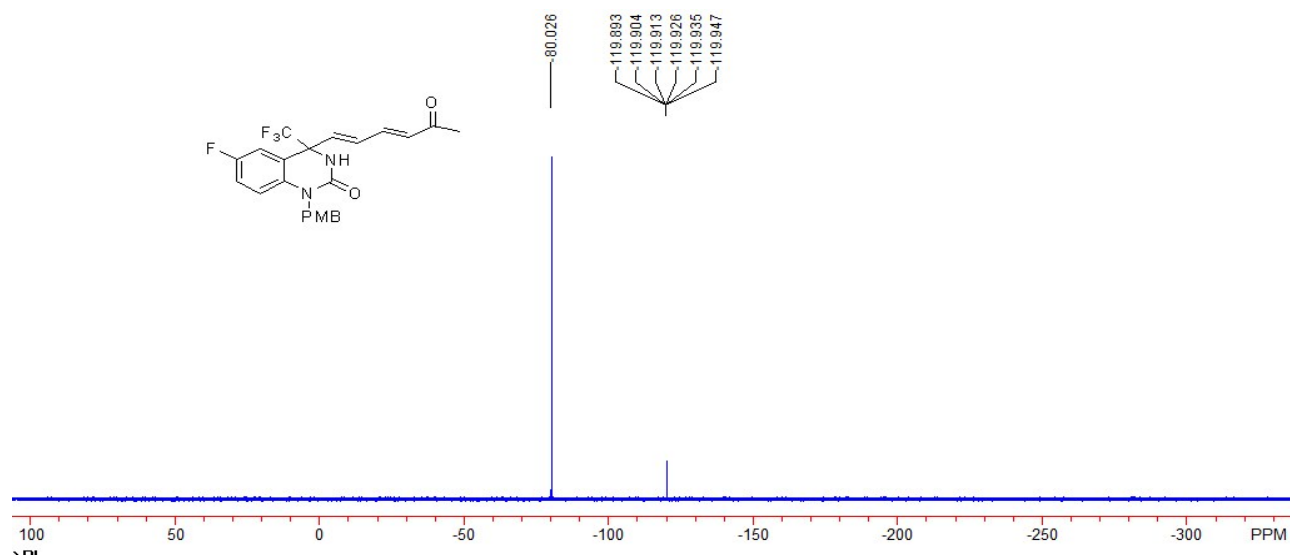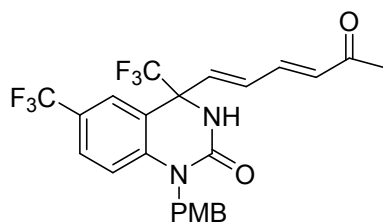

**1-(4-methoxybenzyl)-4-((1E,3E)-5-oxohexa-1,3-dien-1-yl)-4,6-bis(trifluoromethyl)-3,4-dihydroquinazolin-2(1H)-one (3c).**

A white solid, 73% yield (72 mg). M.p.: 165-167 °C. <sup>1</sup>H NMR (CDCl<sub>3</sub>, TMS, 400 MHz) δ 2.28 (s, 3H, CH<sub>3</sub>), 3.78 (s, 3H, CH<sub>3</sub>), 5.07 (d, *J* = 16.4 Hz, 1H, CH<sub>2</sub>), 5.23 (d, *J* = 16.4 Hz, 1H, CH<sub>2</sub>), 6.22 (d, *J* = 15.6 Hz, 1H, =CH), 6.61 (d, *J* = 15.2 Hz, 1H, =CH), 6.77-6.88 (m, 3H, ArH, =CH), 6.99 (d, *J* = 8.8 Hz, 1H, ArH), 7.16-7.23 (m, 3H, ArH, =CH), 7.40 (br, 1H, NH) 7.46-7.51 (m, 2H, ArH).

$^{13}\text{C}$  NMR ( $\text{CDCl}_3$ , TMS, 100 MHz)  $\delta$  27.4, 45.6, 55.2, 62.5 (q,  $J = 29.5$  Hz), 114.3, 115.2, 117.9, 123.5 (q,  $J = 269.9$  Hz), 124.5 (q,  $J = 287.7$  Hz), 127.59, 127.62, 133.6, 134.6, 140.1, 140.4, 153.1, 158.9, 198.0.  $^{19}\text{F}$  NMR (376 MHz,  $\text{CDCl}_3$ ,  $\text{CFCl}_3$ )  $\delta$  -62.07, -80.34. IR ( $\text{CH}_2\text{Cl}_2$ )  $\nu$  3219, 3091, 2955, 2915, 2853, 1685, 1624, 1598, 1513, 1394, 1370, 1329, 1290, 1249, 1171, 1121, 1090, 998, 821, 738  $\text{cm}^{-1}$ . MS (ESI)  $m/z$  (%): 516.2 (100)  $[\text{M}+\text{NH}_4]^+$ ; HRMS (ESI) Calcd. For  $\text{C}_{24}\text{H}_{24}\text{F}_6\text{N}_3\text{O}_3$   $^+1(\text{M}+\text{NH}_4)^+$  requires 516.1716, Found: 516.1713.

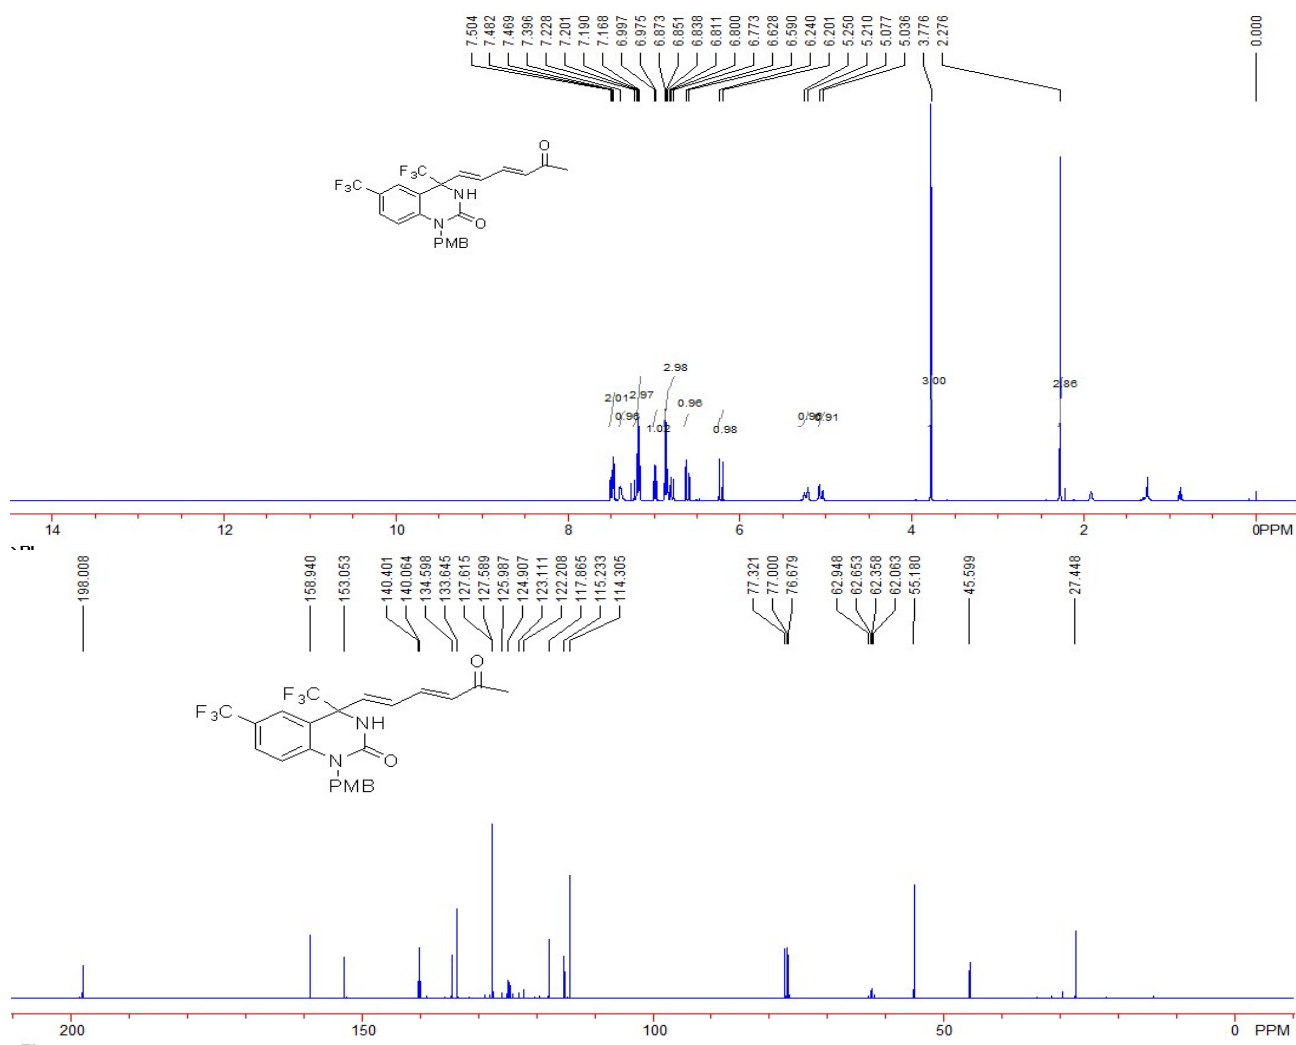

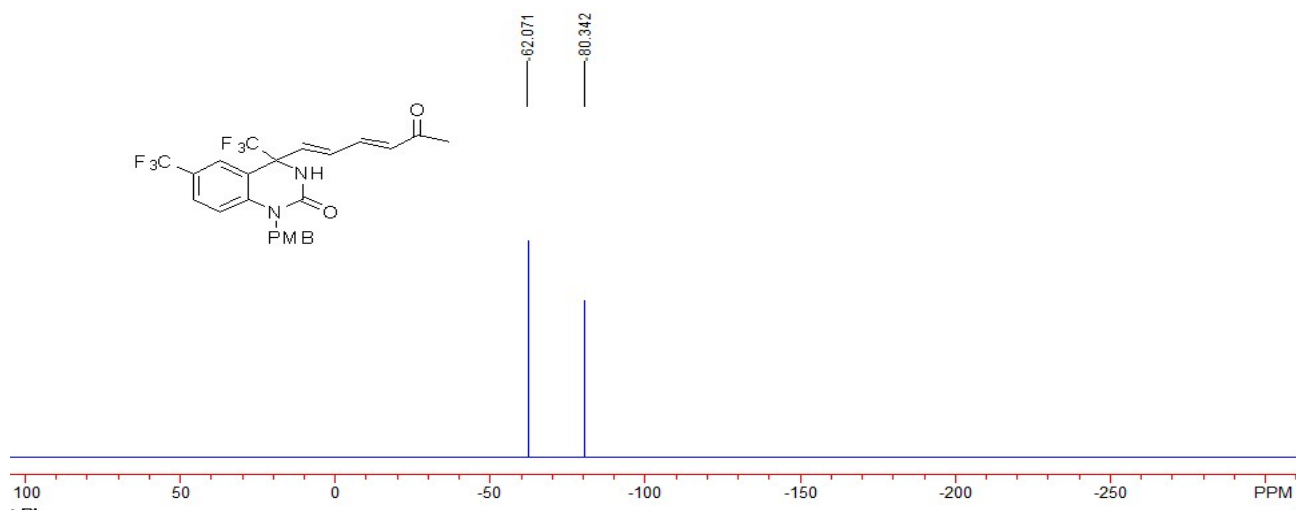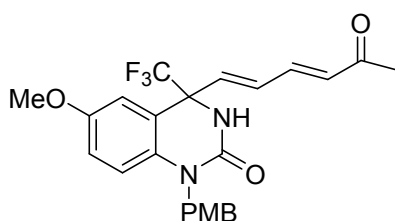

**6-methoxy-1-(4-methoxybenzyl)-4-((1E,3E)-5-oxohexa-1,3-dien-1-yl)-4-(trifluoromethyl)-3,4-dihydroquinazolin-2(1H)-one (3d).**

A white solid, 76% yield (70 mg). M.p.: 215-217 °C. <sup>1</sup>H NMR (CDCl<sub>3</sub>, TMS, 400 MHz) δ 2.31 (s, 3H, CH<sub>3</sub>), 3.74 (s, 3H, CH<sub>3</sub>), 3.77 (s, 3H, CH<sub>3</sub>), 5.02 (d, *J* = 16.0 Hz, 1H, CH<sub>2</sub>), 5.18 (d, *J* = 16.0 Hz, 1H, CH<sub>2</sub>), 5.61 (s, 1H, NH), 6.27 (d, *J* = 15.6 Hz, 1H, =CH), 6.57 (d, *J* = 15.2 Hz, 1H, =CH), 6.73 (dd, *J* = 10.4, 15.2 Hz, 1H, =CH), 6.77-6.81 (m, 3H, ArH, =CH), 6.84 (d, *J* = 8.4 Hz, 2H, ArH), 7.14-7.22 (m, 3H, ArH). <sup>13</sup>C NMR (CDCl<sub>3</sub>, TMS, 100 MHz) δ 27.7, 45.6, 55.2, 55.6, 62.8 (q, *J* = 28.9 Hz), 114.1, 114.2, 115.0, 116.1, 118.4, 124.7 (q, *J* = 287.7 Hz), 127.6, 128.5, 131.0, 132.7, 133.4, 136.1, 140.0, 152.7, 154.9, 158.8, 197.9. <sup>19</sup>F NMR (376 MHz, CDCl<sub>3</sub>, CFC<sub>3</sub>) δ -79.79. IR (CH<sub>2</sub>Cl<sub>2</sub>) ν 3344, 2954, 2922, 2852, 1673, 1596, 1513, 1455, 1401, 1377, 1259, 1175, 1089, 1018, 800, 762 cm<sup>-1</sup>. MS (ESI) *m/z* (%): 461.2 (100) [M+H]<sup>+</sup>; HRMS (ESI) Calcd. For C<sub>24</sub>H<sub>24</sub>F<sub>3</sub>N<sub>2</sub>O<sub>4</sub><sup>+</sup>(M+H)<sup>+</sup> requires 461.1683, Found: 461.1689.

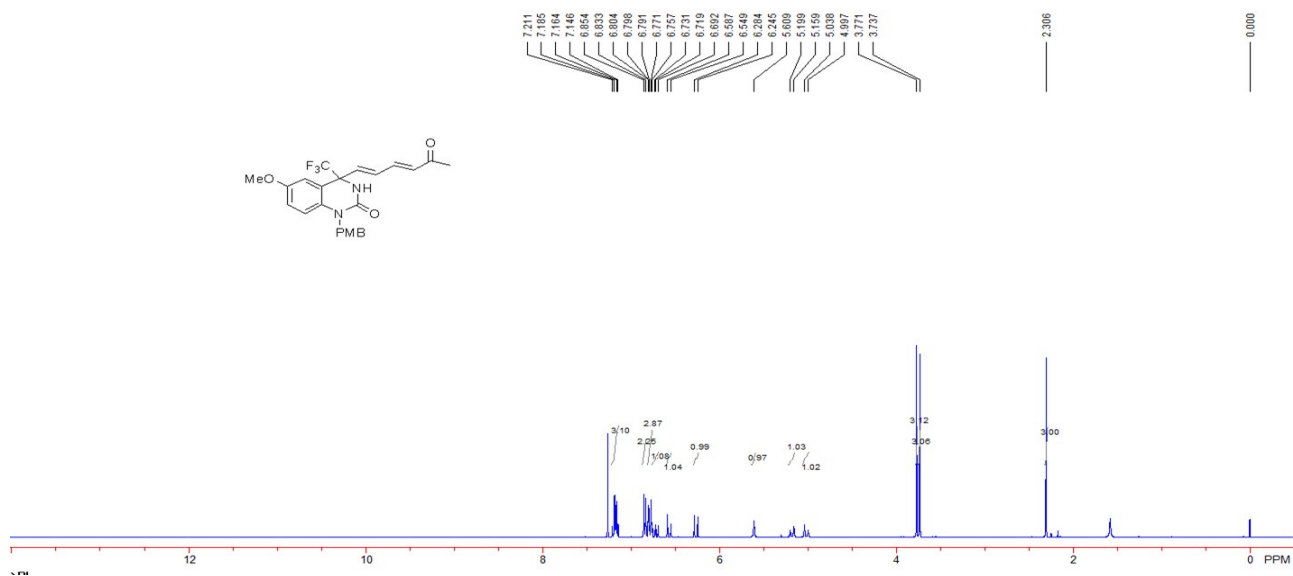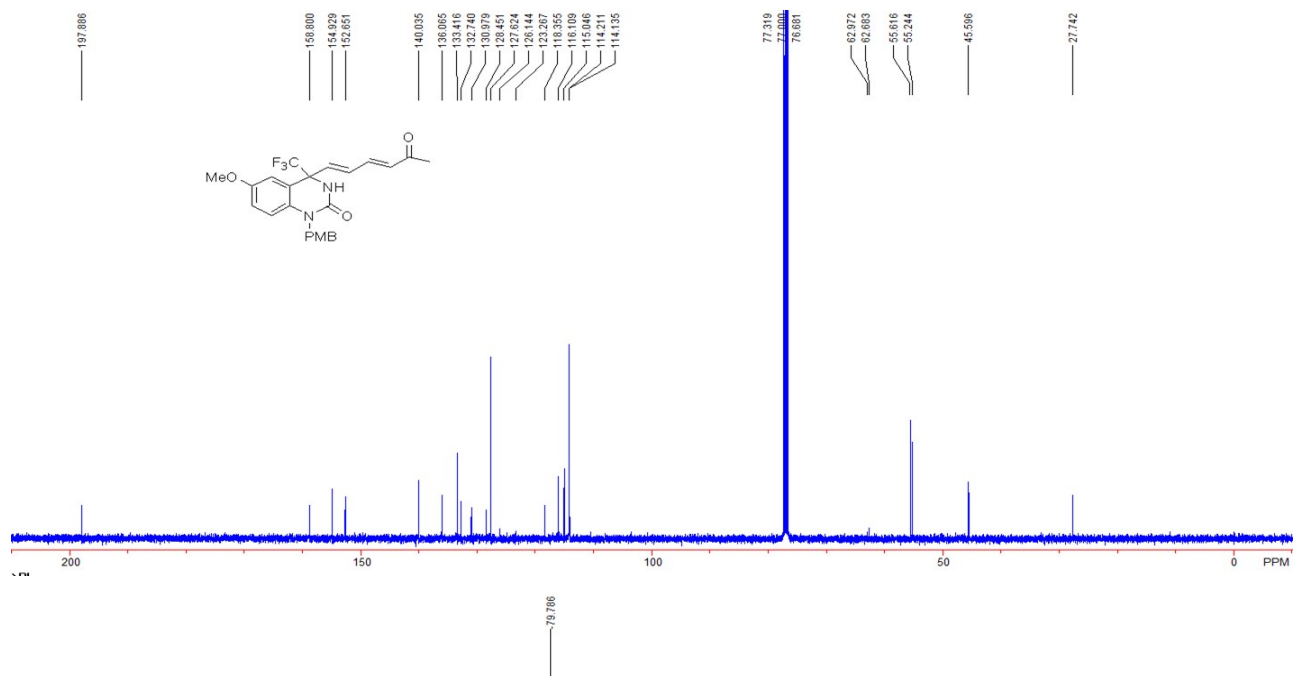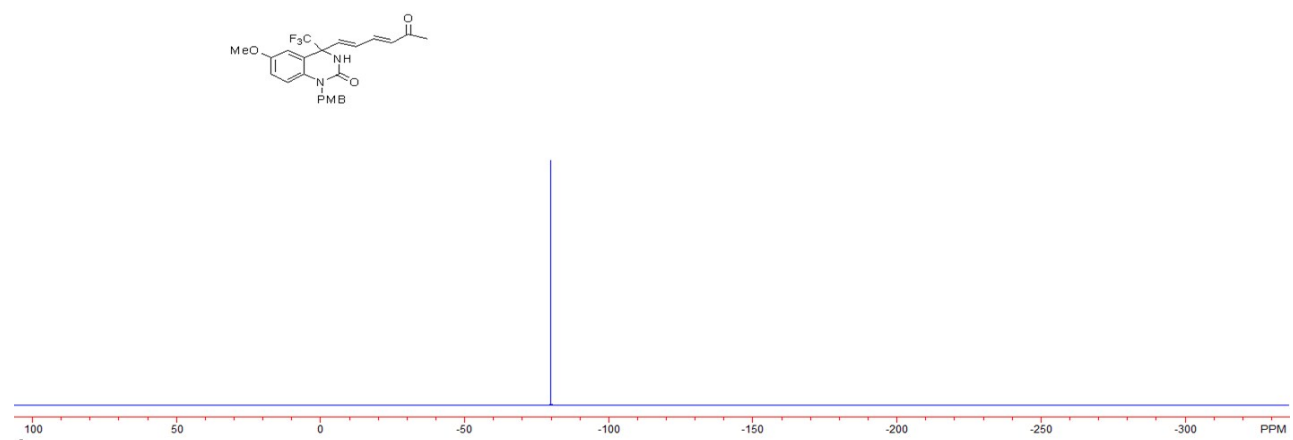

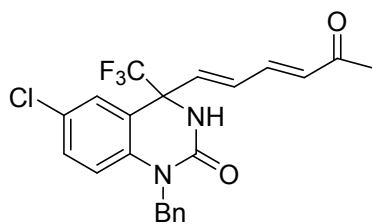

**1-benzyl-6-chloro-4-((1E,3E)-5-oxohexa-1,3-dien-1-yl)-4-(trifluoromethyl)-3,4-dihydroquinazolin-2(1H)-one (3e).**

A white solid, 82% yield (71 mg). M.p.: 213-215 °C.  $^1\text{H}$  NMR ( $\text{CDCl}_3$ , TMS, 400 MHz)  $\delta$  2.29 (s, 3H,  $\text{CH}_3$ ), 5.08 (d,  $J = 16.8$  Hz, 1H,  $\text{CH}_2$ ), 5.24 (d,  $J = 16.8$  Hz, 1H,  $\text{CH}_2$ ), 6.23 (d,  $J = 15.6$  Hz, 1H,  $=\text{CH}$ ), 6.55 (d,  $J = 15.2$  Hz, 1H,  $=\text{CH}$ ), 6.66 (s, 1H, NH), 6.73-6.80 (m, 2H,  $=\text{CH}$ ), 7.17-7.26 (m, 6H, ArH), 7.30-7.34 (m, 2H, ArH).  $^{13}\text{C}$  NMR ( $\text{CDCl}_3$ , TMS, 100 MHz)  $\delta$  27.6, 46.1, 62.5 (d,  $J = 29.7$  Hz), 116.3, 118.9, 124.6 (q,  $J = 287.1$  Hz), 126.2, 127.4, 127.8, 127.9, 128.9, 130.4, 133.3, 133.6, 135.0, 136.0, 136.2, 140.1, 152.8, 198.0.  $^{19}\text{F}$  NMR (376 MHz,  $\text{CDCl}_3$ ,  $\text{CFCl}_3$ )  $\delta$  -80.08. IR ( $\text{CH}_2\text{Cl}_2$ )  $\nu$  3216, 3084, 2954, 2923, 2851, 1682, 1599, 1501, 1425, 1175  $\text{cm}^{-1}$ . MS (ESI)  $m/z$  (%): 435.1 (100)  $[\text{M}+\text{H}]^+$ ; HRMS (ESI) Calcd. For  $\text{C}_{22}\text{H}_{19}\text{F}_3\text{N}_2\text{O}_3^+ (\text{M}+\text{H})^+$  requires 435.1082, Found: 435.1080.

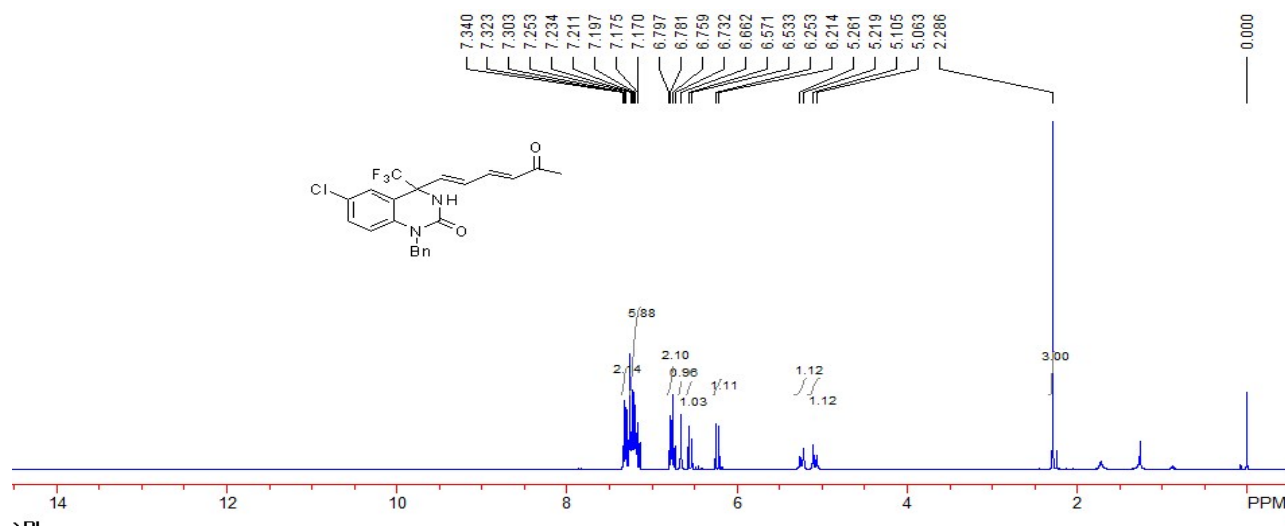

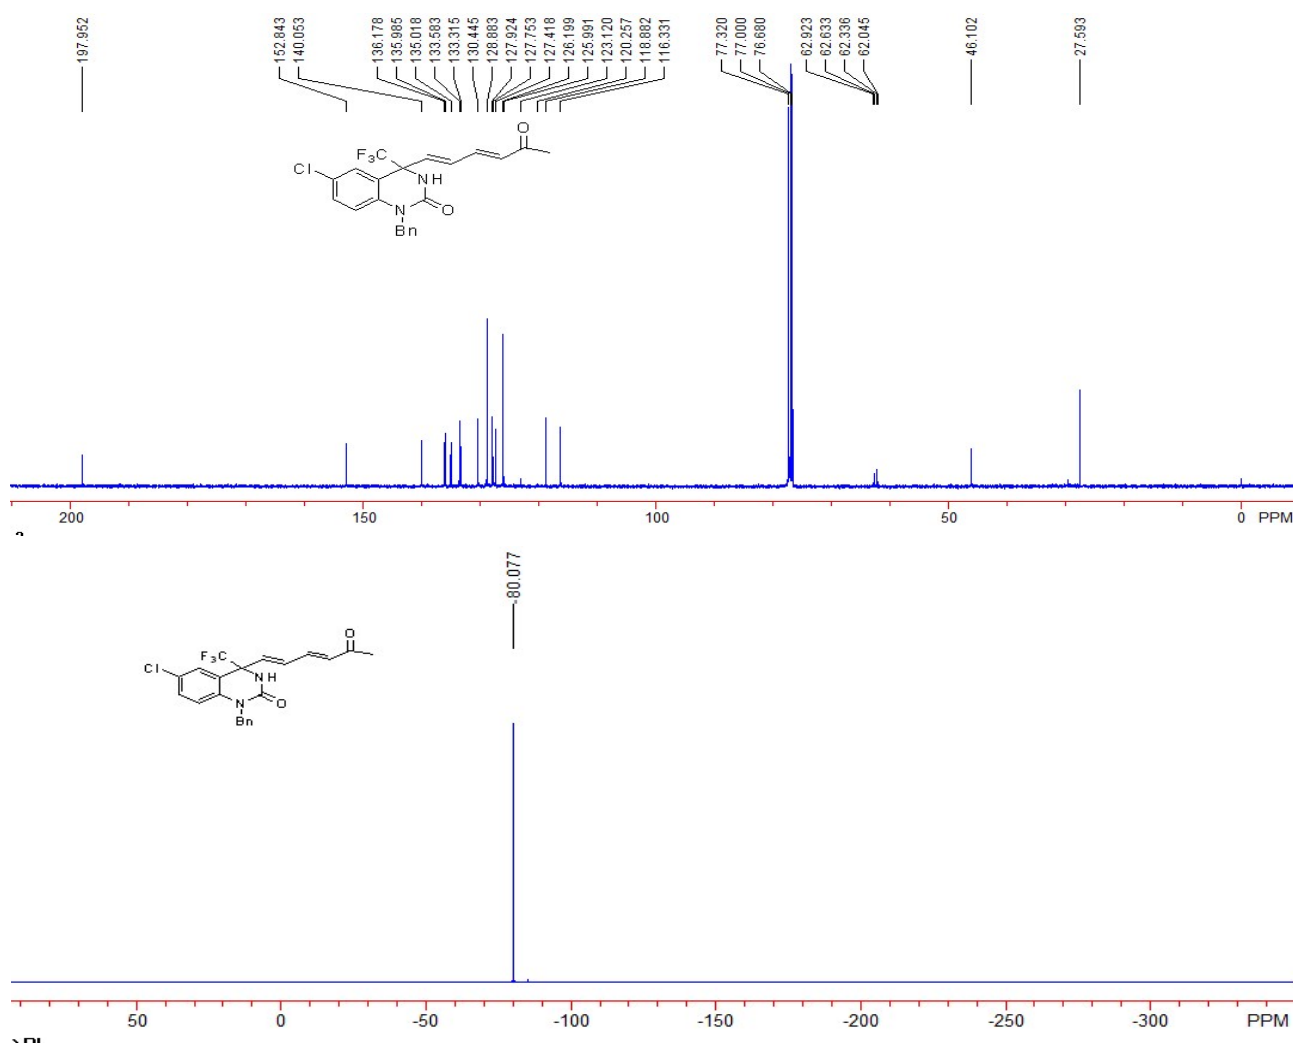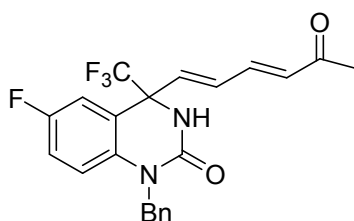

**1-benzyl-6-fluoro-4-((1E,3E)-5-oxohexa-1,3-dien-1-yl)-4-(trifluoromethyl)-3,4-dihydroquinazolin-2(1H)-one (3f).**

A white solid, 90% yield (75 mg). M.p.: 226-228 °C. <sup>1</sup>H NMR (CDCl<sub>3</sub>, TMS, 400 MHz) δ 2.30 (s, 3H, CH<sub>3</sub>), 5.11 (d, *J* = 16.8 Hz, 1H, CH<sub>2</sub>), 5.24 (d, *J* = 16.8 Hz, 1H, CH<sub>2</sub>), 6.12 (s, 1H, NH), 6.26 (d, *J* = 15.6 Hz, 1H, =CH), 6.55 (d, *J* = 15.2 Hz, 1H, =CH), 6.72-6.82 (m, 2H, ArH, =CH), 6.92-6.99 (m, 2H, ArH), 7.18 (dd, *J* = 10.8, 15.6 Hz, 1H, =CH), 7.22-7.27 (m, 3H, ArH), 7.30-7.35 (m, 2H, ArH). <sup>13</sup>C NMR (CDCl<sub>3</sub>, TMS, 100 MHz) δ 27.7, 46.3, 62.6 (q, *J* = 30.5 Hz), 114.9 (d, *J* = 25.3 Hz), 116.4 (d, *J* = 3.9 Hz), 117.4 (d, *J* = 22.0 Hz), 118.6 (d, *J* = 7.1 Hz), 124.6 (q, *J* = 287.1 Hz), 126.2,

127.4, 128.9, 133.3, 133.7, 133.8 (d,  $J = 2.6$  Hz), 135.2, 136.1, 139.9, 152.6, 157.9 (d,  $J = 242.0$  Hz), 197.9.  $^{19}\text{F}$  NMR (376 MHz,  $\text{CDCl}_3$ ,  $\text{CFCl}_3$ )  $\delta$  -80.08, -119.76(-119.83) (m). IR ( $\text{CH}_2\text{Cl}_2$ )  $\nu$  3210, 3080, 2955, 2919, 2850, 1678, 1599, 1515, 1439, 1397, 1255, 1175, 999, 724  $\text{cm}^{-1}$ . MS (ESI)  $m/z$  (%): 441.1 (100)  $[\text{M}+\text{Na}]^+$ ; HRMS (ESI) Calcd. For  $\text{C}_{22}\text{H}_{18}\text{F}_4\text{N}_2\text{NaO}_2$   $^+1(\text{M}+\text{Na})^+$  requires 441.1197, Found: 441.1200.

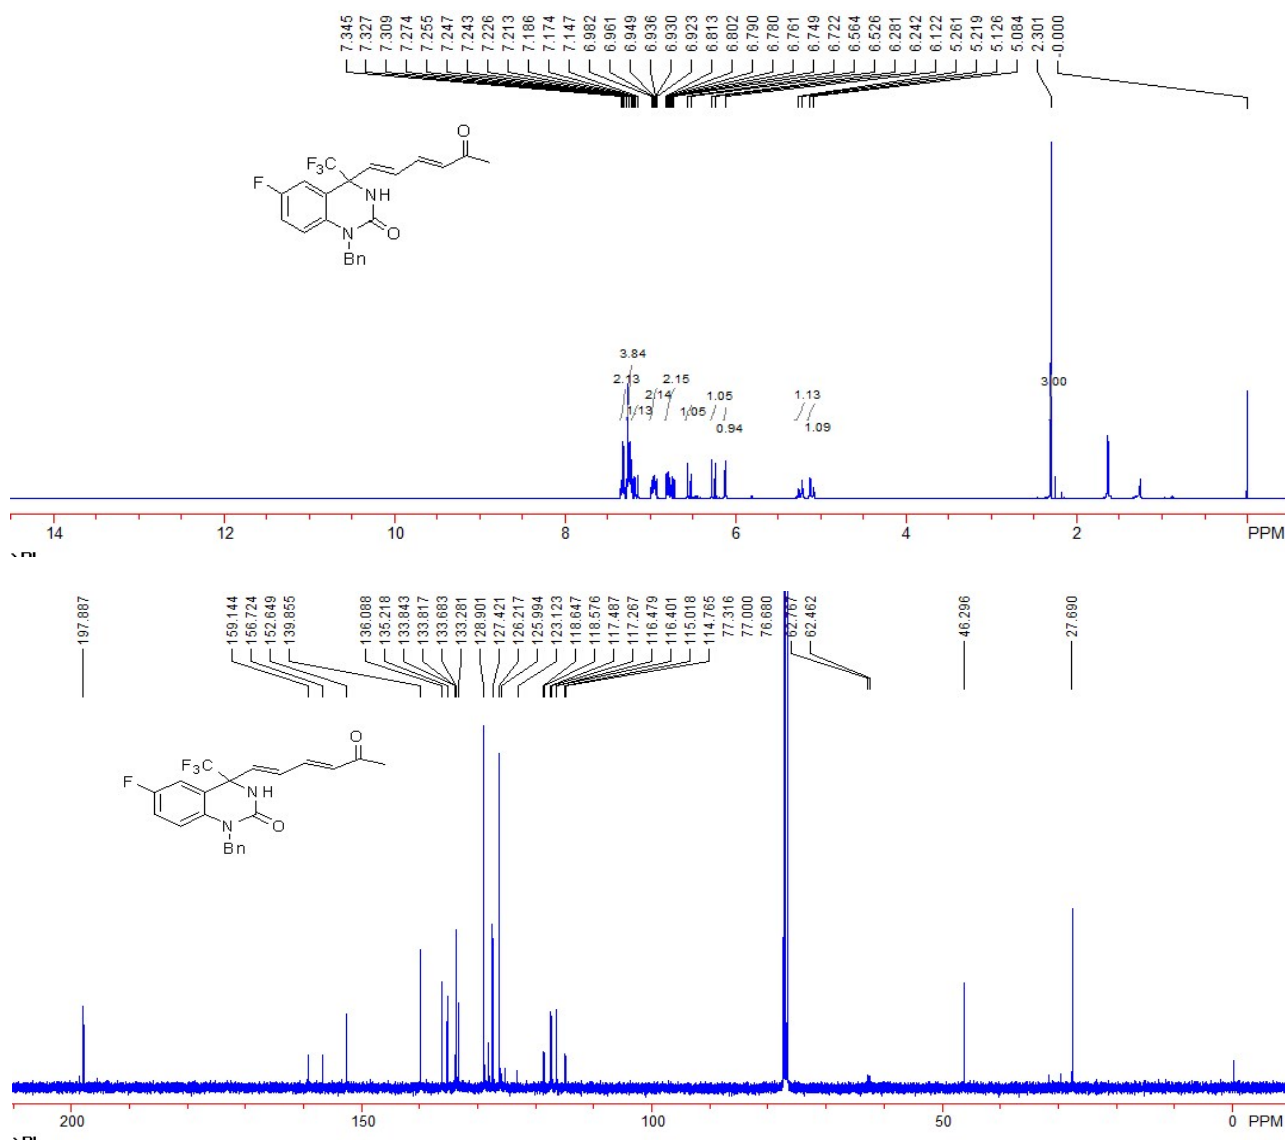

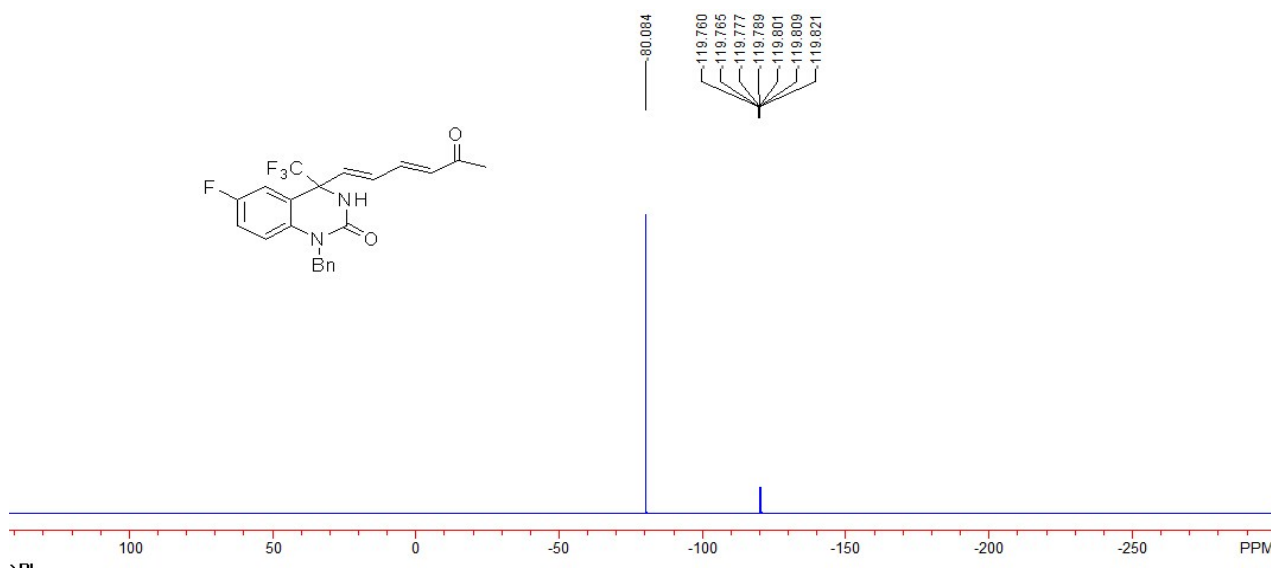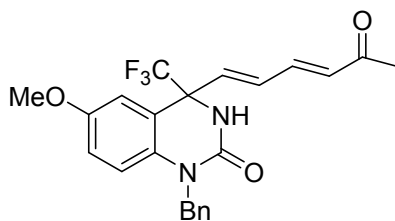

**1-benzyl-6-methoxy-4-((1E,3E)-5-oxohexa-1,3-dien-1-yl)-4-(trifluoromethyl)-3,4-dihydroquinazolin-2(1H)-one (3g).**

A white solid, 60% yield (51 mg). M.p.: 201-203 °C.  $^1\text{H}$  NMR ( $\text{CDCl}_3$ , TMS, 400 MHz)  $\delta$  2.30 (s, 3H,  $\text{CH}_3$ ), 3.73 (s, 3H,  $\text{CH}_3$ ), 5.10 (d,  $J = 16.8$  Hz, 1H,  $\text{CH}_2$ ), 5.23 (d,  $J = 16.8$  Hz, 1H,  $\text{CH}_2$ ), 5.85 (s, 1H, NH), 6.26 (d,  $J = 15.6$  Hz, 1H,  $=\text{CH}$ ), 6.58 (d,  $J = 15.6$  Hz, 1H,  $=\text{CH}$ ), 6.71-6.79 (m, 4H, ArH,  $=\text{CH}$ ), 7.18 (dd,  $J = 10.8, 15.6$  Hz, 1H,  $=\text{CH}$ ), 7.23-7.27 (m, 2H, ArH), 7.29-7.34 (m, 2H, ArH).  $^{13}\text{C}$  NMR ( $\text{CDCl}_3$ , TMS, 100 MHz)  $\delta$  27.7, 46.1, 55.6, 62.8 (q,  $J = 28.9$  Hz), 114.2, 115.0, 116.1, 118.3, 124.7 (q,  $J = 287.7$  Hz), 126.3, 127.2, 128.8, 131.0, 132.7, 133.4, 136.0, 136.5, 140.1, 152.7, 154.9, 158.8, 198.0.  $^{19}\text{F}$  NMR (376 MHz,  $\text{CDCl}_3$ ,  $\text{CFCl}_3$ )  $\delta$  -79.78. IR ( $\text{CH}_2\text{Cl}_2$ )  $\nu$  3216, 3073, 2954, 2923, 2852, 1675, 1596, 1516, 1454, 1434, 1403, 1255, 1231, 1180, 725  $\text{cm}^{-1}$ . MS (ESI)  $m/z$  (%): 431.2 (100)  $[\text{M}+\text{H}]^+$ ; HRMS (ESI) Calcd. For  $\text{C}_{23}\text{H}_{23}\text{F}_3\text{N}_2\text{O}_3^+ (\text{M}+\text{H})^+$  requires 431.1577, Found: 431.1573.

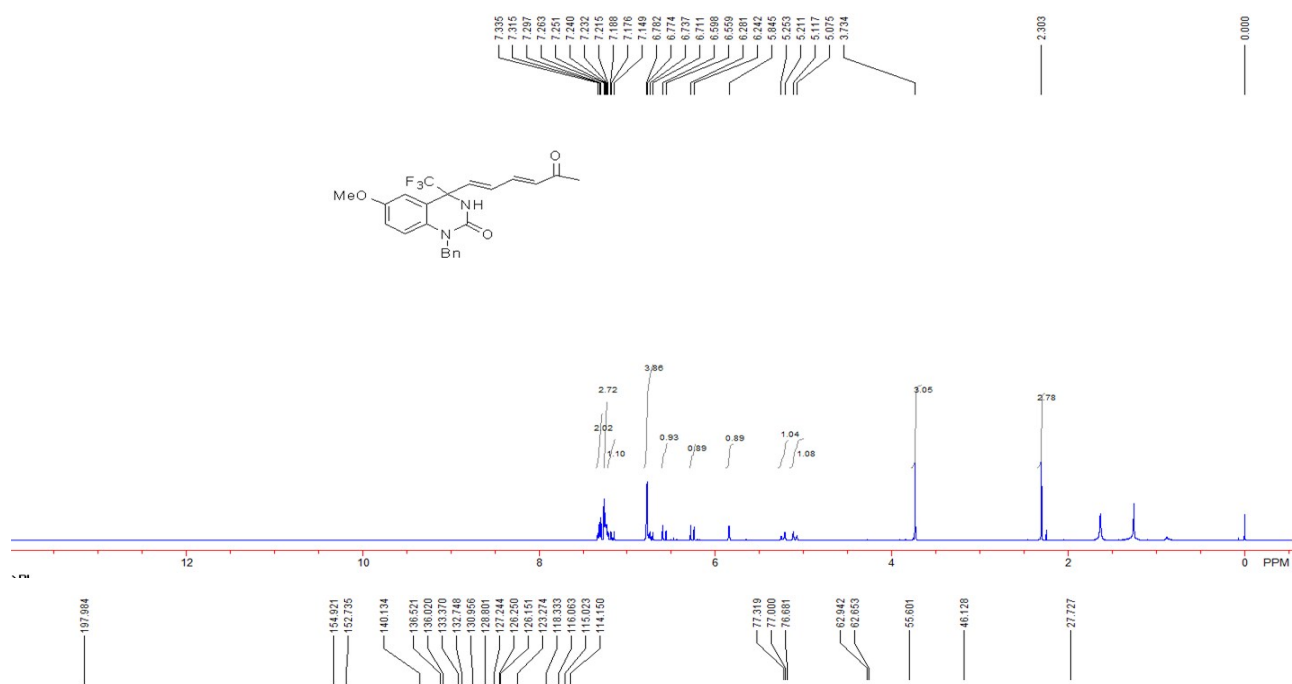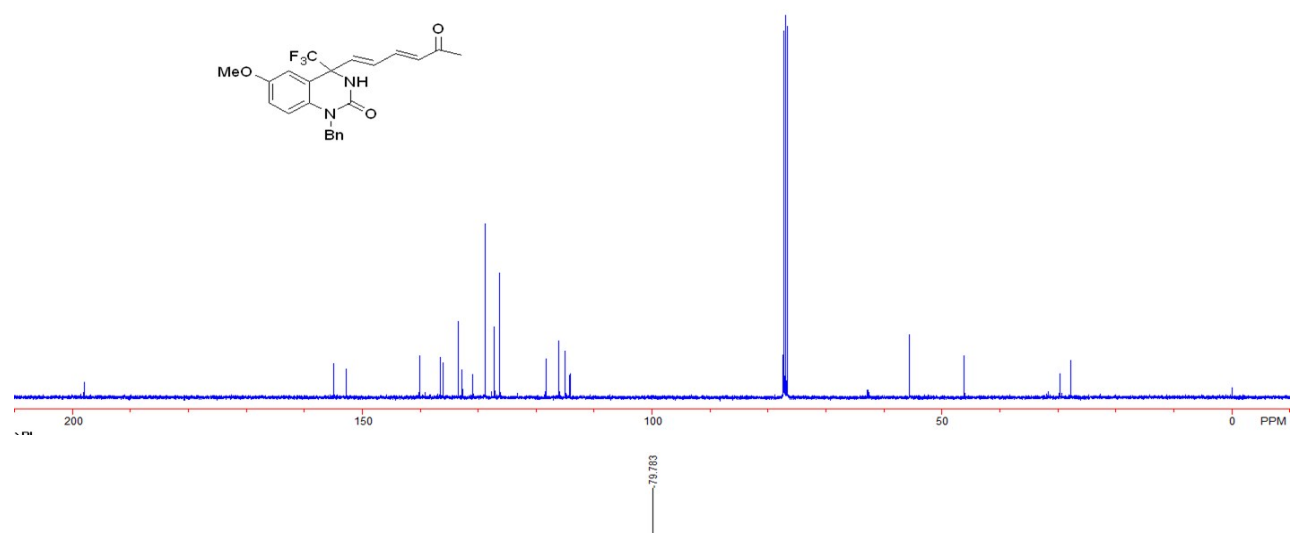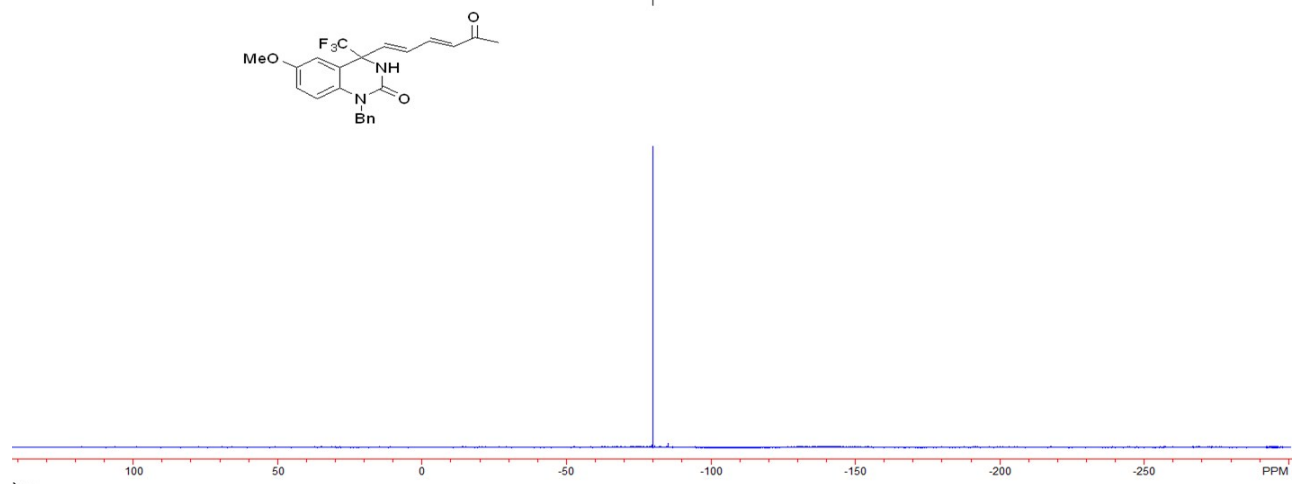

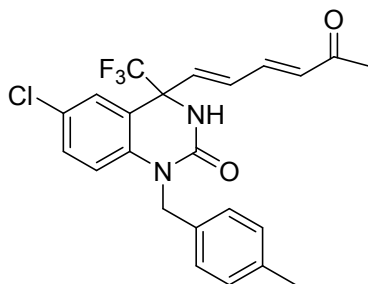

**6-chloro-1-(4-methylbenzyl)-4-((1E,3E)-5-oxohexa-1,3-dien-1-yl)-4-(trifluoromethyl)-3,4-dihydroquinazolin-2(1H)-one (3h).**

A white solid, 87% yield (78 mg). M.p.: 242-244 °C.  $^1\text{H}$  NMR ( $\text{CDCl}_3$ , TMS, 400 MHz)  $\delta$  2.25 (s, 3H,  $\text{CH}_3$ ), 2.31 (s, 3H,  $\text{CH}_3$ ), 5.02 (d,  $J = 16.4$  Hz, 1H,  $\text{CH}_2$ ), 5.20 (d,  $J = 16.0$  Hz, 1H,  $\text{CH}_2$ ), 6.20 (d,  $J = 15.6$  Hz, 1H,  $=\text{CH}$ ), 6.55 (d,  $J = 15.2$  Hz, 1H,  $=\text{CH}$ ), 6.75-6.83 (m, 2H,  $=\text{CH}$ ), 7.11-7.21 (m, 7H, ArH), 7.42 (s, 1H, NH).  $^{13}\text{C}$  NMR ( $\text{CDCl}_3$ , TMS, 100 MHz)  $\delta$  21.0, 27.5, 45.8, 62.4 (q,  $J = 29.2$  Hz), 116.3, 118.9, 124.6 (q,  $J = 286.6$  Hz), 126.2, 127.6, 127.8, 129.5, 130.3, 133.0, 133.3, 133.4, 135.0, 136.2, 137.0, 140.2, 153.1, 197.9.  $^{19}\text{F}$  NMR (376 MHz,  $\text{CDCl}_3$ ,  $\text{CFCl}_3$ )  $\delta$  -80.07. IR ( $\text{CH}_2\text{Cl}_2$ )  $\nu$  3394, 2922, 1681, 1592, 1451, 1337, 1123, 1020, 955, 912, 847, 818, 668, 626  $\text{cm}^{-1}$ . MS (ESI)  $m/z$  (%): 449.1 (100)  $[\text{M}+\text{H}]^+$ ; HRMS (ESI) Calcd. For  $\text{C}_{23}\text{H}_{21}\text{ClF}_3\text{N}_2\text{O}_2^+ (\text{M}+\text{H})^+$  requires 449.1238, Found: 449.1238.

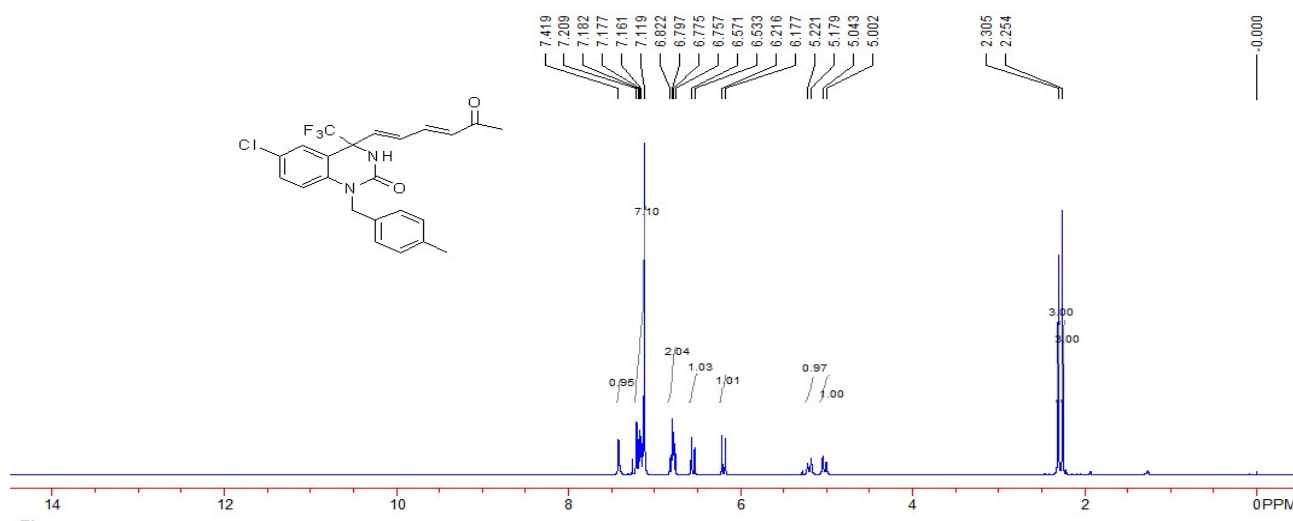

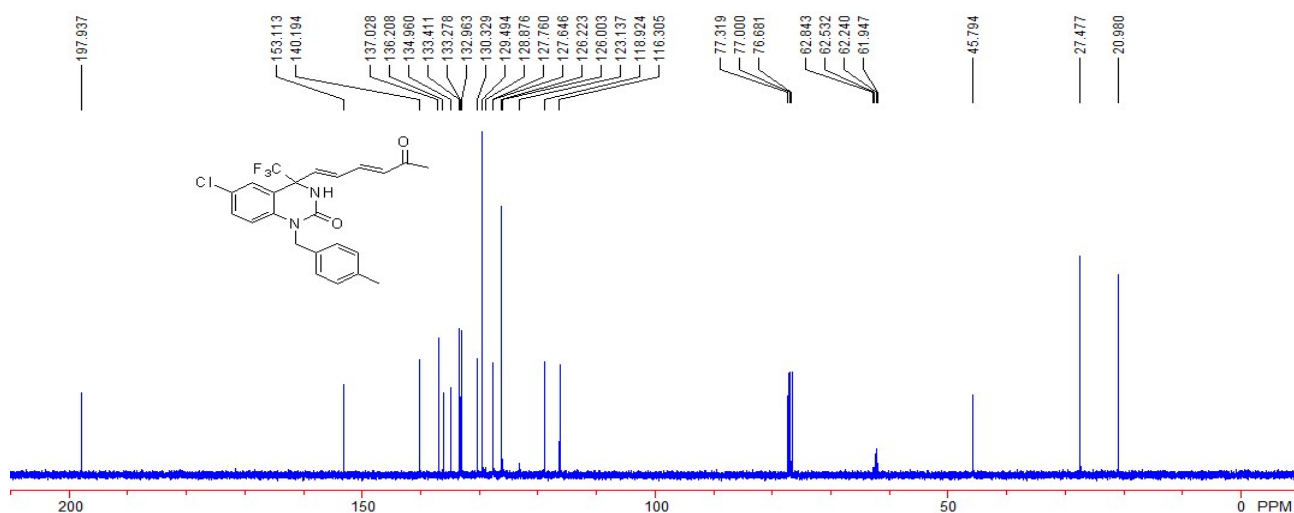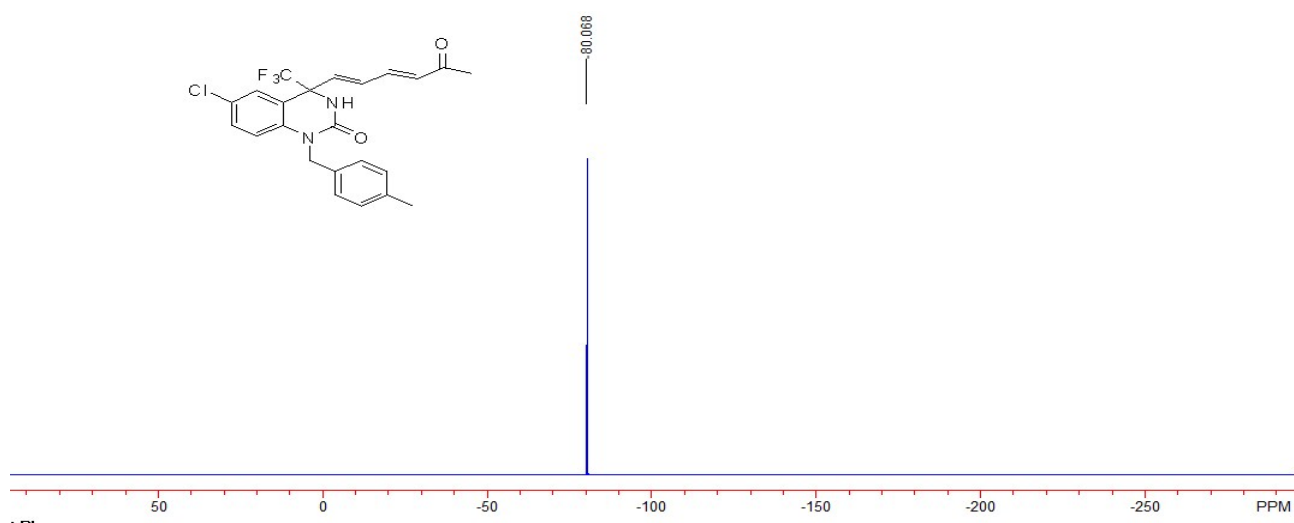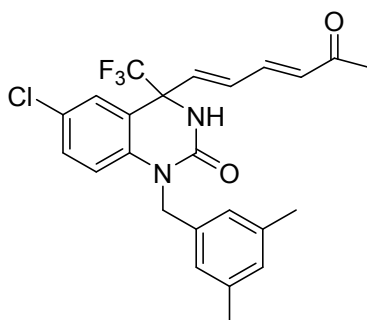

**6-chloro-1-(3,5-dimethylbenzyl)-4-((1E,3E)-5-oxohexa-1,3-dien-1-yl)-4-(trifluoromethyl)-3,4-dihydroquinazolin-2(1H)-one (3i).**

A white solid, 96% yield (87 mg). M.p.: 251-253 °C.  $^1\text{H}$  NMR ( $\text{CDCl}_3$ , TMS, 400 MHz)  $\delta$  2.27 (s, 6H,  $\text{CH}_3$ ), 2.28 (s, 3H,  $\text{CH}_3$ ), 4.98 (d,  $J = 16.8$  Hz, 1H,  $\text{CH}_2$ ), 5.28 (d,  $J = 16.0$  Hz, 1H,  $\text{CH}_2$ ), 6.23 (d,  $J = 15.6$  Hz, 1H,  $=\text{CH}$ ), 6.56 (d,  $J = 15.2$  Hz, 1H,  $=\text{CH}$ ), 6.72-6.83 (m, 5H, ArH,  $=\text{CH}$ ), 6.88 (s, 1H, NH), 7.14-7.21 (m, 3H, ArH).  $^{13}\text{C}$  NMR ( $\text{CDCl}_3$ , TMS, 100 MHz)  $\delta$  21.3, 27.6, 46.1, 62.5 (q,  $J$

= 29.7 Hz), 116.4, 118.8, 123.9, 124.6 (q,  $J = 286.9$  Hz), 127.6, 127.8, 129.1, 130.5, 133.2, 133.6, 135.1, 135.9, 136.3, 138.5, 140.1, 152.8, 197.9.  $^{19}\text{F}$  NMR (376 MHz,  $\text{CDCl}_3$ ,  $\text{CFCl}_3$ )  $\delta$  -80.04. IR ( $\text{CH}_2\text{Cl}_2$ )  $\nu$  3206, 3085, 2922, 2851, 1681, 1600, 1503, 1425, 1392, 1259, 1175, 1118, 1000, 810  $\text{cm}^{-1}$ . MS (ESI)  $m/z$  (%): 463.1 (100)  $[\text{M}+\text{H}]^+$ ; HRMS (ESI) Calcd. For  $\text{C}_{24}\text{H}_{23}\text{ClF}_3\text{N}_2\text{O}_2^+ (\text{M}+\text{H})^+$  requires 463.1395, Found: 463.1392.

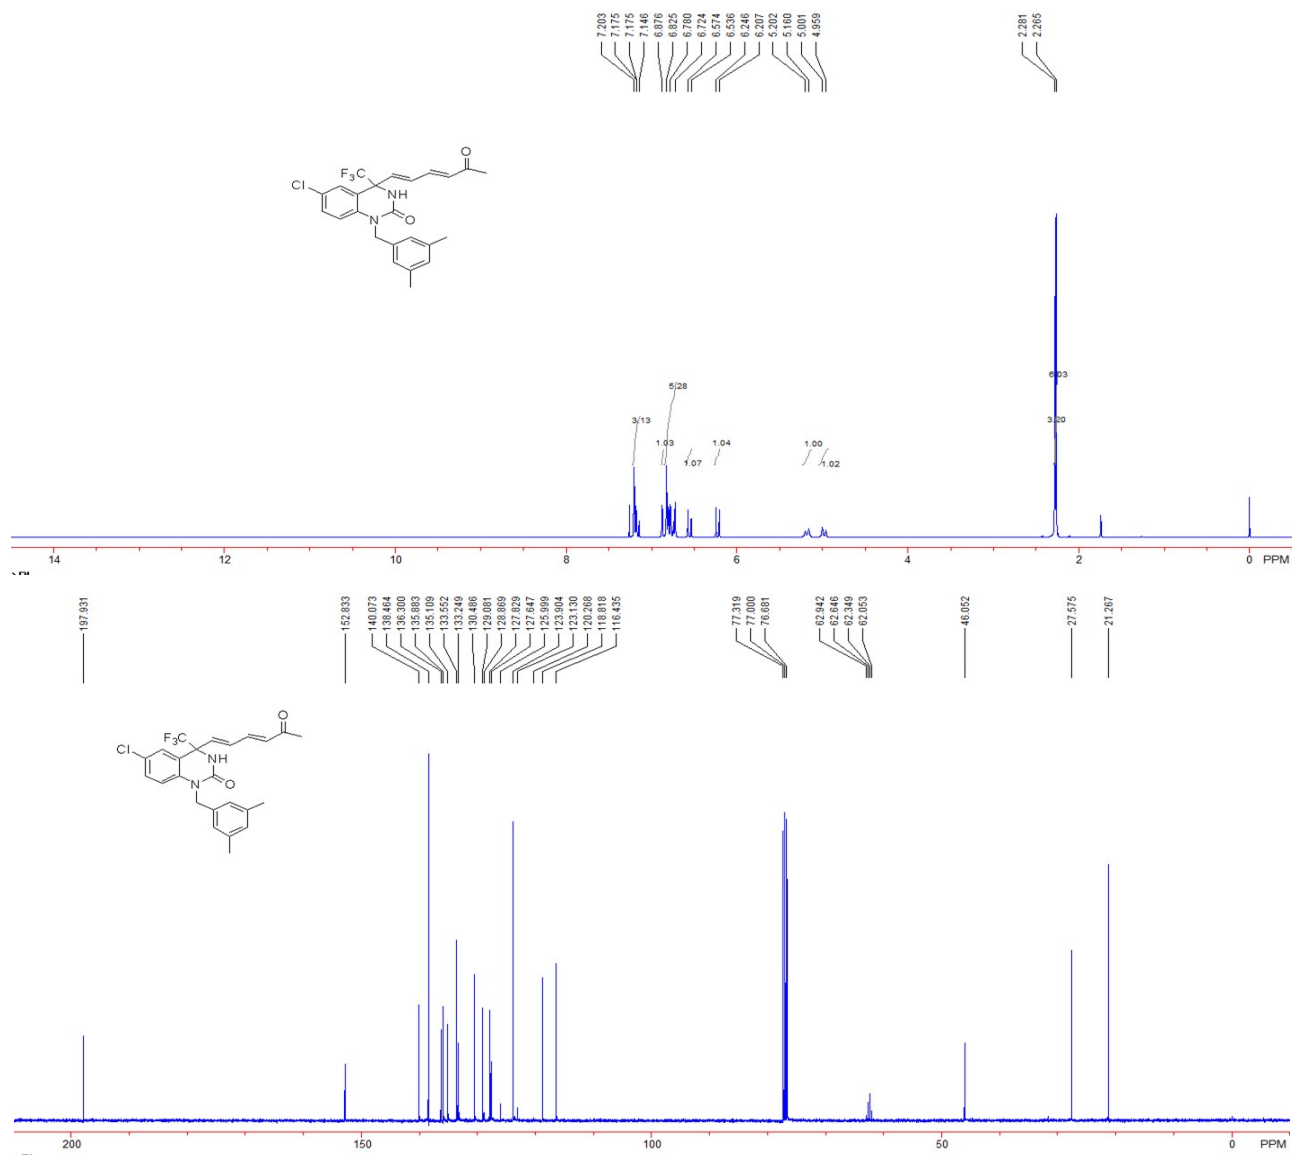

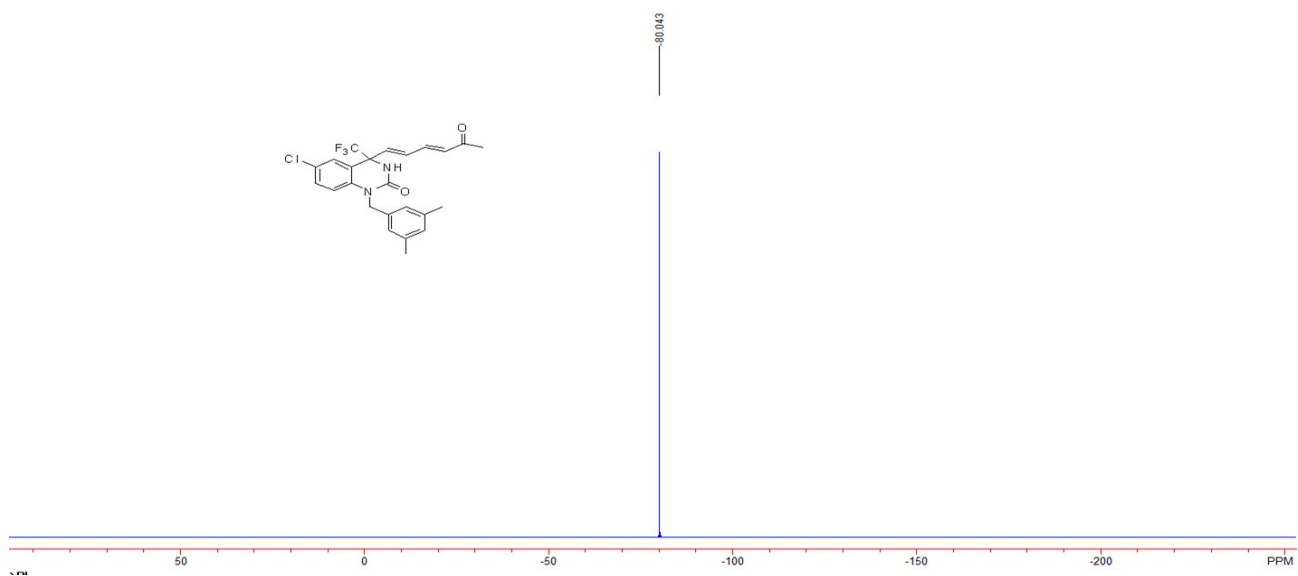

## Optimal Conditions for the Synthesis of **5a**

**Table S1.** Optimization of the reaction conditions.

**1a** + **4a**  $\xrightarrow[\text{toluene, 4Å MS}]{\text{cat.}}$  **5a**

| entry <sup>[a]</sup> | PG    | <b>1a</b> (equiv) | Cat.                                              | 4Å MS  | temp (°C) | time (h) | yield%            |
|----------------------|-------|-------------------|---------------------------------------------------|--------|-----------|----------|-------------------|
| 1                    | Bn    | 3                 | PPh <sub>3</sub>                                  | 0      | rt        | 72       | 53 <sup>[b]</sup> |
| 2                    | allyl | 3                 | PPh <sub>3</sub>                                  | 0      | rt        | 72       | 34 <sup>[b]</sup> |
| 3                    | allyl | 3                 | MePPh <sub>2</sub>                                | 0      | rt        | 72       | complex           |
| 4                    | Me    | 2                 | PPh <sub>3</sub>                                  | 0      | rt        | 42       | 35 <sup>[b]</sup> |
| 5                    | allyl | 2                 | P(4-FC <sub>6</sub> H <sub>4</sub> ) <sub>3</sub> | 0      | rt        | 24       | trace             |
| 6 <sup>[d]</sup>     | Me    | 2                 | PPh <sub>3</sub>                                  | 200 mg | 60        | 42       | 56 <sup>[c]</sup> |
| 7                    | Me    | 4                 | P(4-FC <sub>6</sub> H <sub>4</sub> ) <sub>3</sub> | 100 mg | 65        | 96       | 86 <sup>[b]</sup> |

[a] The reaction was carried out using **1a** (0.2–0.8 mmol), **4a** (0.2 mmol), cat. (0.02 mmol), in the indicated solvent (1.0 mL) in a Schlenk tube at the indicated temperature. [b] Isolated yield. [c] The reaction was carried out using **1a** (2.0 mmol), **4a** (1.0 mmol), cat. (0.25 mmol), in the indicated solvent (3 mL) in a Schlenk tube at the indicated temperature.

## General Procedure for Hex-3-yn-2-one **1a** to Isatin-derived N-Boc Ketimines **4** and Spectroscopic Data of the Products

*General procedure:* The 4Å MS was added to a Schlenk tube and heated under vacuum to remove ambient moisture and water, then filled with argon. After the Schlenk tube was returned to room temperature, isatin-derived N-Boc ketimines **4** (0.2 mmol) and P(4-FC<sub>6</sub>H<sub>4</sub>)<sub>3</sub> (13 mg, 0.04 mmol) was added. Under argon atmosphere, to a solution of isatin-derived N-Boc ketimines **4** (0.2 mmol) and P(4-FC<sub>6</sub>H<sub>4</sub>)<sub>3</sub> (13 mg, 0.04 mmol) in toluene (1.0 mL) was added the hex-3-yn-2-one **1a** (0.8 mmol) at room temperature. Then the resulting mixture was heated to 65 °C and continued stirring at 65 °C until the reaction completed (monitoring by TLC). Then the solvent was removed under reduced pressure and the residue was directly subjected to a flash column chromatography on silica gel to afford the desired products **5a-5g**.

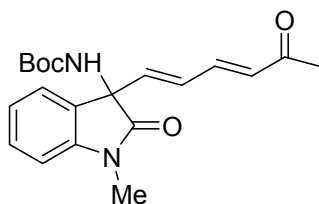

### tert-butyl (1-methyl-2-oxo-3-((1E,3E)-5-oxohexa-1,3-dien-1-yl)indolin-3-yl)carbamate (**5a**).

A white solid, 86% yield (61 mg). M.p.: 180-182 °C. <sup>1</sup>H NMR (CDCl<sub>3</sub>, TMS, 400 MHz) δ 1.25 (s, 9H, C(CH<sub>3</sub>)<sub>3</sub>), 2.23 (s, 3H, CH<sub>3</sub>), 3.24 (s, 3H, CH<sub>3</sub>), 5.64 (s, 1H, NH), 6.08 (d, *J* = 15.6 Hz, 1H, =CH), 6.13-6.23 (m, 2H, =CH), 6.89 (d, *J* = 8.0 Hz, 1H, ArH), 7.02 (ddd, *J* = 1.6, 8.0, 15.6 Hz, 1H, =CH), 7.11-7.16 (m, 1H, ArH), 7.33-7.38 (m, 2H, ArH). <sup>13</sup>C NMR (CDCl<sub>3</sub>, TMS, 100 MHz) δ 26.6, 27.3, 27.9, 63.5, 80.6, 108.5, 123.0, 123.7, 128.9, 129.3, 131.0, 132.5, 137.9, 140.9, 143.2, 153.6, 174.4, 198.1. IR (CH<sub>2</sub>Cl<sub>2</sub>) ν 3323, 2956, 2922, 2851, 1722, 1494, 1464, 1376, 1259, 1161, 1088, 852, 761, 692 cm<sup>-1</sup>. MS (ESI) *m/z* (%): 357.2 (100) [M+H]<sup>+</sup>; HRMS (ESI) Calcd. For C<sub>20</sub>H<sub>25</sub>N<sub>2</sub>O<sub>4</sub><sup>+</sup>(M+H)<sup>+</sup> requires 357.1809, Found: 357.1813.

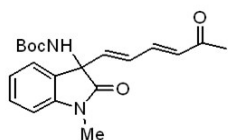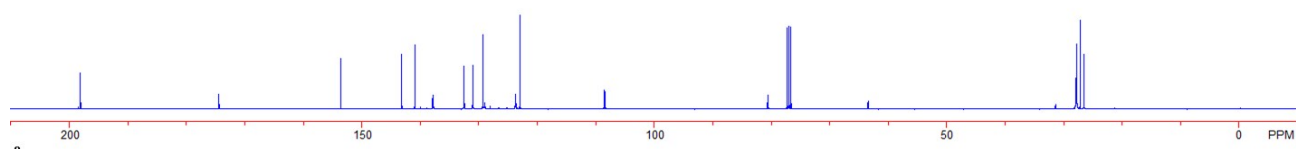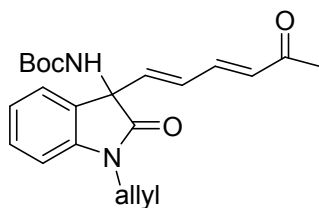

A white solid, 90% yield (64 mg). M.p.: 119-121 °C. <sup>1</sup>H NMR (CDCl<sub>3</sub>, TMS, 400 MHz) δ 1.28 (s, 9H, C(CH<sub>3</sub>)<sub>3</sub>), 2.24 (s, 3H, CH<sub>3</sub>), 4.23 (br, 1H, CH<sub>2</sub>), 4.49 (br, 1H, CH<sub>2</sub>), 5.19-5.28 (m, 2H, =CH), 5.59 (br, 1H, NH), 5.79-5.89 (m, 1H, =CH), 6.08 (d, *J* = 16.0 Hz, 1H, =CH), 6.18-6.25 (m, 2H, =CH), 6.87 (d, *J* = 7.6 Hz, 1H, ArH), 7.04 (dd, *J* = 9.2, 16.0 Hz, 1H, =CH), 7.12 (dd, *J* = 7.6, 7.6 Hz, 1H, ArH), 7.28-7.37 (m, 2H, ArH). <sup>13</sup>C NMR (CDCl<sub>3</sub>, TMS, 100 MHz) δ 27.3, 28.0, 42.6, 63.5.

80.7, 109.4, 117.5, 123.0, 123.8, 129.2, 131.0, 132.5, 138.0, 140.9, 142.4, 153.6, 174.2, 198.1. IR (CH<sub>2</sub>Cl<sub>2</sub>)  $\nu$  3322, 2970, 2922, 1708, 1670, 1611, 1487, 1466, 1363, 1250, 1159, 995, 753, 734 cm<sup>-1</sup>. MS (ESI)  $m/z$  (%): 383.2 (100) [M+H]<sup>+</sup>; HRMS (ESI) Calcd. For C<sub>22</sub>H<sub>27</sub>N<sub>2</sub>O<sub>4</sub><sup>+</sup>(M+H)<sup>+</sup> requires 383.1965, Found: 383.1965.

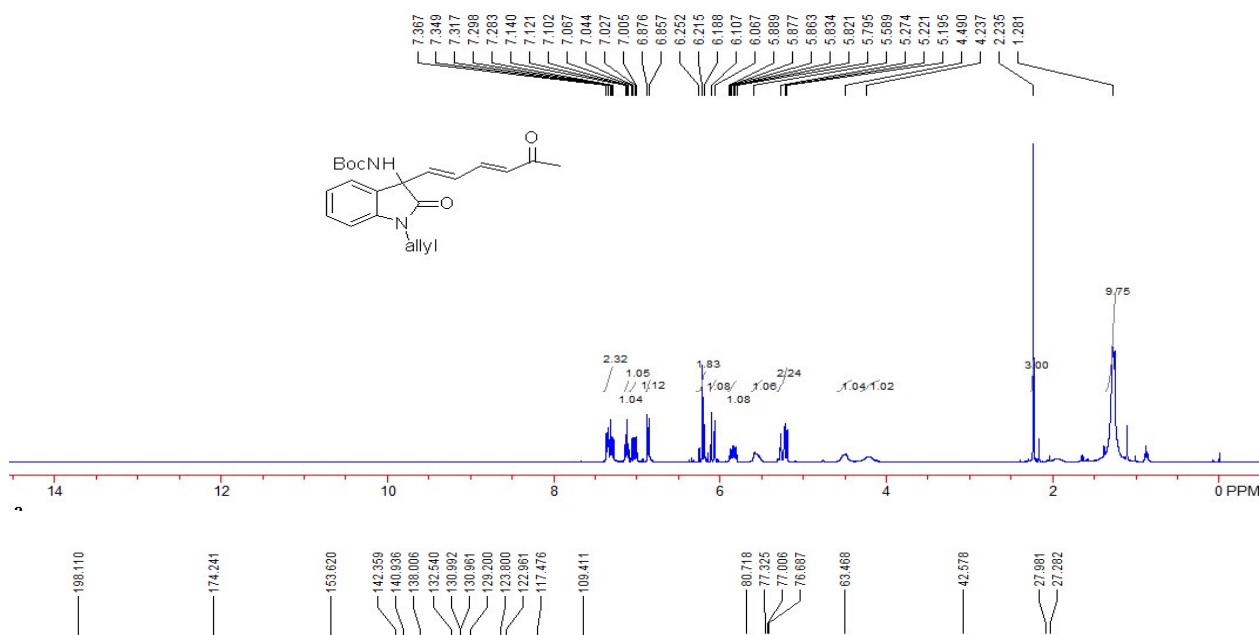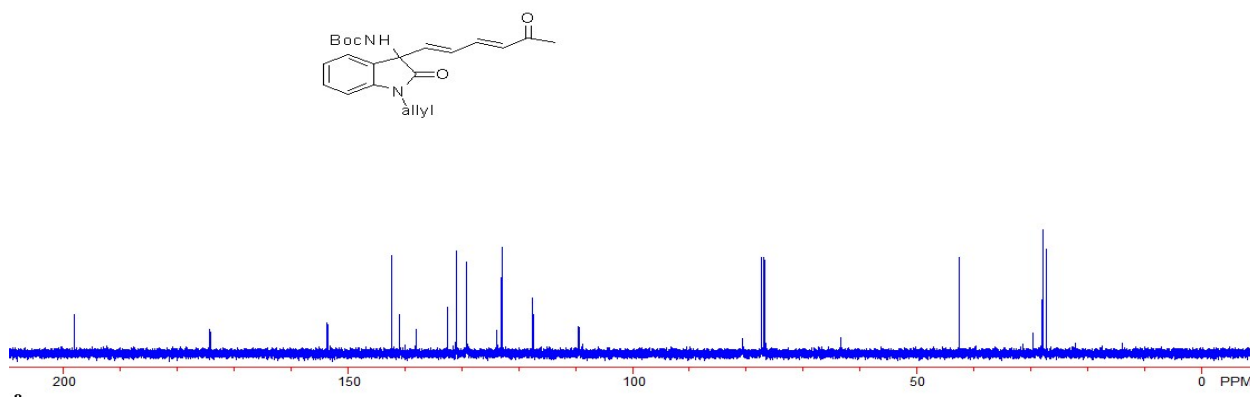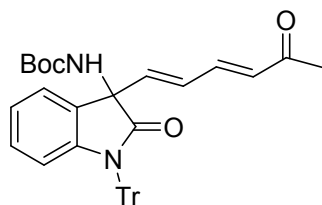

**tert-butyl (1-methyl-2-oxo-3-((1E,3E)-5-oxohexa-1,3-dien-1-yl)indolin-3-yl)carbamate (5c).**

A white solid, 84% yield (92 mg). M.p.: 235-237 °C. <sup>1</sup>H NMR (CDCl<sub>3</sub>, TMS, 400 MHz)  $\delta$  1.33 (s, 9H, C(CH<sub>3</sub>)<sub>3</sub>), 2.27 (s, 3H, CH<sub>3</sub>), 5.27 (s, 1H, NH), 6.05-6.11 (m, 2H, =CH), 6.18 (d,  $J$  = 15.2 Hz,

1H, =CH), 6.30 (d,  $J = 8.0$  Hz, 1H, ArH), 6.92 (ddd,  $J = 1.2, 8.0, 8.0$  Hz, 1H, ArH), 6.98 (dd,  $J = 7.6, 7.6$  Hz, 1H, ArH), 7.06 (dd,  $J = 10.4, 15.6$  Hz, 1H, ArH), 7.17-7.26 (m, 10H, ArH), 7.38-7.45 (m, 7H, ArH).  $^{13}\text{C}$  NMR ( $\text{CDCl}_3$ , TMS, 100 MHz)  $\delta$  27.4, 28.1, 63.6, 74.5, 80.5, 116.0, 122.6, 123.8, 126.9, 127.6, 127.7, 129.4, 130.8, 132.4, 139.3, 141.2, 141.8, 142.8, 154.0, 175.1, 198.2. IR ( $\text{CH}_2\text{Cl}_2$ )  $\nu$  3303, 2971, 2927, 2850, 1715, 1670, 1596, 1490, 1462, 1449, 1365, 1256, 1156, 1021, 998, 908, 730, 703  $\text{cm}^{-1}$ . MS (ESI)  $m/z$  (%): 602.3 (100)  $[\text{M}+\text{NH}_4]^+$ ; HRMS (ESI) Calcd. For  $\text{C}_{38}\text{H}_{40}\text{N}_3\text{O}_4^{+1}(\text{M}+\text{NH}_4)^+$  requires 602.3013, Found: 602.3015.

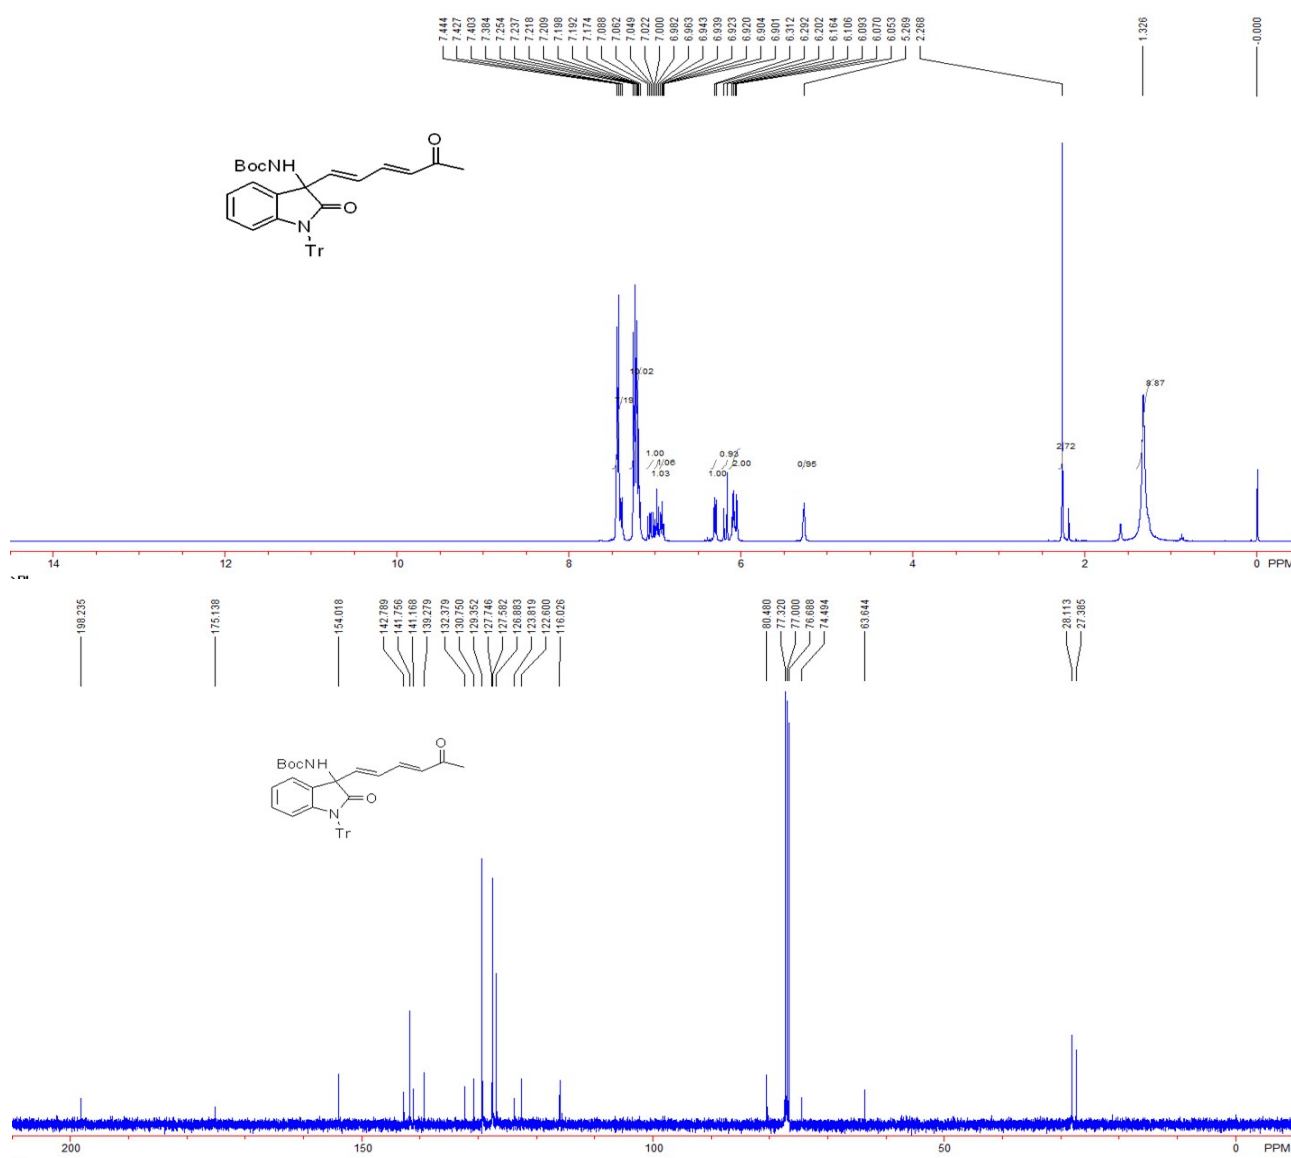

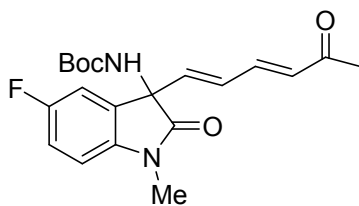

**tert-butyl (5-fluoro-1-methyl-2-oxo-3-((1E,3E)-5-oxohexa-1,3-dien-1-yl)indolin-3-yl)carbamate (5d).**

A white solid, 82% yield (61 mg). M.p.: 188-190 °C.  $^1\text{H}$  NMR ( $\text{CDCl}_3$ , TMS, 400 MHz)  $\delta$  1.30 (s, 9H,  $\text{C}(\text{CH}_3)_3$ ), 2.24 (s, 3H,  $\text{CH}_3$ ), 3.24 (s, 3H,  $\text{CH}_3$ ), 5.56 (s, 1H, NH), 6.12 (d,  $J = 15.6$ , 1H,  $=\text{CH}$ ), 6.17-6.23 (m, 2H,  $=\text{CH}$ ), 6.82 (dd,  $J = 4.0$ , 8.8 Hz, 1H, ArH), 6.98-7.09 (m, 2H,  $=\text{CH}$ , ArH), 7.12 (dd,  $J = 2.4$ , 8.8 Hz, 1H, ArH).  $^{13}\text{C}$  NMR ( $\text{CDCl}_3$ , TMS, 100 MHz)  $\delta$  26.8, 27.4, 28.0, 63.6, 80.9, 109.2 (d,  $J = 4.5$  Hz), 111.9 (d,  $J = 3.0$  Hz), 112.1 (d,  $J = 4.5$  Hz), 115.6 (d,  $J = 23.8$  Hz), 131.3, 132.8, 137.1, 139.2 (d,  $J = 2.3$  Hz), 140.6, 153.5, 159.4 (d,  $J = 241.0$  Hz), 174.2, 198.0.  $^{19}\text{F}$  NMR (376 MHz,  $\text{CDCl}_3$ ,  $\text{CFCl}_3$ )  $\delta$  -119.53. IR ( $\text{CH}_2\text{Cl}_2$ )  $\nu$  3289, 2925, 2849, 1723, 1593, 1497, 1469, 1366, 1266, 1235, 1159, 1116, 830, 813, 733, 702, 661  $\text{cm}^{-1}$ . MS (ESI)  $m/z$  (%): 293.1 (100)  $[\text{M}+\text{NH}_4]^+$ ; HRMS (ESI) Calcd. For  $\text{C}_{20}\text{H}_{27}\text{FN}_3\text{O}_4^{+1}(\text{M}+\text{NH}_4)^+$  requires 392.1980, Found: 392.1980.

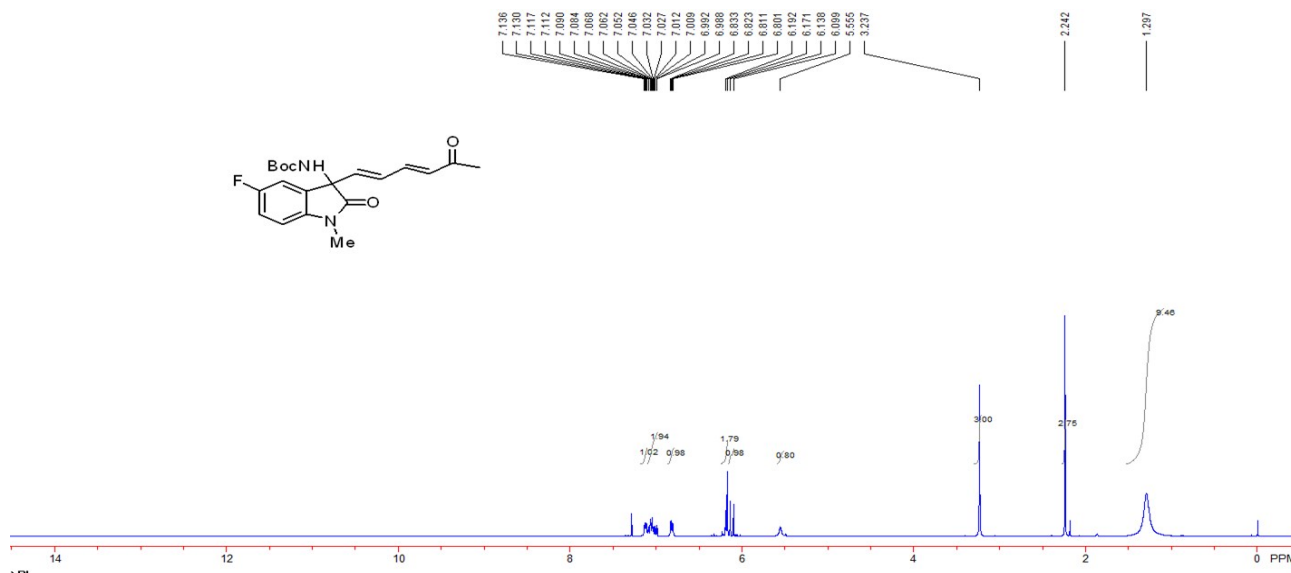

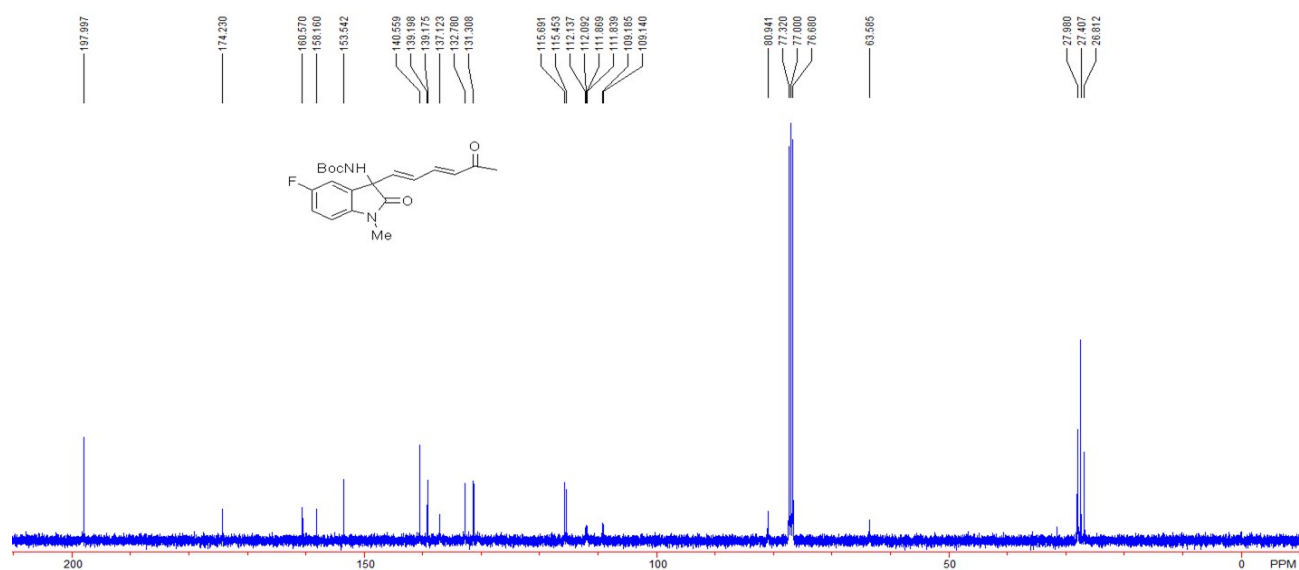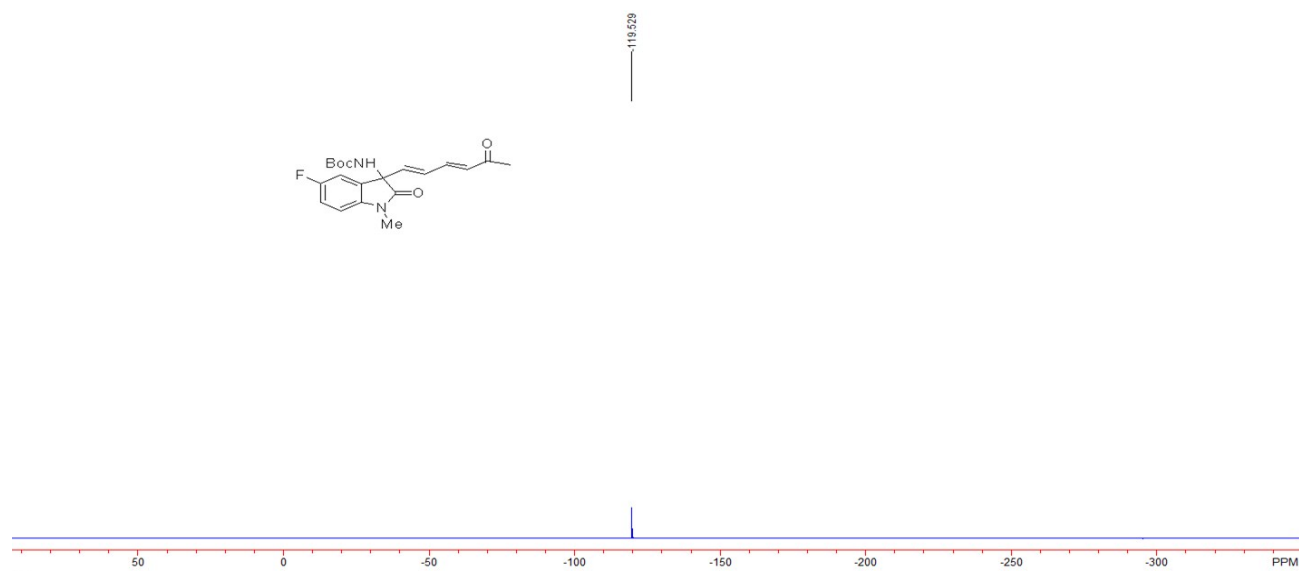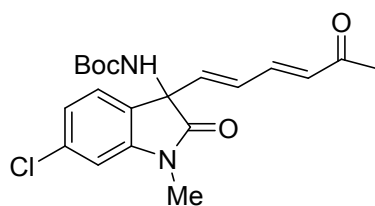

**tert-butyl (6-chloro-1-methyl-2-oxo-3-((1E,3E)-5-oxohexa-1,3-dien-1-yl)indolin-3-yl)carbamate (5e).**

A white solid, 92% yield (72 mg). M.p.: 236-238 °C. <sup>1</sup>H NMR (CDCl<sub>3</sub>, TMS, 400 MHz) δ 1.29 (s, 9H, C(CH<sub>3</sub>)<sub>3</sub>), 2.24 (s, 3H, CH<sub>3</sub>), 3.23 (s, 3H, CH<sub>3</sub>), 5.57 (s, 1H, NH), 6.11 (d, *J* = 15.6 Hz, 1H, =CH), 6.15-6.21 (m, 2H, =CH), 6.89 (d, *J* = 1.6 Hz, 1H, ArH), 7.01 (ddd, *J* = 3.2, 6.4, 15.6 Hz, 1H, =CH), 7.11 (dd, *J* = 2.0, 8.0 Hz, 1H, ArH), 7.26 (d, *J* = 8.0 Hz, 1H, ArH). <sup>13</sup>C NMR (CDCl<sub>3</sub>, TMS, 100 MHz) δ 26.8, 27.4, 28.0, 63.1, 80.9, 109.4, 122.8, 124.7, 127.3, 131.3, 132.7, 135.1, 137.1,

140.5, 144.5, 153.5, 174.4, 198.0. IR (CH<sub>2</sub>Cl<sub>2</sub>)  $\nu$  3316, 2980, 2917, 2848, 1724, 1671, 1610, 1595, 1489, 1364, 1263, 1160, 1116, 997, 812, 701 cm<sup>-1</sup>. MS (ESI)  $m/z$  (%): 391.1 (100) [M+H]<sup>+</sup>; HRMS (ESI) Calcd. For C<sub>20</sub>H<sub>24</sub>ClN<sub>2</sub>O<sub>4</sub><sup>+</sup>(M+NH<sub>4</sub>)<sup>+</sup> requires 391.1419, Found: 391.1417.

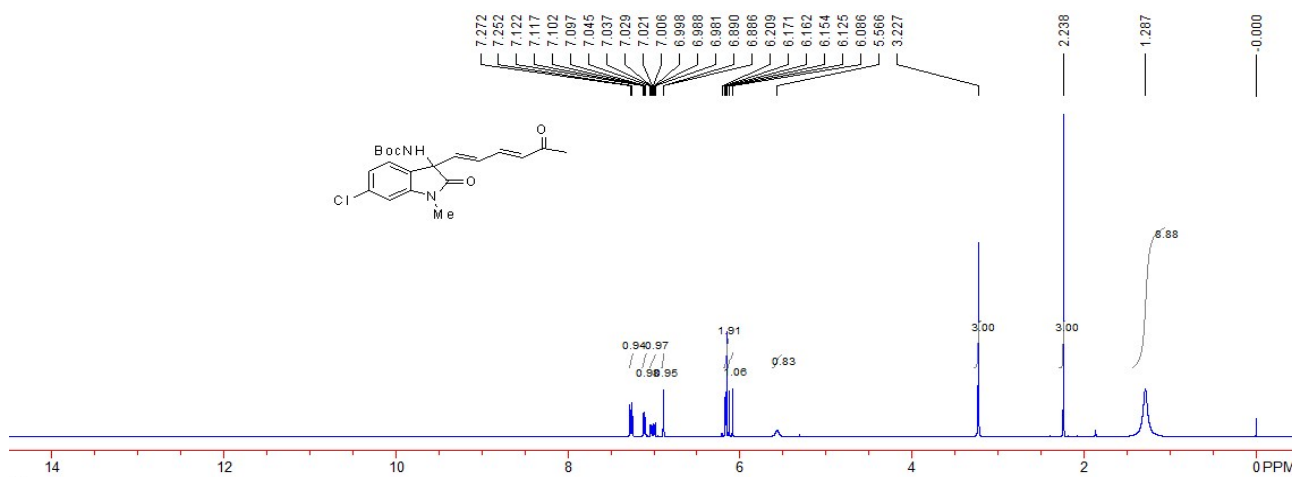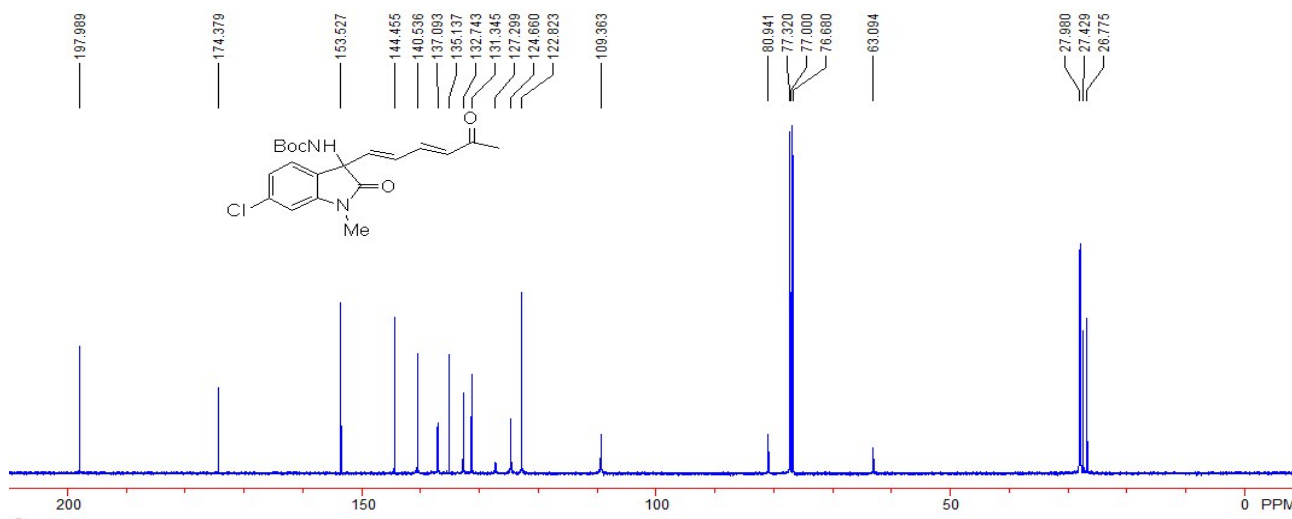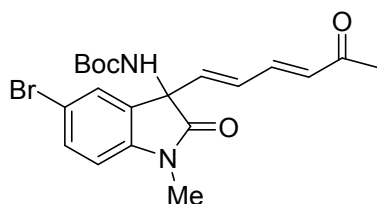

**tert-butyl (5-bromo-1-methyl-2-oxo-3-((1E,3E)-5-oxohexa-1,3-dien-1-yl)indolin-3-yl)carbamate (5f).**

A white solid, 88% yield (77 mg). M.p.: 289-290 °C. <sup>1</sup>H NMR (CDCl<sub>3</sub>, TMS, 400 MHz)  $\delta$  1.31 (s, 9H, C(CH<sub>3</sub>)<sub>3</sub>), 2.25 (s, 3H, CH<sub>3</sub>), 3.23 (s, 3H, CH<sub>3</sub>), 5.32 (s, 1H, NH), 6.10-6.24 (m, 3H, =CH), 6.77 (d,  $J$  = 8.0 Hz, 1H, ArH), 7.01 (dd,  $J$  = 10.0, 15.6 Hz, 1H, =CH), 7.45-7.50 (m, 2H, ArH). <sup>13</sup>C NMR

(CDCl<sub>3</sub>, TMS, 100 MHz)  $\delta$  26.8, 27.5, 28.0, 63.3, 81.1, 110.1, 115.7, 126.9, 131.5, 132.3, 133.0, 136.8, 140.4, 142.3, 153.5, 173.9, 198.0. IR (CH<sub>2</sub>Cl<sub>2</sub>)  $\nu$  3315, 2959, 2925, 2846, 1727, 1671, 1607, 1488, 1364, 1254, 1162, 1116, 999, 810 cm<sup>-1</sup>. MS (ESI)  $m/z$  (%): 452.1 (100) [M+NH<sub>4</sub>]<sup>+</sup>; HRMS (ESI) Calcd. For C<sub>20</sub>H<sub>27</sub>BrN<sub>3</sub>O<sub>4</sub><sup>+</sup>(M+NH<sub>4</sub>)<sup>+</sup> requires 452.1179, Found: 452.1178.

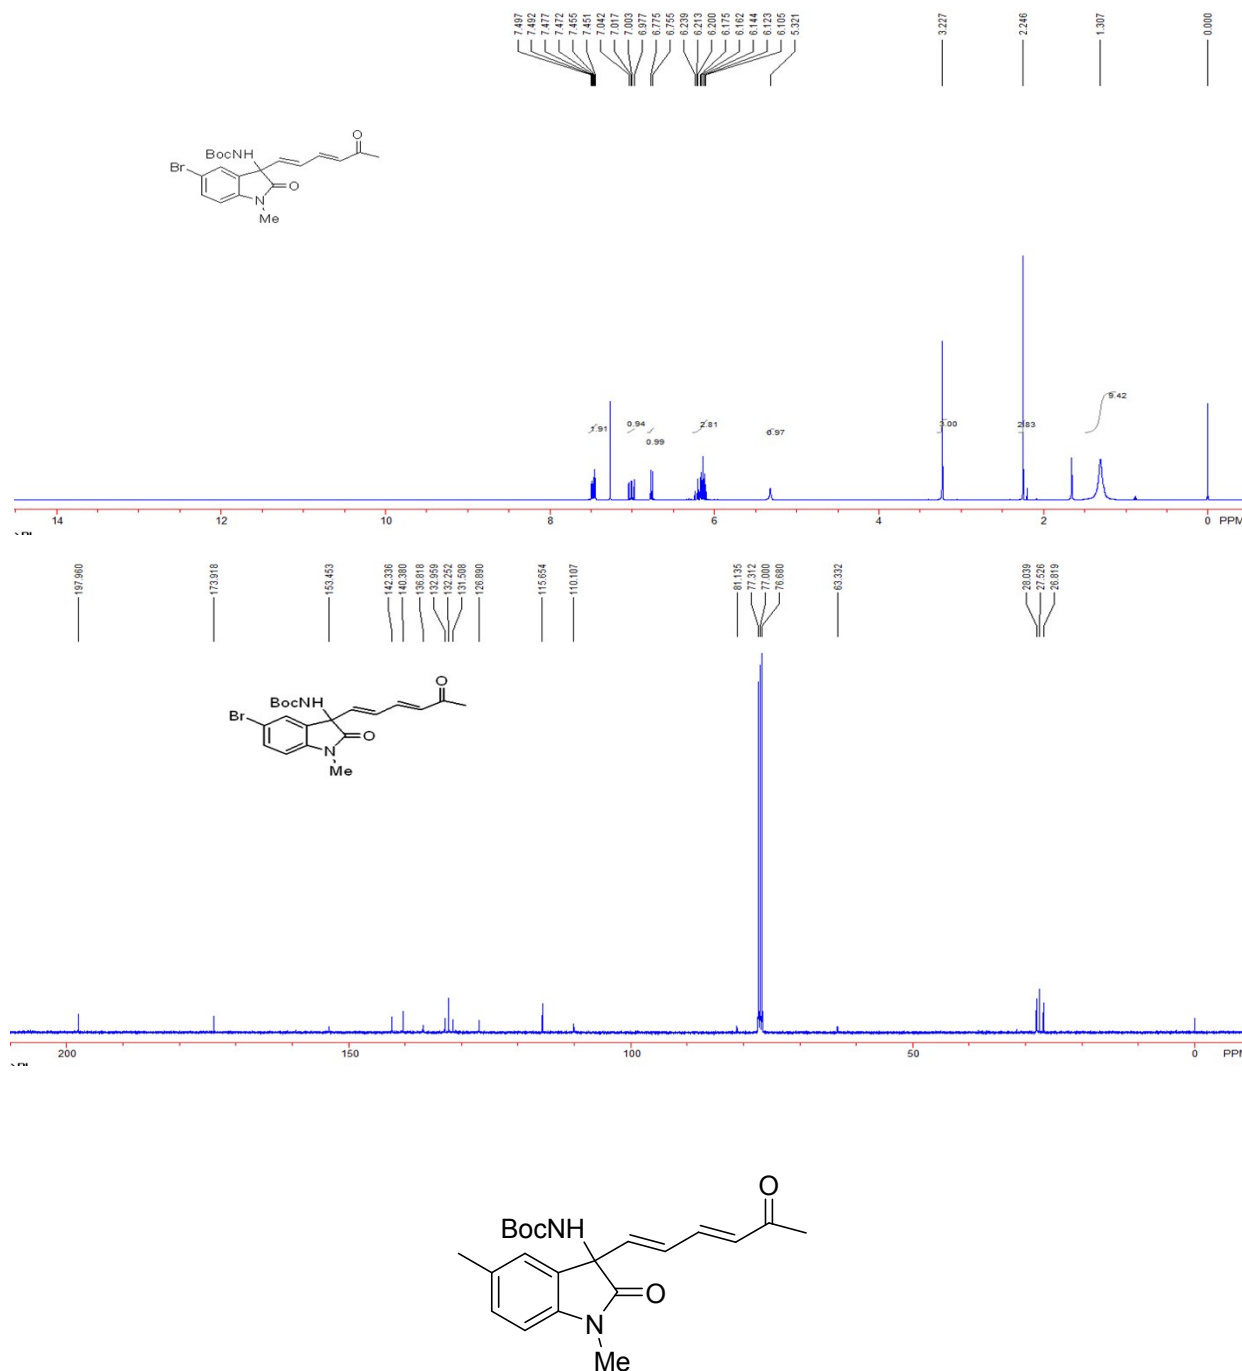

**tert-butyl (1,5-dimethyl-2-oxo-3-((1E,3E)-5-oxohexa-1,3-dien-1-yl)indolin-3-yl)carbamate (5g).**

A white solid, 64% yield (47 mg). M.p.: 142-144 °C. <sup>1</sup>H NMR (CDCl<sub>3</sub>, TMS, 400 MHz)  $\delta$  1.27 (s, 9H, C(CH<sub>3</sub>)<sub>3</sub>), 2.23 (s, 3H, CH<sub>3</sub>), 2.37 (s, 3H, CH<sub>3</sub>), 3.22 (s, 3H, CH<sub>3</sub>), 5.44 (s, 1H, NH), 6.10 (d, *J*

= 16.0 Hz, 1H, =CH), 6.17-6.20 (m, 2H, =CH), 6.76 (d,  $J$  = 7.6 Hz, 1H, ArH), 6.98-7.06 (m, 1H, =CH), 7.13-7.17 (m, 2H, ArH).  $^{13}\text{C}$  NMR ( $\text{CDCl}_3$ , TMS, 100 MHz)  $\delta$  21.1, 26.7, 27.3, 28.0, 63.6, 80.7, 108.3, 124.6, 129.6, 130.9, 132.5, 132.6, 138.1, 140.8, 141.0, 153.7, 174.3, 198.1. IR ( $\text{CH}_2\text{Cl}_2$ )  $\nu$  3318, 2974, 2926, 1708, 1670, 1602, 1499, 1363, 1281, 1251, 1165, 997, 810, 732  $\text{cm}^{-1}$ . MS (ESI)  $m/z$  (%): 371.2 (100)  $[\text{M}+\text{H}]^+$ ; HRMS (ESI) Calcd. For  $\text{C}_{21}\text{H}_{27}\text{N}_2\text{O}_4^+ (\text{M}+\text{NH}_4)^+$  requires 371.1965, Found: 371.1964.

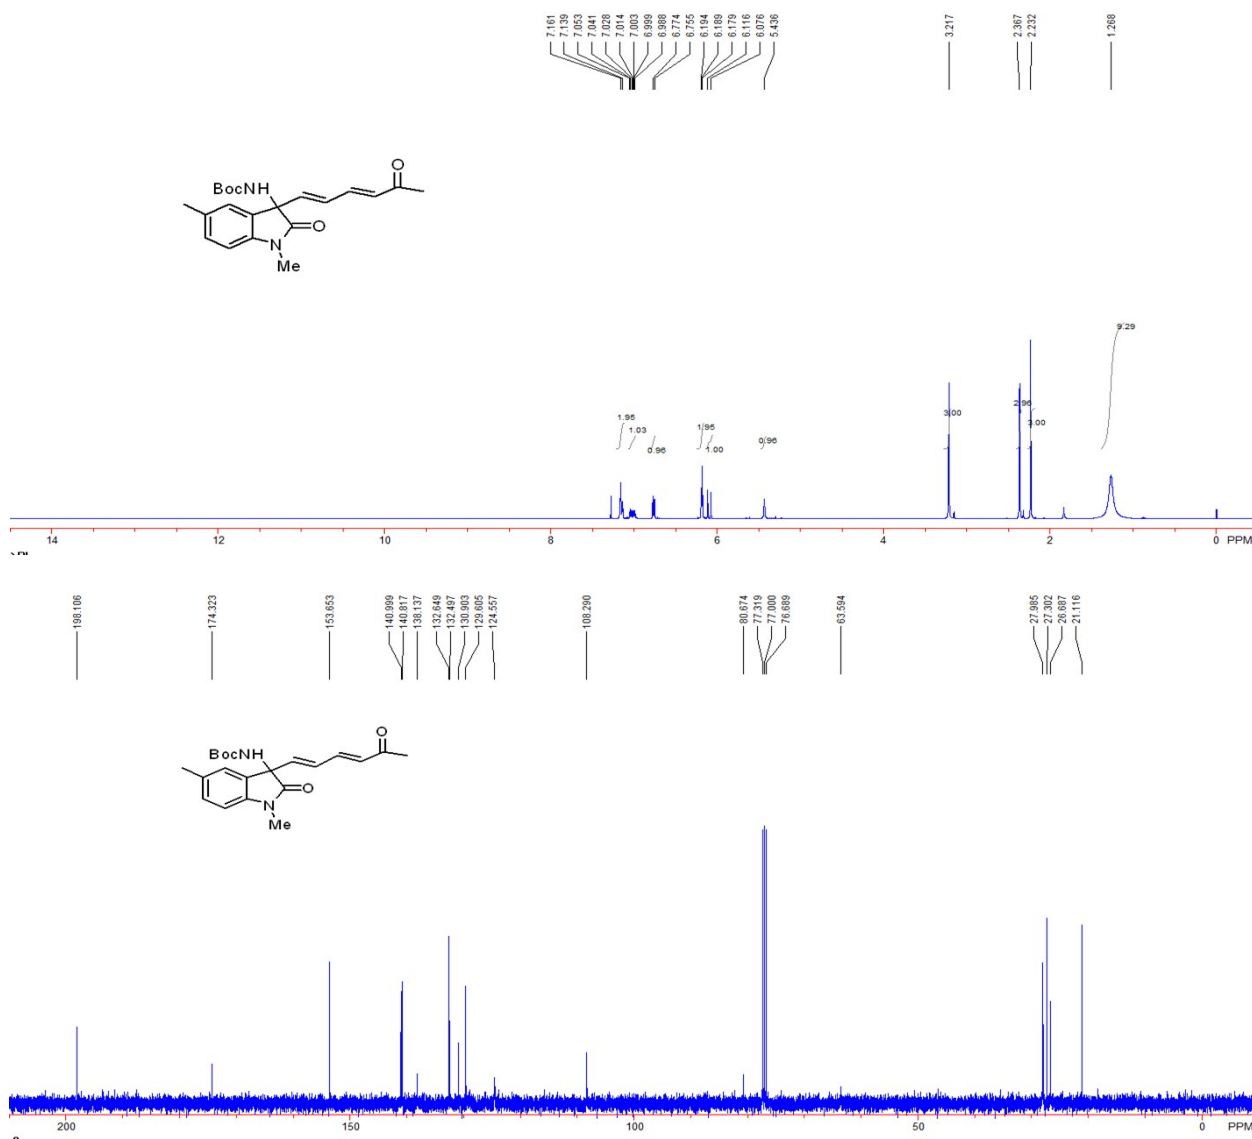

## Optimal Conditions for the Synthesis of 7a

**Table S2.** Optimization of the reaction conditions.

| entry <sup>[a]</sup> | Cat.                                              | 4AMS | temp (°C) | time (h) | yield%            |
|----------------------|---------------------------------------------------|------|-----------|----------|-------------------|
| 1                    | PPh <sub>3</sub>                                  | 0    | rt        | 144      | 30 <sup>[b]</sup> |
| 2                    | PPh <sub>3</sub>                                  | 100  | 65        | 72       | 24 <sup>[b]</sup> |
| 3                    | MePPh <sub>2</sub>                                | 100  | rt        | 144      | complex           |
| 4                    | PPh <sub>3</sub>                                  | 100  | rt        | 144      | 14 <sup>[b]</sup> |
| 5                    | P(4-FC <sub>6</sub> H <sub>4</sub> ) <sub>3</sub> | 100  | rt        | 144      | 24 <sup>[b]</sup> |

[a] The reaction was carried out using **1a** (0.3 mmol), **6a** (0.2 mmol), cat. (0.02 mmol), in the indicated solvent (1.0 mL) in a Schlenk tube at the indicated temperature. [b] Isolated yield.

## General Procedure for Hex-3-yn-2-one **1a** to N-tosyl $\alpha$ -Ketimine Esters **6a** and Spectroscopic Data of the Products

*General procedure:* Under argon atmosphere, to a solution of N-tosyl  $\alpha$ -ketimine esters **6a** (0.2 mmol) and PPh<sub>3</sub> (11 mg, 0.04 mmol) in toluene (1.0 mL) was added the hex-3-yn-2-one **1a** (0.3 mmol) at room temperature. Then the resulting mixture was stirred at 65 °C until the reaction completed (monitoring by TLC). Then the solvent was removed under reduced pressure and the residue was directly subjected to a flash column chromatography on silica gel to afford the desired product **7a**.

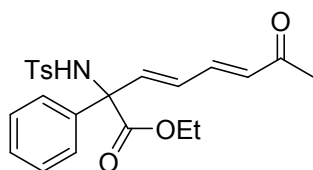

### Ethyl (3E,5E)-2-((4-methylphenyl)sulfonamido)-7-oxo-2-phenylocta-3,5-dienoate (**7a**).

A white solid, 30% yield (62 mg). M.p.: 156-158 °C. <sup>1</sup>H NMR (CDCl<sub>3</sub>, TMS, 400 MHz)  $\delta$  1.18 (t,  $J$  = 7.2 Hz, 3H, CH<sub>3</sub>), 2.28 (s, 3H, CH<sub>3</sub>), 2.34 (s, 3H, CH<sub>3</sub>), 4.21 (q,  $J$  = 7.2 Hz, 2H, CH<sub>2</sub>), 6.14 (d,  $J$  = 16.0 Hz, 1H, =CH), 6.20 (s, 1H, NH), 6.56-6.68 (m, 2H, =CH), 7.04 (d,  $J$  = 8.0 Hz, 2H, ArH), 7.11-7.18 (m, 5H, =CH), 7.19-7.24 (m, 1H, ArH), 7.27 (d,  $J$  = 8.0 Hz, 2H, ArH). <sup>13</sup>C NMR (CDCl<sub>3</sub>, TMS, 100 MHz)  $\delta$  13.7, 21.4, 27.6, 63.2, 68.6, 126.6, 127.6, 128.3, 128.5, 129.0, 131.9, 132.2, 136.2, 139.1, 139.3, 141.3, 142.7, 170.7, 198.3. IR (CH<sub>2</sub>Cl<sub>2</sub>)  $\nu$  3255, 2923, 1733, 1663, 1590, 1329, 1246,

1155, 1092, 999, 813, 698, 662  $\text{cm}^{-1}$ . MS (ESI)  $m/z$  (%): 445.2 (100)  $[\text{M}+\text{NH}_4]^+$ ; HRMS (ESI) Calcd. For  $\text{C}_{23}\text{H}_{29}\text{N}_2\text{O}_5\text{S}^+(\text{M}+\text{NH}_4)^+$  requires 445.1792, Found: 445.1792.

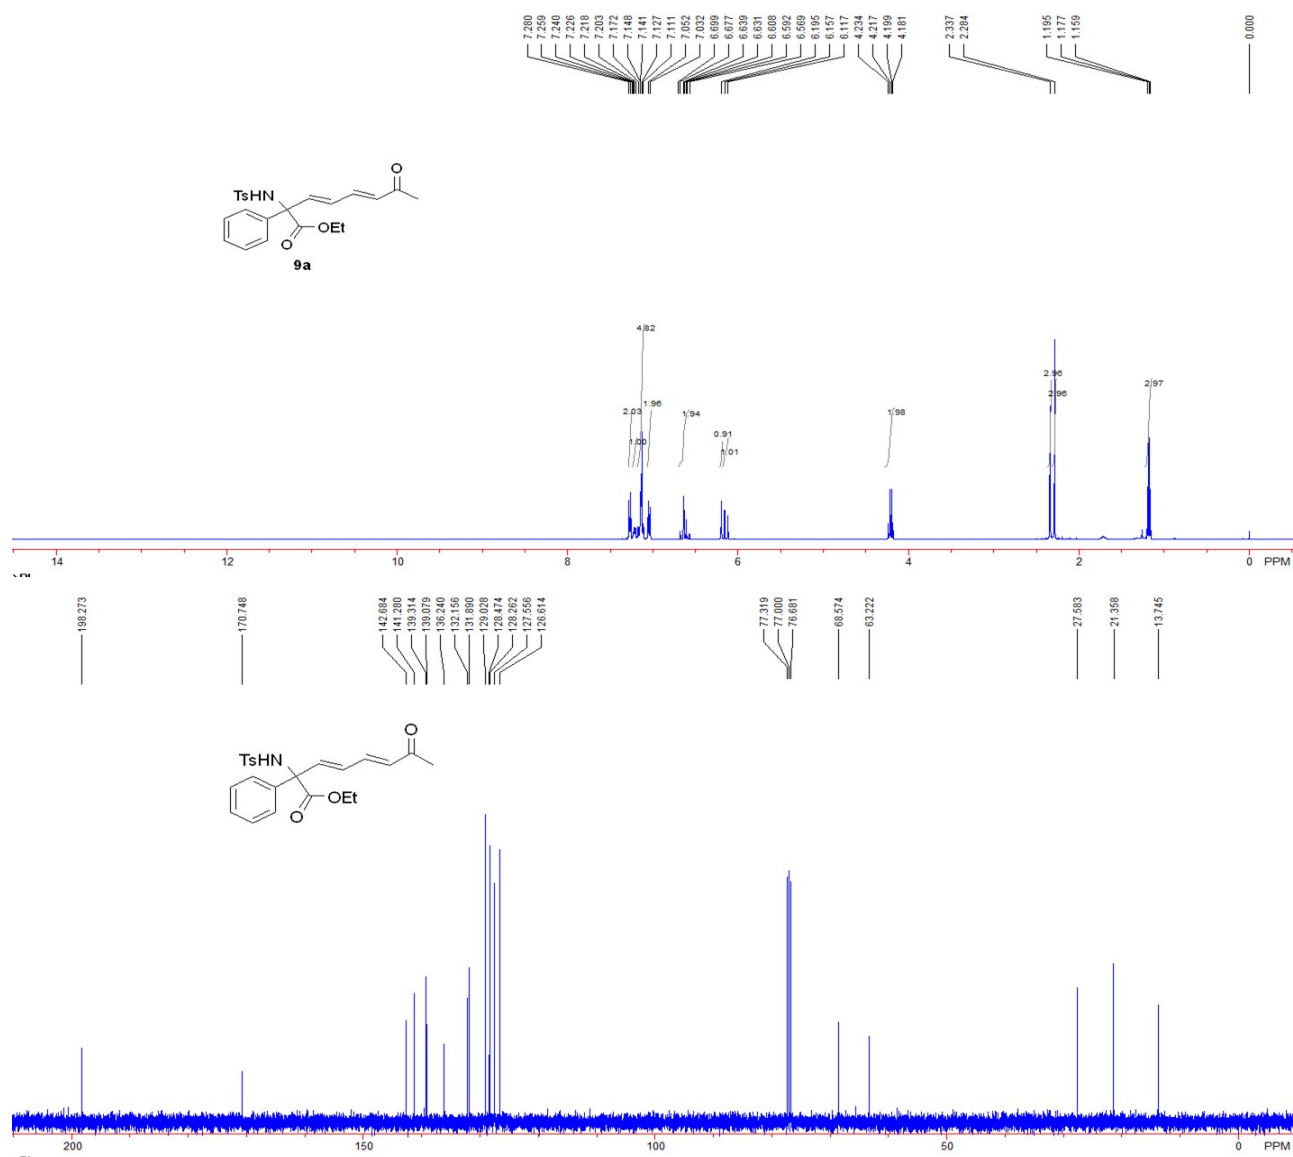

# Screening of Chiral Phosphine Catalysts of $\delta$ -Carbon Activation of Hex-3-yn-2-one **1a** and Addition to Cyclic Trifluoromethyl Ketimine **2a**.

**Table S3.** Screening of chiral phosphine catalysts in the enantioselective addition of **1a** and **2a**.<sup>a</sup>

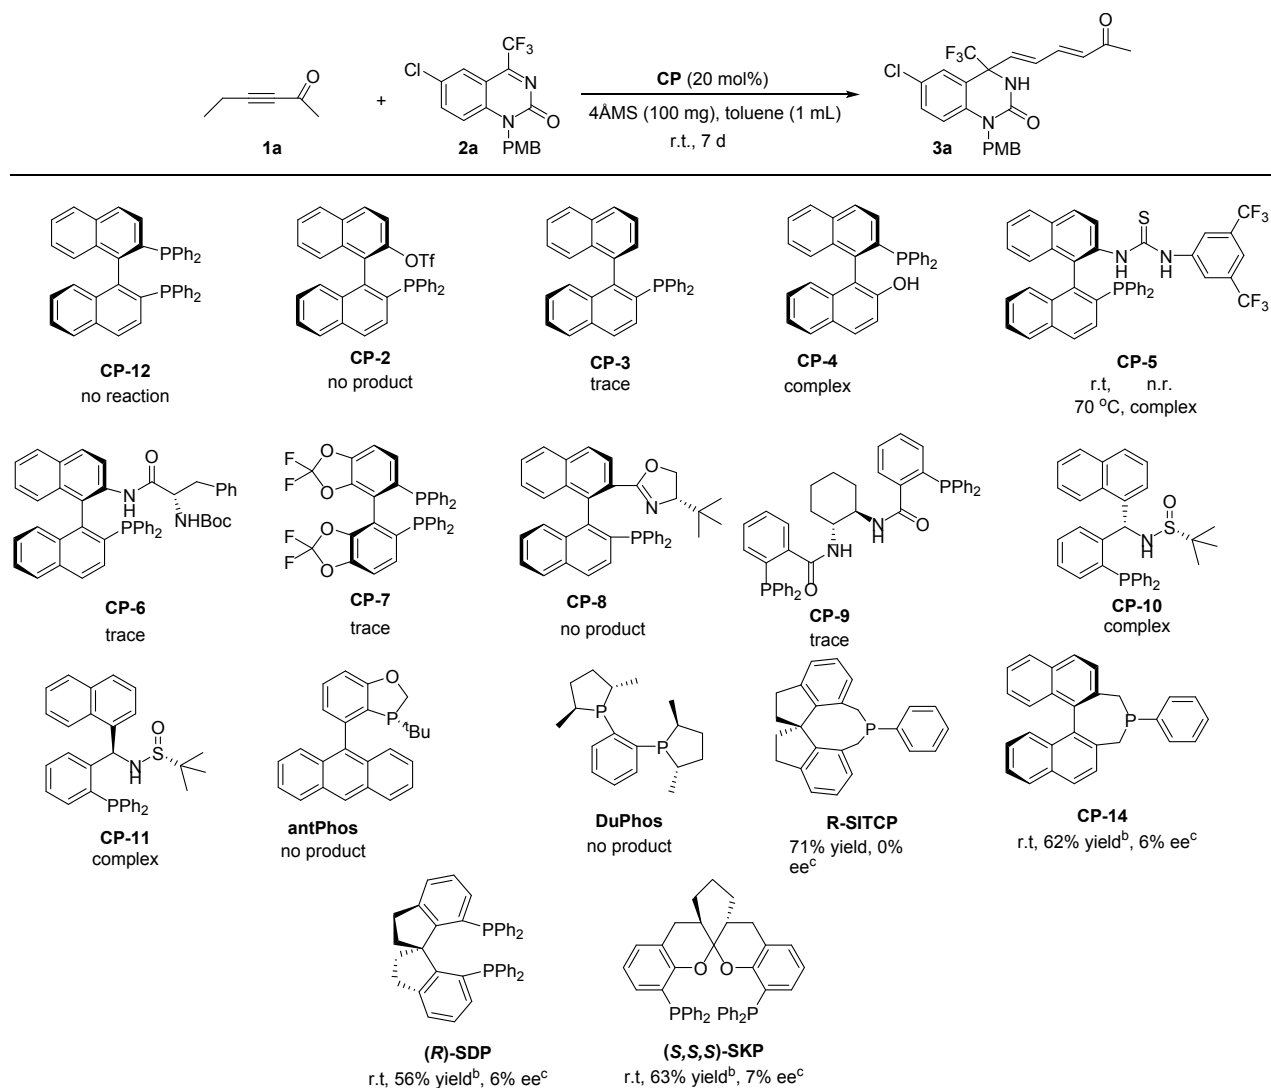

<sup>a</sup> Reactions were performed with **1a** (0.40 mmol) and **2a** (0.20 mmol) in the presence of 20 mol% of **CP** in toluene (1 mL) for 7 days. <sup>b</sup> Isolated yields.

<sup>c</sup> Determined by chiral HPLC analysis.

## General Procedure for Alkynones **1** to Cyclic Trifluoromethyl Ketimines **2a** and Spectroscopic Data of the Products

*General procedure:* The 4Å MS was added to a Schlenk tube and heated under vacuum to remove ambient moisture and water, then filled with argon. After the Schlenk tube was returned to room temperature, cyclic trifluoromethyl ketimines **2a** (0.2 mmol) and P(4-FC<sub>6</sub>H<sub>4</sub>)<sub>3</sub> (13 mg, 0.04 mmol) was added. Under argon atmosphere, to a solution of cyclic trifluoromethyl ketimines **2** (0.2 mmol) and P(4-FC<sub>6</sub>H<sub>4</sub>)<sub>3</sub> (13 mg, 0.04 mmol) in toluene (1.0 mL) was added the alkynones **1** (0.8 mmol) at room temperature. Then the resulting mixture was heated to 65 °C and continued stirring at 65 °C until the reaction completed (monitoring by TLC). Then the solvent was removed under reduced pressure and the residue was directly subjected to a flash column chromatography on silica gel to afford the desired products **3j** and **3k**.

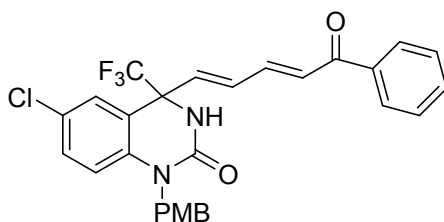

### 6-chloro-1-(4-methoxybenzyl)-4-((1E,3E)-5-oxo-5-phenylpenta-1,3-dien-1-yl)-4-(trifluoromethyl)-3,4-dihydroquinazolin-2(1H)-one (**3j**).

A white solid, 88% yield (93 mg). M.p.: 221-223 °C. <sup>1</sup>H NMR (CDCl<sub>3</sub>, TMS, 400 MHz) δ 3.76 (s, 3H, CH<sub>3</sub>), 5.03 (d, *J* = 16.4 Hz, 1H, CH<sub>2</sub>), 5.20 (d, *J* = 16.0 Hz, 1H, CH<sub>2</sub>), 6.09 (s, 1H, NH), 6.60 (d, *J* = 15.6 Hz, 1H, =CH), 6.81-6.91 (m, 4H, ArH, =CH), 7.11-7.12 (m, 5H, ArH, =CH), 7.44-7.52 (m, 3H, ArH, =CH), 7.58-7.61 (m, 1H, ArH), 7.92-7.95 (m, 1H, ArH). <sup>13</sup>C NMR (CDCl<sub>3</sub>, TMS, 100 MHz) δ 45.6, 62.6 (q, *J* = 29.6 Hz), 114.3, 116.4, 118.9, 124.5 (q, *J* = 286.9 Hz), 127.6, 127.78, 127.82, 128.1, 128.5, 128.7, 129.1, 130.5, 133.2, 133.5, 135.5, 136.1, 137.4, 141.2, 152.8, 158.9, 189.9. <sup>19</sup>F NMR (376 MHz, CDCl<sub>3</sub>, CFCl<sub>3</sub>) δ -79.95. IR (CH<sub>2</sub>Cl<sub>2</sub>) ν 3205, 3065, 2952, 2924, 2853, 1678, 1599, 1513, 1503, 1428, 1247, 1173, 1013, 734, 695 cm<sup>-1</sup>. MS (ESI) *m/z* (%): 527.1 (100) [M+H]<sup>+</sup>; HRMS (ESI) Calcd. For C<sub>28</sub>H<sub>23</sub>ClF<sub>3</sub>N<sub>2</sub>O<sub>3</sub><sup>+</sup>(M+H)<sup>+</sup> requires 527.1344, Found: 527.1343.

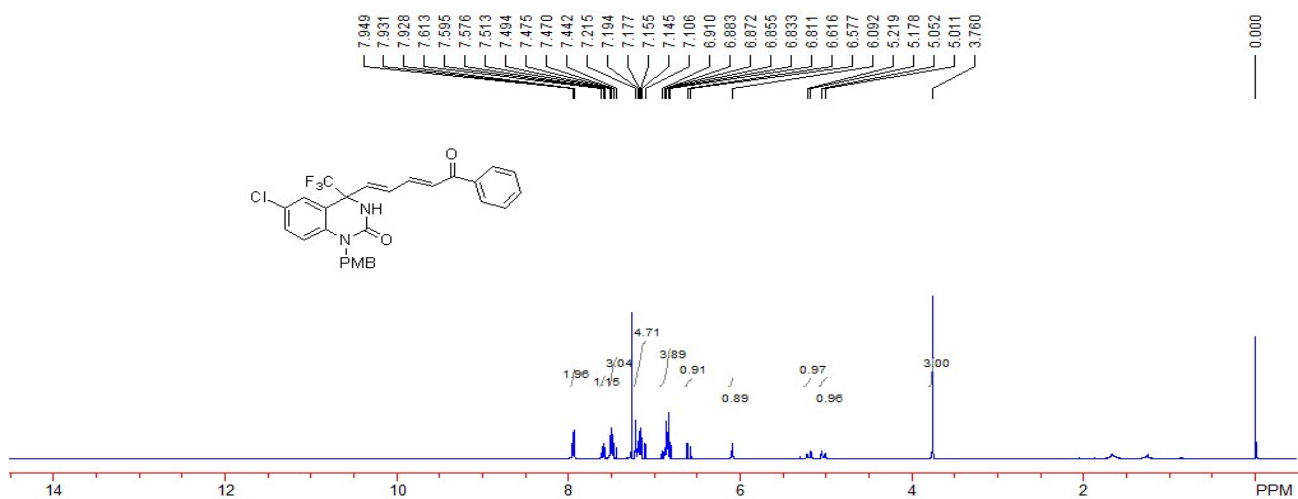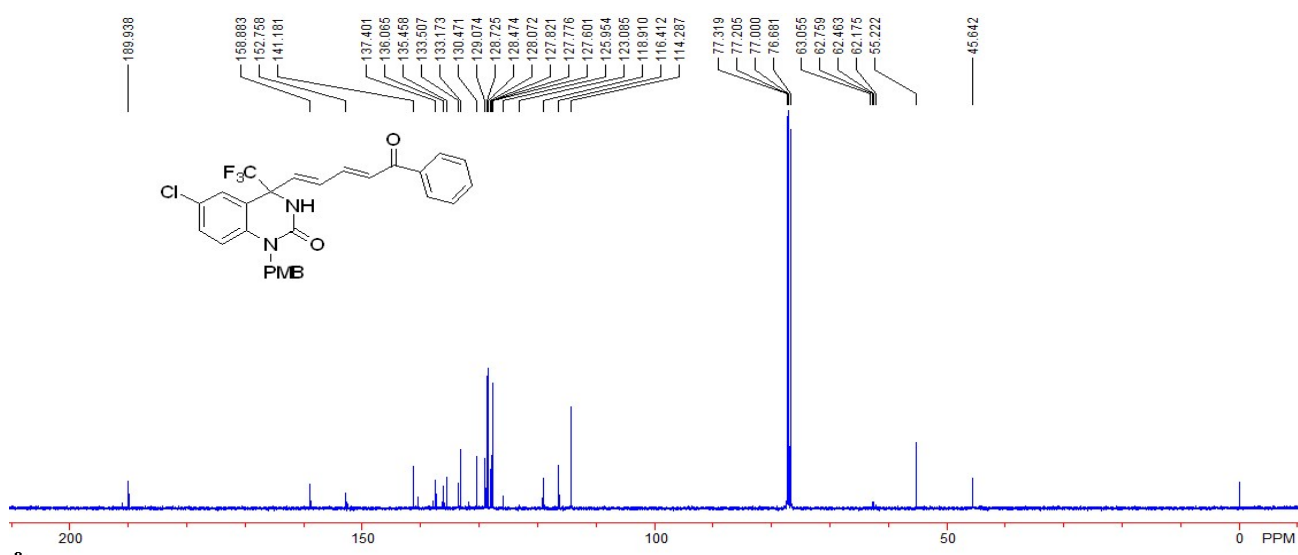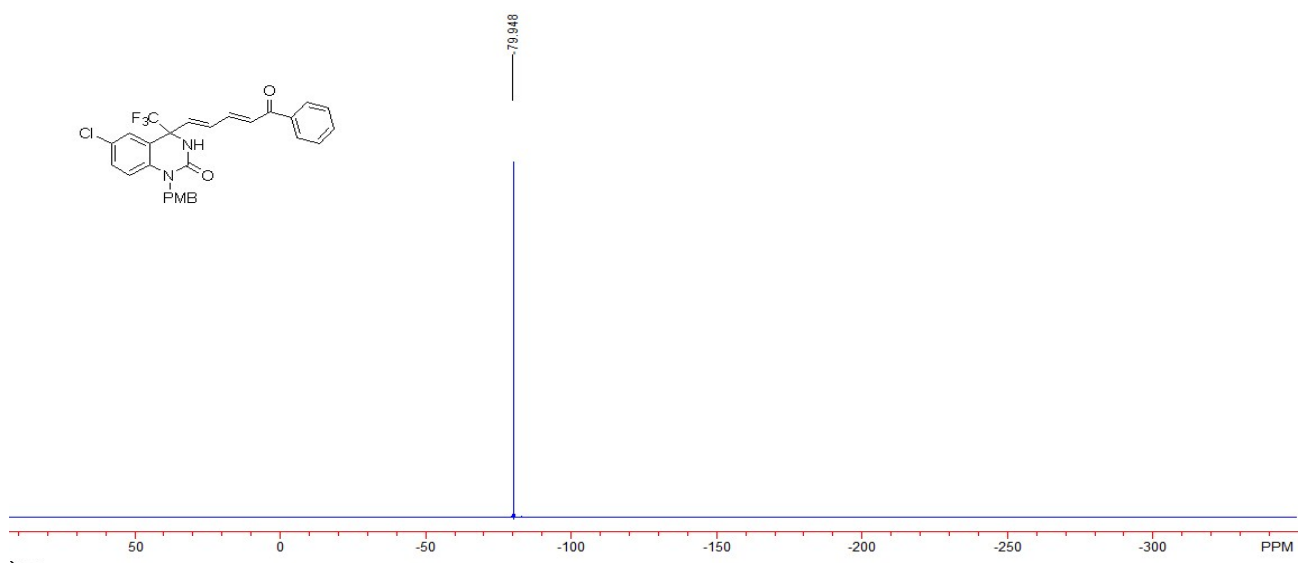

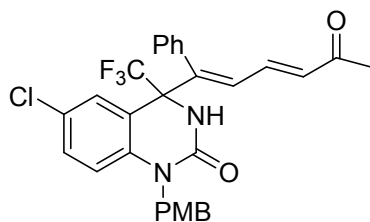

**6-chloro-1-(4-methoxybenzyl)-4-((1E,3E)-5-oxo-1-phenylhexa-1,3-dien-1-yl)-4-(trifluoromethyl)-3,4-dihydroquinazolin-2(1H)-one (3k).**

A white solid, 65% yield (70 mg). M.p.: 172-174 °C.  $^1\text{H}$  NMR ( $\text{CDCl}_3$ , TMS, 400 MHz)  $\delta$  2.10 (s, 3H,  $\text{CH}_3$ ), 3.76 (s, 3H,  $\text{CH}_3$ ), 4.86 (d,  $J = 16.8$  Hz, 1H,  $\text{CH}_2$ ), 5.09 (d,  $J = 16.8$  Hz, 1H,  $\text{CH}_2$ ), 6.30 (td,  $J = 6.4, 14.8$  Hz, 1H,  $=\text{CH}$ ), 6.55 (br, 1H, NH), 6.65-6.71 (m, 3H, ArH,  $=\text{CH}$ ), 6.74-6.77 (m, 2H, ArH), 6.88 (d,  $J = 8.8$  Hz, 3H, ArH,  $=\text{CH}$ ), 7.17 (dd,  $J = 2.4, 8.8$  Hz, 1H, ArH), 7.25-7.29 (m, 2H, ArH), 7.32-7.37 (m, 2H, ArH).  $^{13}\text{C}$  NMR ( $\text{CDCl}_3$ , TMS, 100 MHz)  $\delta$  27.5, 45.1, 55.2, 67.1 (q,  $J = 31.3$  Hz), 114.1, 116.4, 116.6, 124.5 (q,  $J = 287.0$  Hz), 127.3, 127.4, 128.2, 128.4, 129.4, 130.3, 130.6, 134.3, 136.7, 138.6, 145.3, 158.7, 198.0.  $^{19}\text{F}$  NMR (376 MHz,  $\text{CDCl}_3$ ,  $\text{CFCl}_3$ )  $\delta$  -73.31. IR ( $\text{CH}_2\text{Cl}_2$ )  $\nu$  3205, 3080, 2959, 2922, 2849, 1675, 1601, 1512, 1425, 1392, 1248, 1174, 1091, 1066, 1028, 805, 737, 705  $\text{cm}^{-1}$ . MS (ESI)  $m/z$  (%): 541.2 (100)  $[\text{M}+\text{H}]^+$ ; HRMS (ESI) Calcd. For  $\text{C}_{29}\text{H}_{25}\text{ClF}_3\text{N}_2\text{O}_3$   $^+1(\text{M}+\text{H})^+$  requires 541.1500, Found: 541.1500.

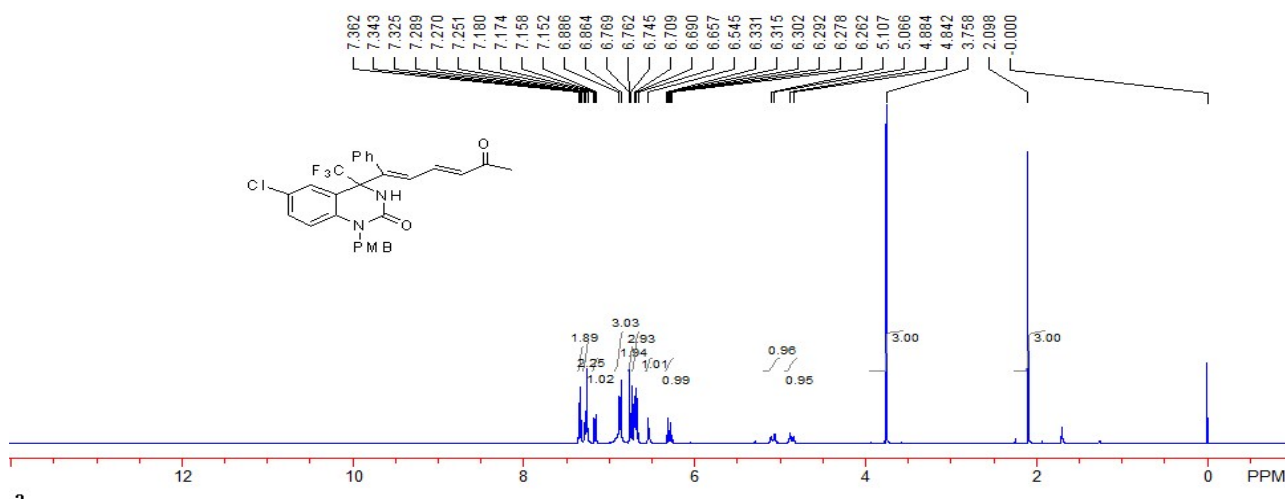

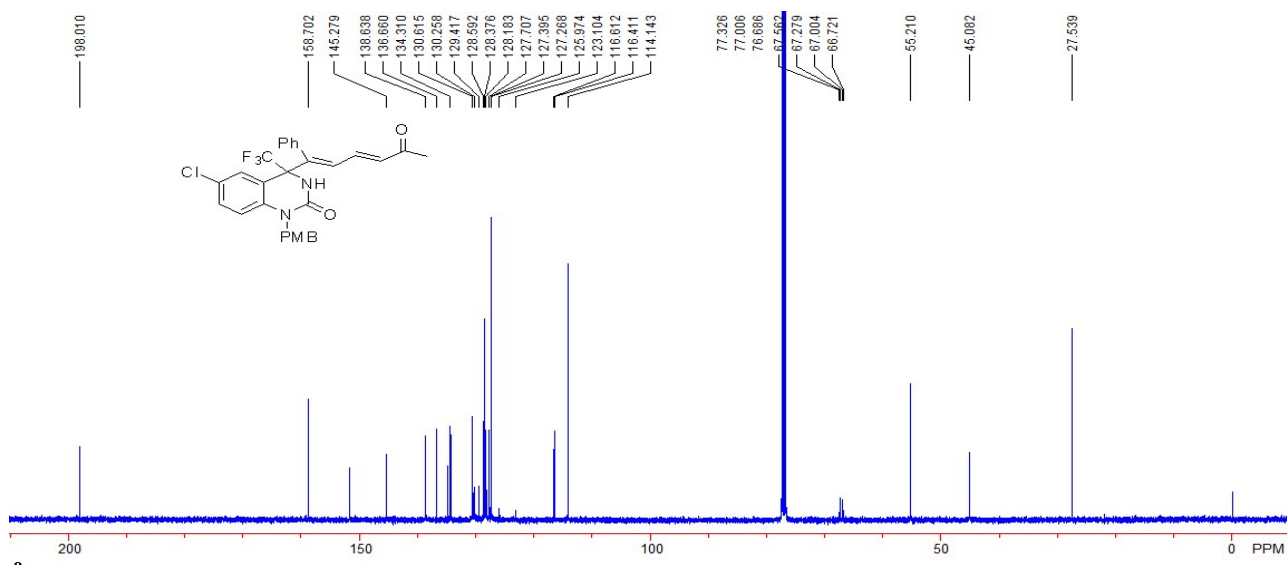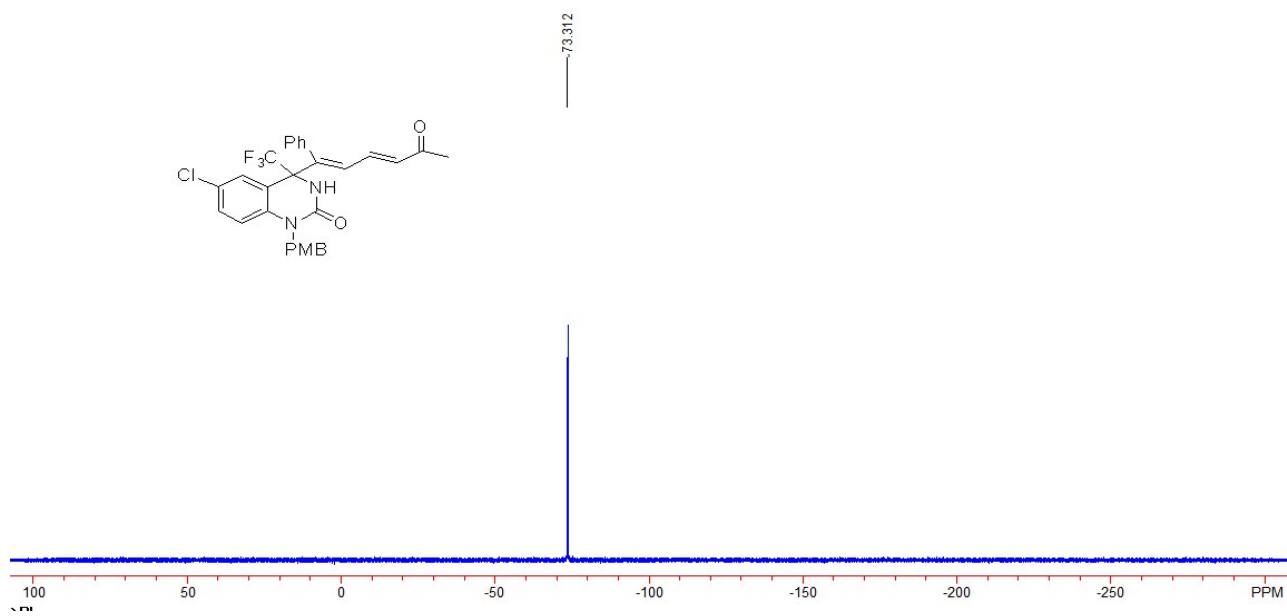

### Control Experiments and Spectroscopic Data of the Products.

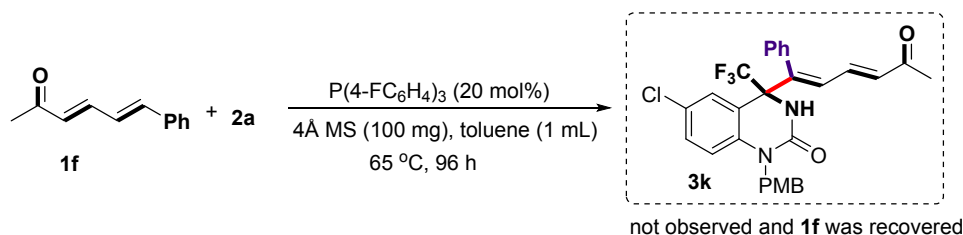

The 4Å MS was added to a Schlenk tube and heated under vacuum to remove ambient moisture and water, then filled with argon. After the Schlenk tube was returned to room temperature, cyclic trifluoromethyl ketimine **2a** (0.2 mmol) and P(4-FC<sub>6</sub>H<sub>4</sub>)<sub>3</sub> (13 mg, 0.04 mmol) were added. Under argon atmosphere, to a solution of cyclic trifluoromethyl ketimines **2a** (0.2 mmol) and P(4-FC<sub>6</sub>H<sub>4</sub>)<sub>3</sub> (13 mg, 0.04 mmol) in toluene (1.0 mL) was added the (3E,5E)-6-phenylhexa-3,5-dien-2-one **1f** (0.8 mmol) at room temperature. Then the resulting mixture was heated to 65 °C and continued stirring at 65 °C for 96 hours. Product **3k** was not obtained and **1f** was recovered.

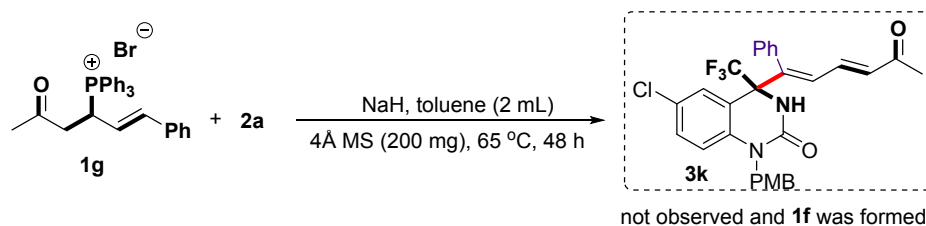

NaH (2.0 equiv) was added slowly into a solution of the phosphonium salt **1g** (2.0 equiv) and cyclic trifluoromethyl ketimine **2a** (0.20 mmol) in toluene (2 mL) at room temperature. After stirring the mixture at 65 °C for 48 h, the solvent was evaporated under reduced pressure. Product **3k** was not obtained and **1f** was formed.

Compound **1g** was prepared following a slightly modified literature procedure.<sup>[4]</sup>

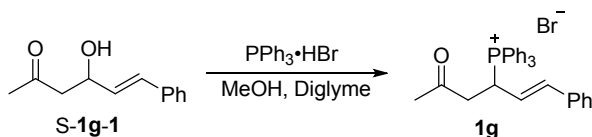

S-**1g-1** (4 mmol) was dissolved in a mixture of MeOH (5 mL) and Diglyme (5 mL) followed by addition of triphenylphosphine hydrobromide, and the resulting mixture was stirred overnight. After the reaction completed, most of the solvent was removed by vacuum evaporation, then Et<sub>2</sub>O (20 mL)

was added. The crude solid product containing small amount of triphenylphosphine hydrobromide was obtained by filtration.

$^{31}\text{P}$  NMR (121 MHz,  $\text{CDCl}_3$ )  $\delta$  24.0; HRMS (ESI) Calcd. For  $\text{C}_{30}\text{H}_{28}\text{OP}^+\text{[M-Br]}^+$  requires 435.1872, Found: 435.1874.

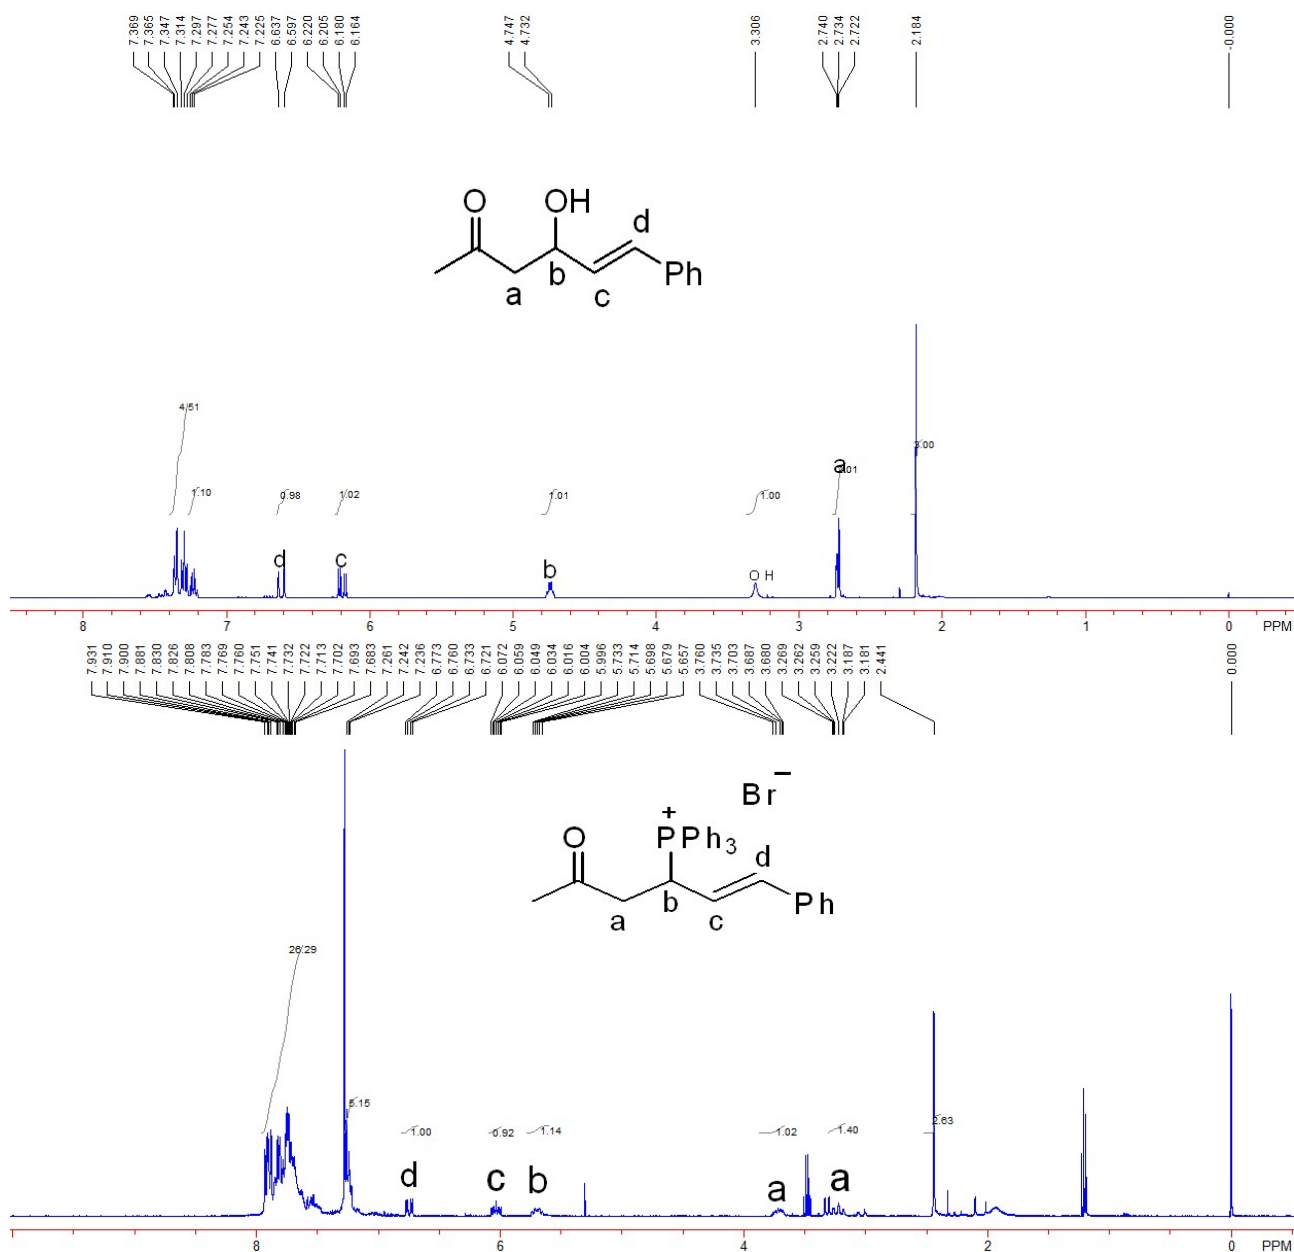

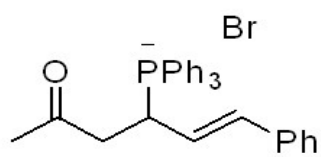

23.974

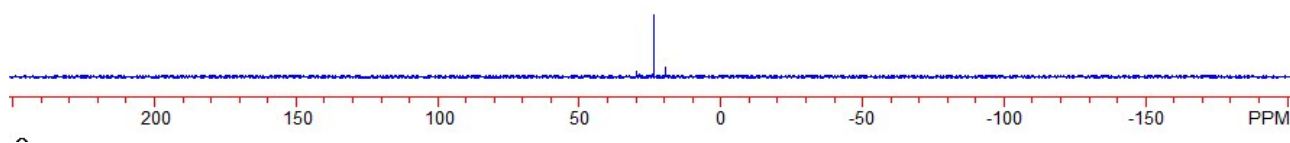

## Large-scale Testing and Transformations of Product 3a and Spectroscopic Data of the Products.

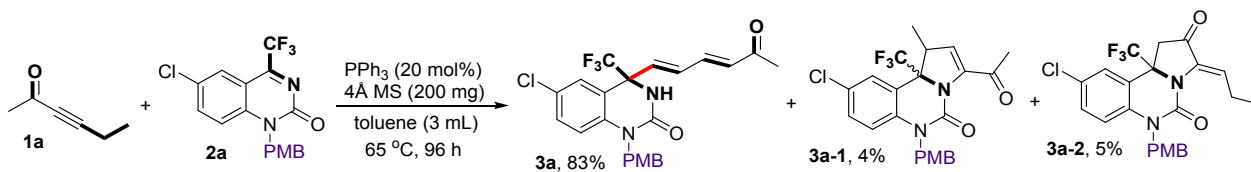

The used 4Å MS (200 mg) was added to a Schlenk tube and was heated under vacuum to remove ambient moisture and water, then filled with argon. After the Schlenk tube was returned to room temperature, cyclic trifluoromethyl ketimine **2a** (1.0 mmol) and PPh<sub>3</sub> (53 mg, 0.2 mmol) was added, followed by addition of toluene (3.0 mL) and then hex-3-yn-2-one **1a** (4.0 mmol) was added at room temperature. Then the resulting mixture was heated to 65 °C and continued stirring at 65 °C until the reaction complete (monitoring by TLC). Then the solvent was removed under reduced pressure and the residue was directly subjected to a flash column chromatography on silica gel to afford the desired product **3a**. Products **3a-1** and **3a-2** were separated as byproducts in a very small amount. The polarity of **3a** and **3a-1** is very similar, which led to the isolation of these two compounds become very difficult.

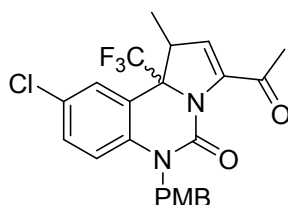

### 3-acetyl-9-chloro-6-(4-methoxybenzyl)-1-methyl-10b-(trifluoromethyl)-6,10b-dihydropyrrolo[1,2-c]quinazolin-5(1H)-one (**3a-1**).

A viscous liquid, 4% yield (19 mg). <sup>1</sup>H NMR (CDCl<sub>3</sub>, TMS, 400 MHz) δ 1.66 (d, *J* = 6.8 Hz, 3H, CH<sub>3</sub>), 2.56 (s, 3H, CH<sub>3</sub>), 3.77 (s, 3H, CH<sub>3</sub>), 4.92 (d, *J* = 16.8 Hz, 1H, CH<sub>2</sub>), 5.02-5.08 (m, 1H, CH), 5.22 (d, *J* = 16.8 Hz, 1H, CH<sub>2</sub>), 6.78 (d, *J* = 8.8 Hz, 1H, ArH), 6.84 (d, *J* = 8.8 Hz, 1H, ArH), 7.14-7.19 (m, 3H, ArH, =CH), 7.25 (d, *J* = 2.0 Hz, 1H, ArH), 7.92 (d, *J* = 2.0 Hz, 1H, ArH). <sup>13</sup>C NMR (CDCl<sub>3</sub>, TMS, 100 MHz) δ 19.3, 28.9, 46.4, 55.2, 62.2, 73.6 (d, *J* = 32.7 Hz), 114.1, 115.9, 119.0, 119.6, 123.9 (q, *J* = 287.8 Hz), 127.8, 128.2, 128.7, 130.0, 136.3, 139.2, 151.4, 152.6, 158.7, 194.0. <sup>19</sup>F NMR (376 MHz, CDCl<sub>3</sub>, CFCI<sub>3</sub>) δ -75.81. IR (CH<sub>2</sub>Cl<sub>2</sub>) ν 2984, 2363, 1673, 1615, 1514, 1390, 1246, 1189, 1174, 1033, 808, 718 cm<sup>-1</sup>. MS (ESI) *m/z* (%): 487.0 (100) [M+Na]<sup>+</sup>; HRMS (ESI)

Calcd. For  $C_{23}H_{21}F_3N_2ClO_3^{+1}(M+H)^+$  requires 465.1187, Found: 465.1186.

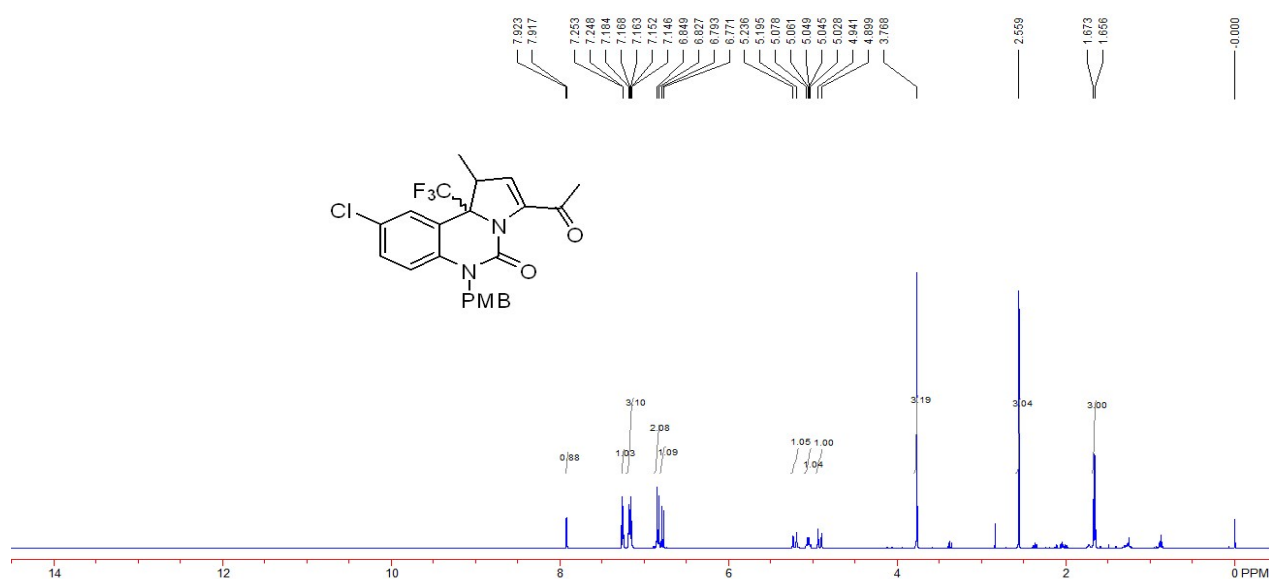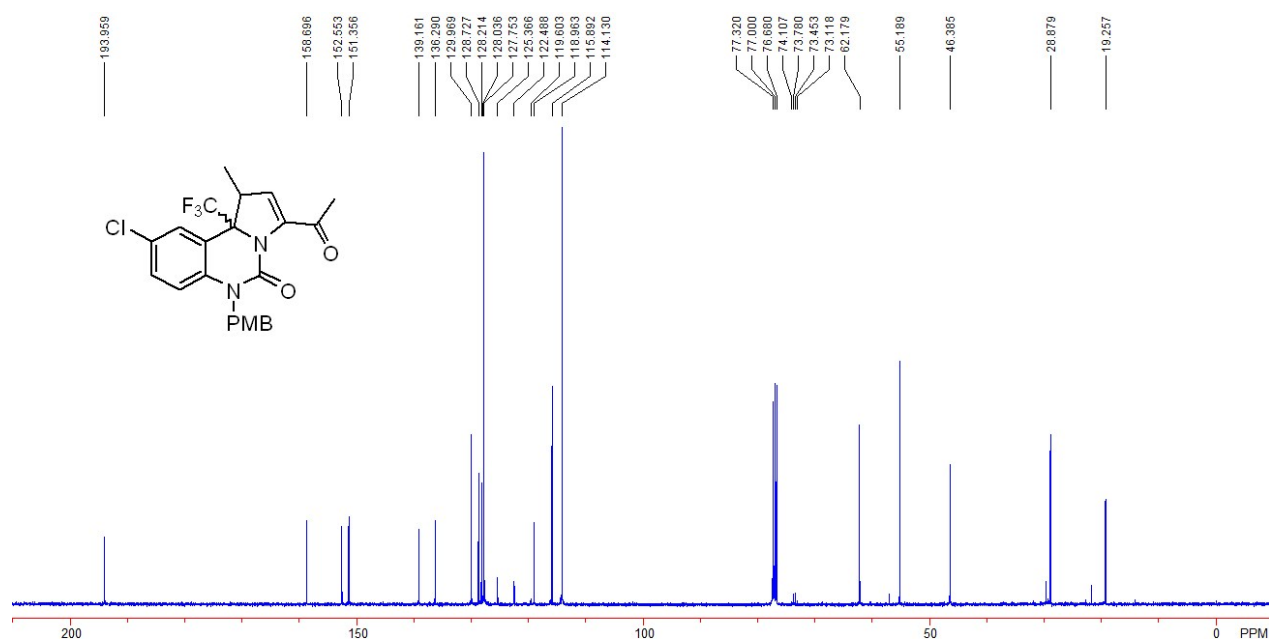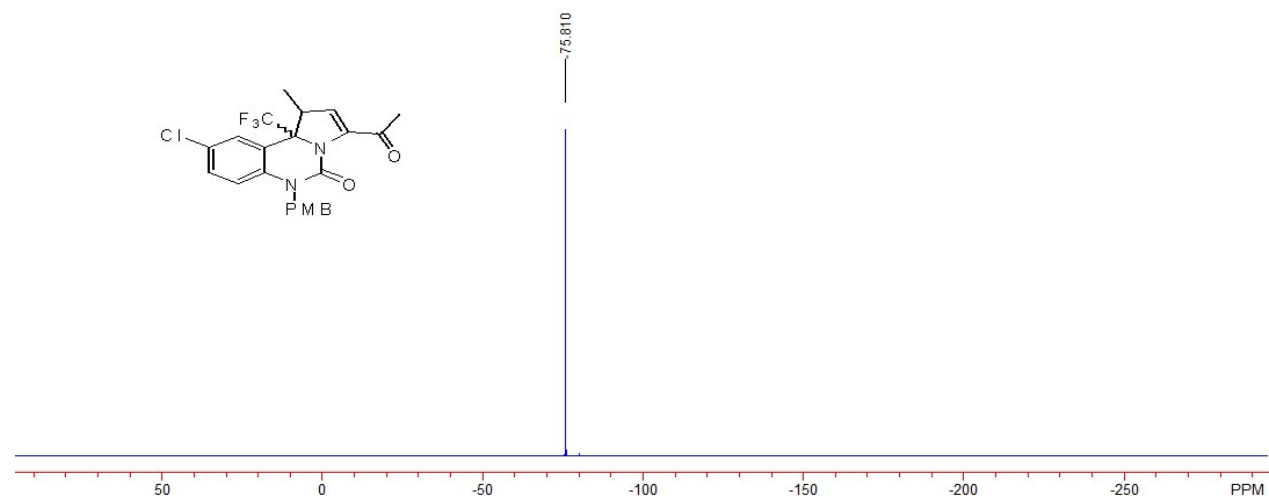

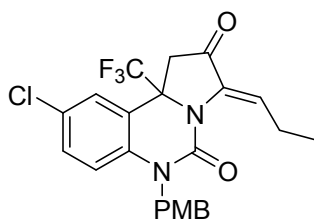

**2-chloro-8-ethyl-5-(4-methoxybenzyl)-11a-(trifluoromethyl)-11,11a-dihydro-6H-pyrido[1,2-c]quinazoline-6,10(5H)-dione (3a-2).**

A viscous liquid, 5% yield (23 mg).  $^1\text{H}$  NMR ( $\text{CDCl}_3$ , TMS, 400 MHz)  $\delta$  1.10 (t,  $J$  = 8.0 Hz, 3H,  $\text{CH}_3$ ), 2.67-2.89 (m, 2H,  $\text{CH}_2$ ), 3.05 (d,  $J$  = 18.0 Hz, 1H,  $\text{CH}_2$ ), 3.28 (d,  $J$  = 18.0 Hz, 1H,  $\text{CH}_2$ ), 3.78 (s, 3H,  $\text{CH}_3$ ), 5.07-5.17 (m, 2H,  $\text{CH}_2$ ), 6.83-6.87 (m, 3H, ArH), 7.14-7.24 (m, 4H, ArH), 7.92 (dd,  $J$  = 8.0, 8.0 Hz, 1H, ArH).  $^{13}\text{C}$  NMR ( $\text{CDCl}_3$ , TMS, 100 MHz)  $\delta$  14.1, 19.8, 43.4, 46.6, 55.2, 63.7 (d,  $J$  = 29.6 Hz), 114.3, 116.2, 119.3, 120.6, 124.9 (q,  $J$  = 289.2 Hz), 126.9, 127.6, 127.9, 128.2, 129.3, 130.8, 131.28, 131.34, 136.8, 150.4, 158.9, 193.7.  $^{19}\text{F}$  NMR (376 MHz,  $\text{CDCl}_3$ ,  $\text{CFCl}_3$ )  $\delta$  -80.77. IR ( $\text{CH}_2\text{Cl}_2$ )  $\nu$  2970, 2933, 2357, 2336, 1677, 1514, 1500, 1384, 1177, 1065, 998  $\text{cm}^{-1}$ . MS (ESI)  $m/z$  (%): 486.9 (100)  $[\text{M}+\text{Na}]^+$ ; HRMS (ESI) Calcd. For  $\text{C}_{23}\text{H}_{21}\text{F}_3\text{N}_2\text{ClO}_3$   $^+1(\text{M}+\text{H})^+$  requires 465.1187, Found: 465.1182.

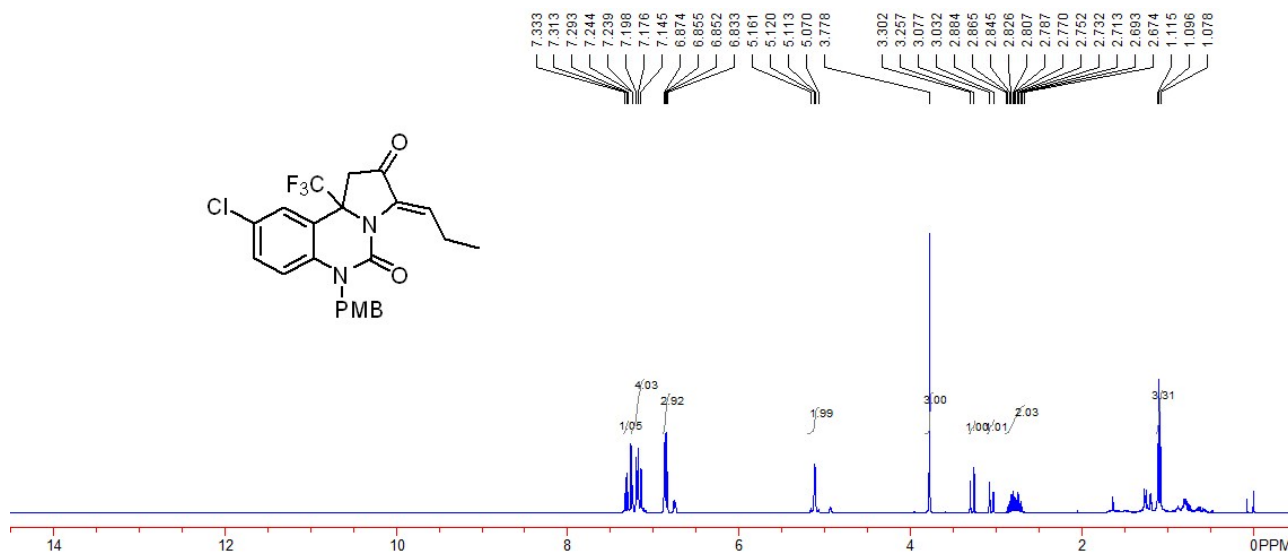

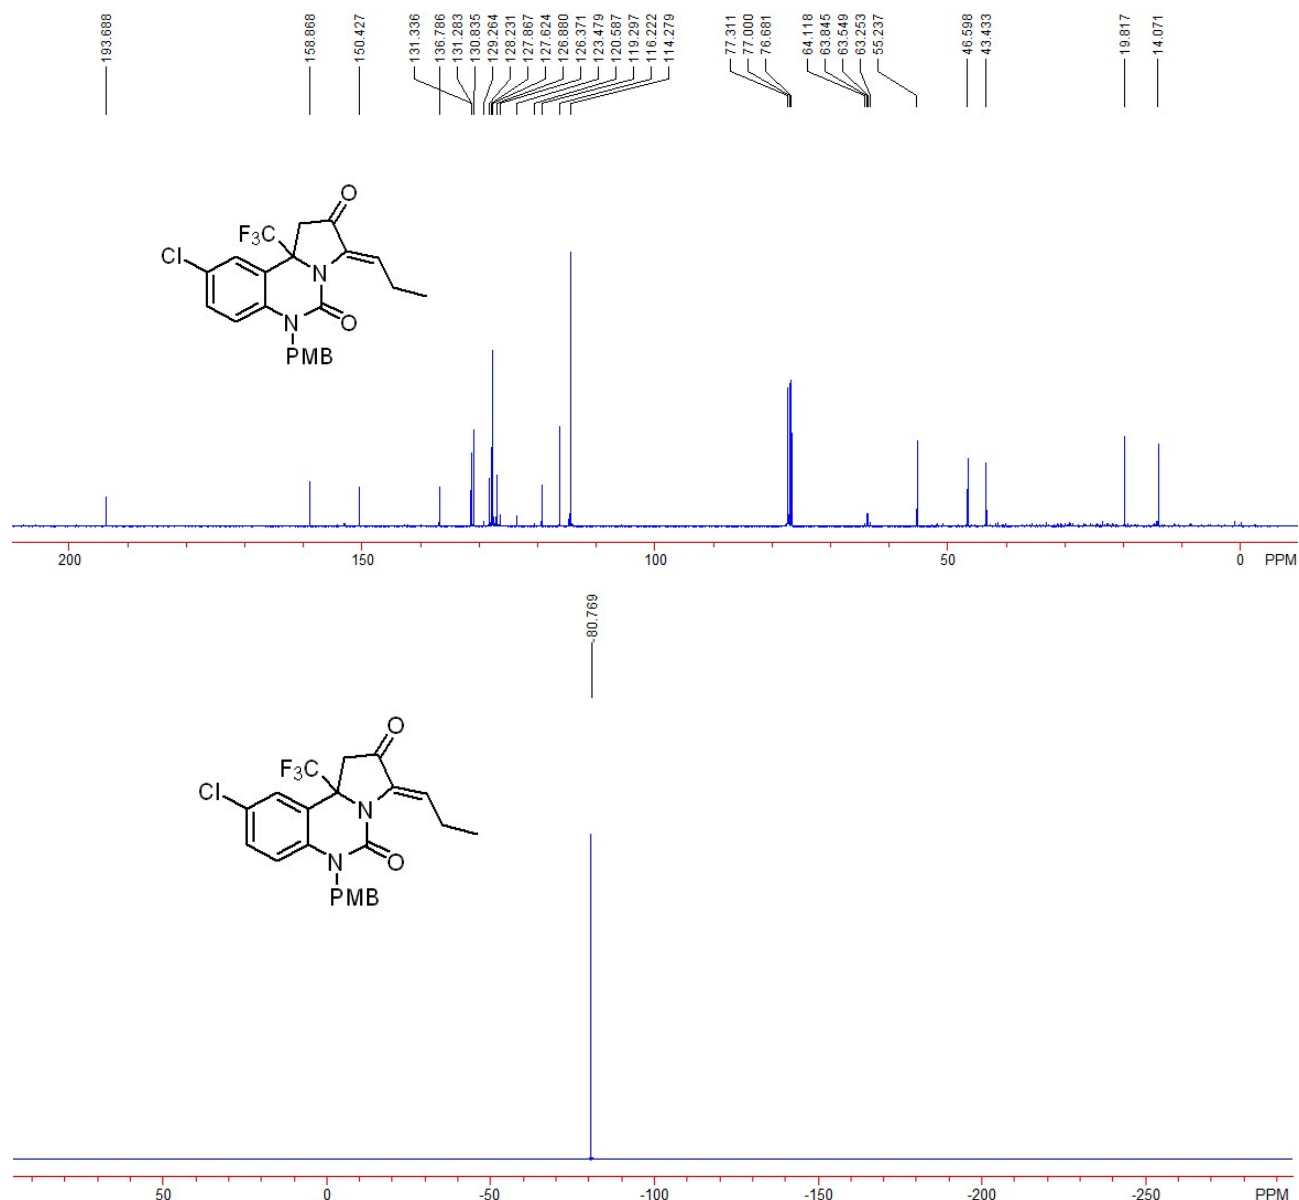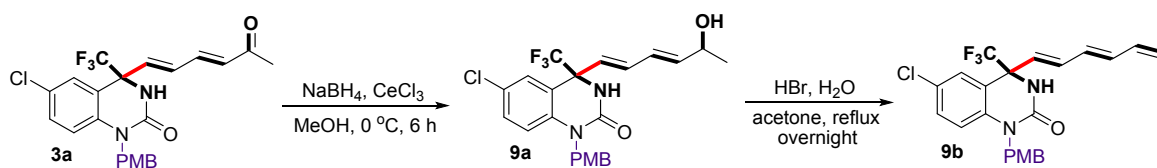

Under argon atmosphere, to a solution of **3a** (0.2 mmol) in methanol (2.0 mL) was added  $\text{CeCl}_3$  (0.2 mmol) at  $0^\circ\text{C}$ . After 10 minutes,  $\text{NaBH}_4$  (0.3 mmol) was added to the resulting mixture and continued to stir for another 15 minutes at  $0^\circ\text{C}$ . Then the reaction mixture was allowed to rise to room temperature. After 4 hours, the solvent was removed under reduced pressure and the residue was directly subjected to a flash column chromatography on silica gel to afford the desired product **9a**.

**9a** (0.178 mmol) was dissolved in acetone/H<sub>2</sub>O (4.32 mL/25  $\mu$ L) and was heated to reflux, followed by addition of HBr (10  $\mu$ L). The reaction mixture was under reflux overnight. After return to room temperature, trace amount of saturated sodium carbonate solution was added into the reaction mixture to quench the reaction. The solvent was removed under reduced pressure and the residue was directly subjected to a flash column chromatography on silica gel to afford the desired product **9b**.

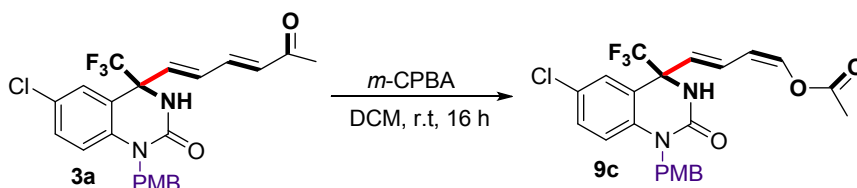

Under argon atmosphere, to a solution of **3a** (0.2 mmol) in dichloromethane (1.0 mL) was added CeCl<sub>3</sub> (0.2 mmol) at 0 °C. After 10 minutes, *m*-CPBA (0.26 mmol) was added to the resulting mixture and continued to stir for another 15 minutes at the 0 °C. Then the reaction mixture was allowed to rise to room temperature. After 4 hours, Me<sub>2</sub>S was added to quench the reaction. The solvent was removed under reduced pressure and the residue was directly subjected to a flash column chromatography on silica gel to afford the desired product **9c**.

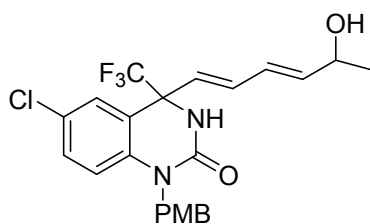

**6-chloro-4-((1E,3E)-5-hydroxyhexa-1,3-dien-1-yl)-1-(4-methoxybenzyl)-4-(trifluoromethyl)-3,4-dihydroquinazolin-2(1H)-one (9a).**

A white solid, 89% yield (83 mg). M.p.: 256-258 °C. <sup>1</sup>H NMR (CDCl<sub>3</sub>, TMS, 400 MHz)  $\delta$  1.29 (d, *J* = 6.4 Hz, 3H, CH<sub>3</sub>), 1.82 (br, 1H, OH), 3.77 (s, 3H, CH<sub>3</sub>), 4.36-4.43 (m, 1H, CH), 5.01 (d, *J* = 16.8 Hz, 1H, CH<sub>2</sub>), 5.18 (d, *J* = 16.8 Hz, 1H, CH<sub>2</sub>), 5.89 (dd, *J* = 5.6, 14.8 Hz, 1H, =CH), 6.02 (s, 1H, NH), 6.11 (d, *J* = 15.2 Hz, 1H, =CH), 6.29-6.37 (m, 1H, =CH), 6.59 (dd, *J* = 10.4, 15.2 Hz, 1H, =CH), 6.78 (d, *J* = 8.8 Hz, 1H, ArH), 6.85 (d, *J* = 8.4 Hz, 2H, ArH), 7.15-7.18 (m, 3H, ArH), 7.20

The figure displays the chemical structure of compound 10 and its corresponding <sup>1</sup>H and <sup>13</sup>C NMR spectra. The chemical structure is a 2-(4-chlorophenyl)-2-(4-(4-hydroxybut-3-en-1-yl)-2-methyl-5-oxo-2,3-dihydro-1H-benzimidazol-1-yl)-2,2-difluorobenzene derivative. The <sup>1</sup>H NMR spectrum (top) shows peaks in the aromatic region (6.1-7.2 ppm) and aliphatic region (1.2-2.1 ppm). The <sup>13</sup>C NMR spectrum (bottom) shows peaks in the aromatic region (114-158 ppm) and aliphatic region (23-77 ppm).

**<sup>1</sup>H NMR Spectrum (Top):**

- Chemical shift range: 0.00 to 7.20 ppm.
- Integration values: 1.46, 2.92, 1.96, 0.99/1.00, 0.99/1.00, 0.98/0.98, 0.99/0.98, 0.95, 3.00, 1.00, 3.08.

**<sup>13</sup>C NMR Spectrum (Bottom):**

- Chemical shift range: 23.14 to 158.81 ppm.

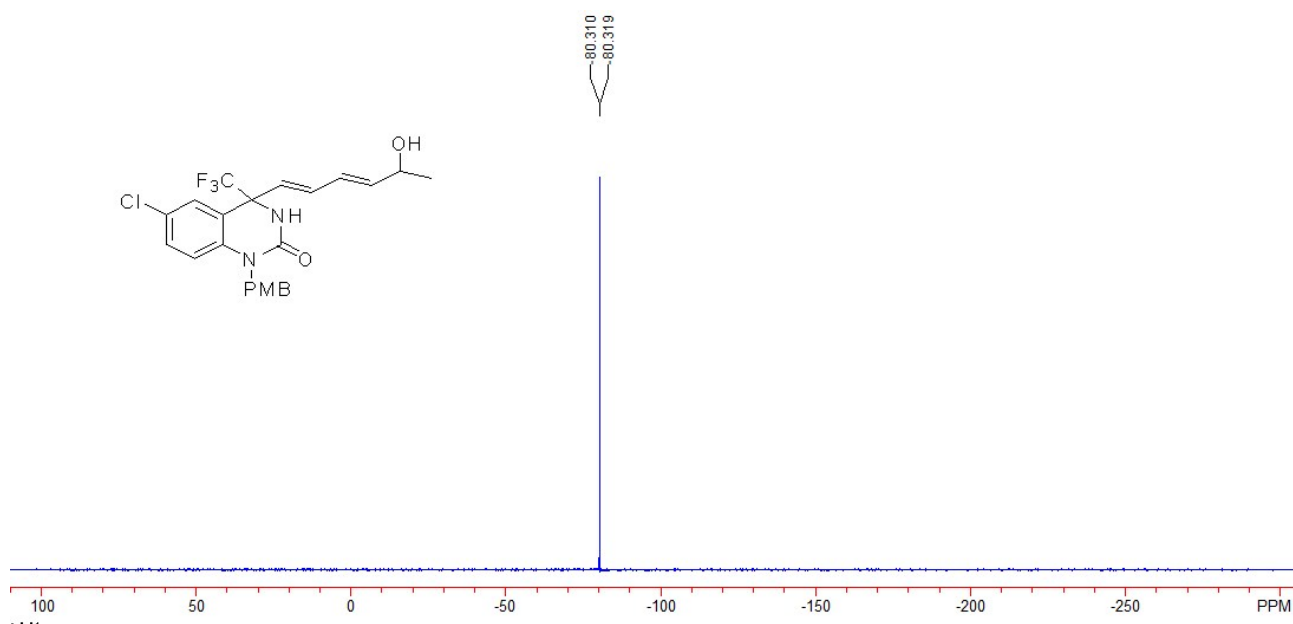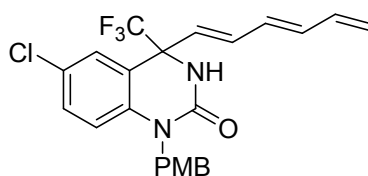

**6-chloro-4-((1E,3E)-5-hydroxyhexa-1,3-dien-1-yl)-1-(4-methoxybenzyl)-4-(trifluoromethyl)-3,4-dihydroquinazolin-2(1H)-one (9b).**

A white solid, 43% yield (34 mg). M.p.: 201-203 °C.  $^1\text{H}$  NMR ( $\text{CDCl}_3$ , TMS, 400 MHz)  $\delta$  3.77 (s, 3H,  $\text{CH}_3$ ), 5.02 (d,  $J = 16.4$  Hz, 1H,  $\text{CH}_2$ ), 5.16-5.34 (m, 3H,  $\text{CH}_2$ , =CH), 5.75 (s, 1H, NH), 6.13 (d,  $J = 15.2$  Hz, 1H, =CH), 6.32-6.45 (m, 3H, =CH), 6.62 (dd,  $J = 8.8$ , 15.6 Hz, 1H, =CH), 6.78 (d,  $J = 8.8$  Hz, 1H, ArH), 6.85 (d,  $J = 8.8$  Hz, 2H, ArH), 7.16 (d,  $J = 8.8$  Hz, 3H, ArH), 7.21 (s, 1H, Ar).  $^{13}\text{C}$  NMR ( $\text{CDCl}_3$ , TMS, 100 MHz)  $\delta$  45.6, 55.2, 62.5 (d,  $J = 1.4$  Hz), 62.3 (q,  $J = 29.2$  Hz), 114.3, 116.2, 119.8, 120.1, 124.8 (q,  $J = 286.9$  Hz), 127.0, 127.6, 127.7, 128.0, 130.2, 130.4, 135.2, 136.1, 137.3, 152.5, 158.8.  $^{19}\text{F}$  NMR (376 MHz,  $\text{CDCl}_3$ ,  $\text{CFCl}_3$ )  $\delta$  -80.28. IR ( $\text{CH}_2\text{Cl}_2$ )  $\nu$  3032, 2925, 2863, 1681, 1513, 1502, 1427, 1390, 1174, 1007, 809  $\text{cm}^{-1}$ . MS (ESI)  $m/z$  (%): 471.1 (100)  $[\text{M}+\text{Na}]^+$ ; HRMS (ESI) Calcd. For  $\text{C}_{23}\text{H}_{21}\text{ClF}_3\text{N}_2\text{O}_3$  requires 449.1238, Found: 449.1235.

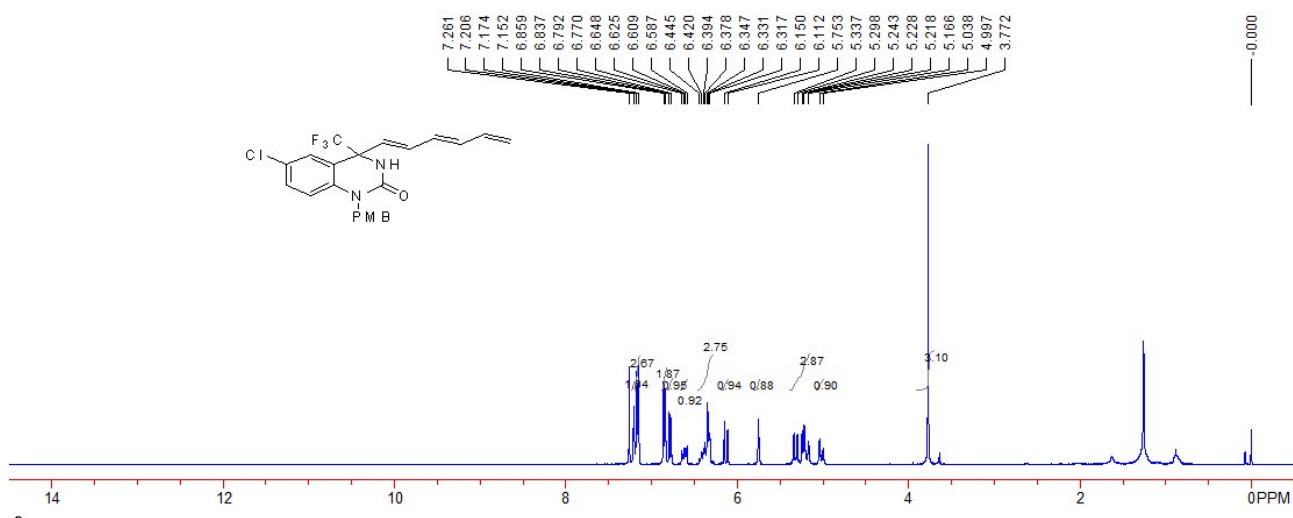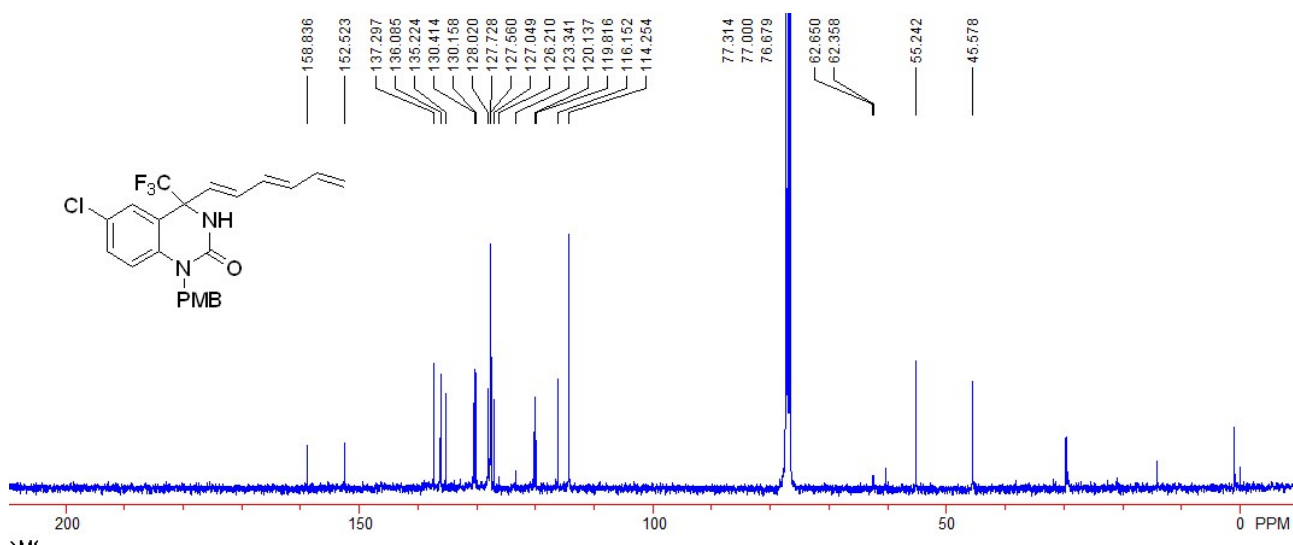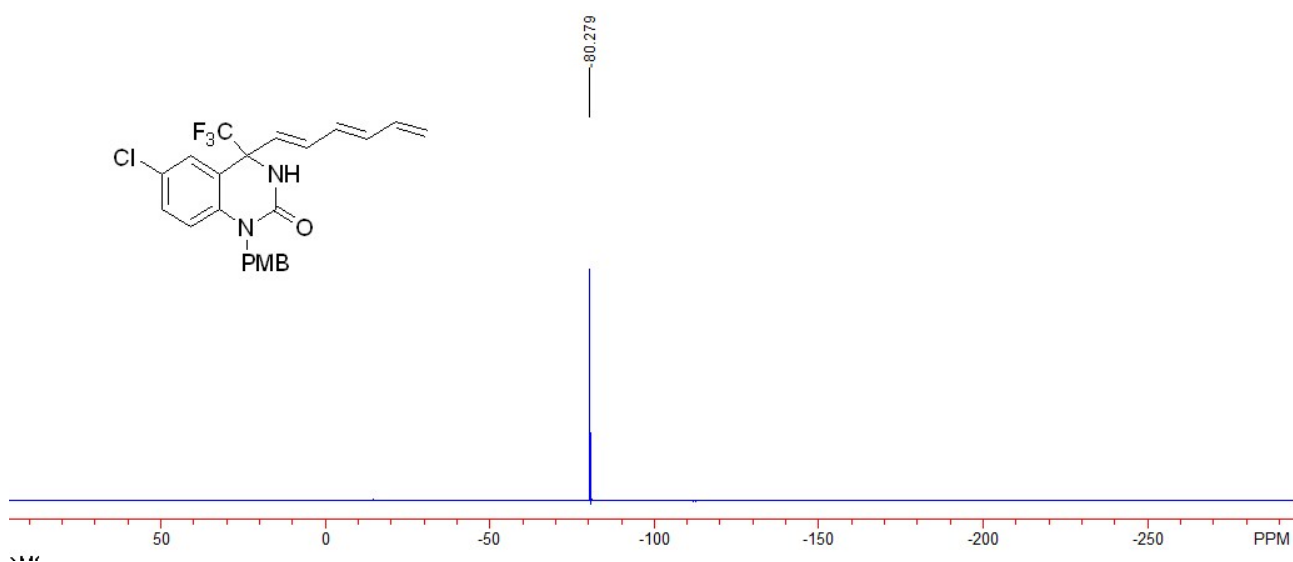

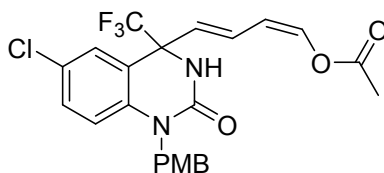

**(1Z,3E)-4-(6-chloro-1-(4-methoxybenzyl)-2-oxo-4-(trifluoromethyl)-1,2,3,4-tetrahydroquinazolin-4-yl)buta-1,3-dien-1-yl acetate (9c).**

A white solid, 53% yield (47 mg). M.p.: 157-159 °C.  $^1\text{H}$  NMR ( $\text{CDCl}_3$ , TMS, 400 MHz)  $\delta$  2.17 (s, 3H,  $\text{CH}_3$ ), 3.77 (s, 3H,  $\text{CH}_3$ ), 5.02 (d,  $J = 16.8$  Hz, 1H,  $\text{CH}_2$ ), 5.18 (d,  $J = 16.8$  Hz, 1H,  $\text{CH}_2$ ), 6.05-6.14 (m, 3H,  $=\text{CH}$ , ArH), 6.81 (dd,  $J = 11.2, 15.2$  Hz, 1H,  $=\text{CH}$ ), 6.77-6.86 (m, 3H,  $=\text{CH}$ , ArH), 7.15-7.20 (m, 4H,  $=\text{CH}$ , NH, ArH), 7.48 (d,  $J = 12.4$  Hz, 1H,  $=\text{CH}$ ).  $^{13}\text{C}$  NMR ( $\text{CDCl}_3$ , TMS, 100 MHz)  $\delta$  20.6, 45.5, 55.2, 62.5 (d,  $J = 29.0$  Hz), 114.2, 116.2, 119.8, 124.8 (q,  $J = 287.0$  Hz), 126.6, 127.6, 127.7, 128.0, 128.1, 130.1, 130.8, 136.3, 141.3, 152.7, 152.8, 167.4.  $^{19}\text{F}$  NMR (376 MHz,  $\text{CDCl}_3$ ,  $\text{CFCl}_3$ )  $\delta$  -80.27. IR ( $\text{CH}_2\text{Cl}_2$ )  $\nu$  2958, 2923, 2358, 2332, 1763, 1681, 1427, 1210, 1109, 1038, 895, 741  $\text{cm}^{-1}$ . MS (ESI)  $m/z$  (%): 481.1 (100)  $[\text{M}+\text{H}]^+$ ; HRMS (ESI) Calcd. For  $\text{C}_{23}\text{H}_{21}\text{F}_3\text{N}_2\text{ClO}_4 + 1(\text{M}+\text{H})^+$  requires 481.1142, Found: 481.1097.

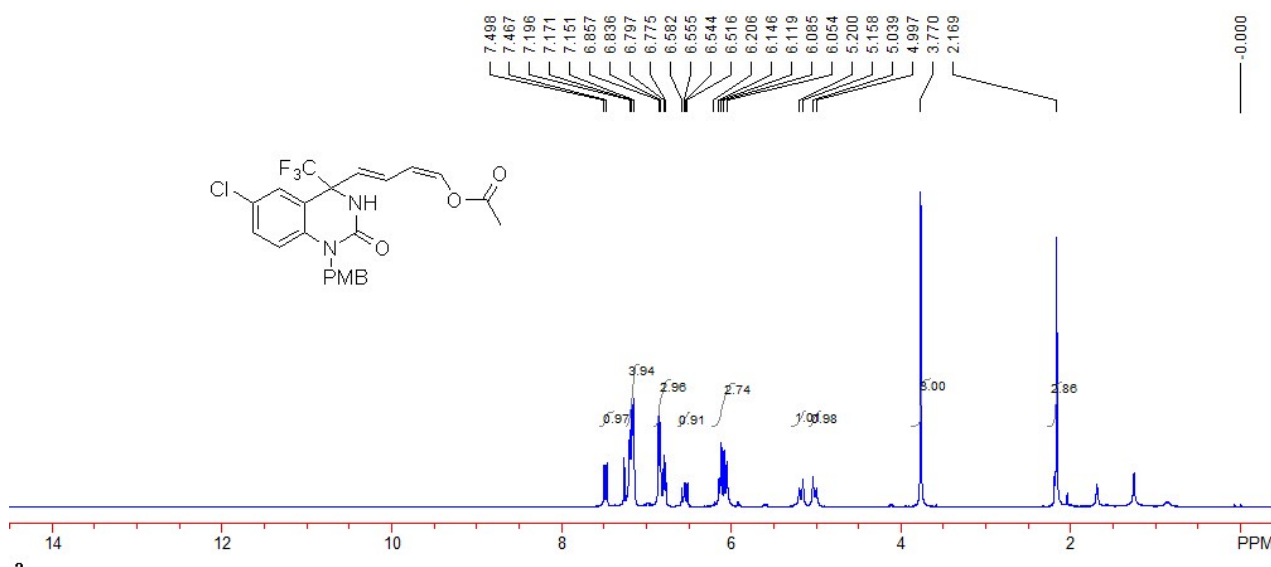

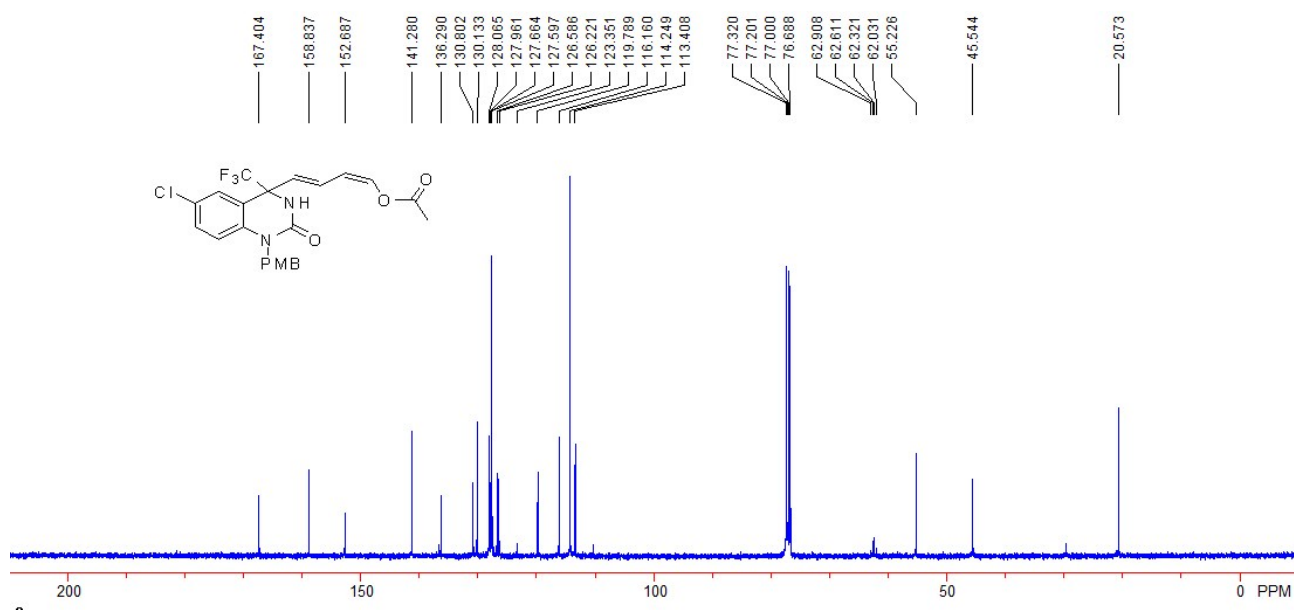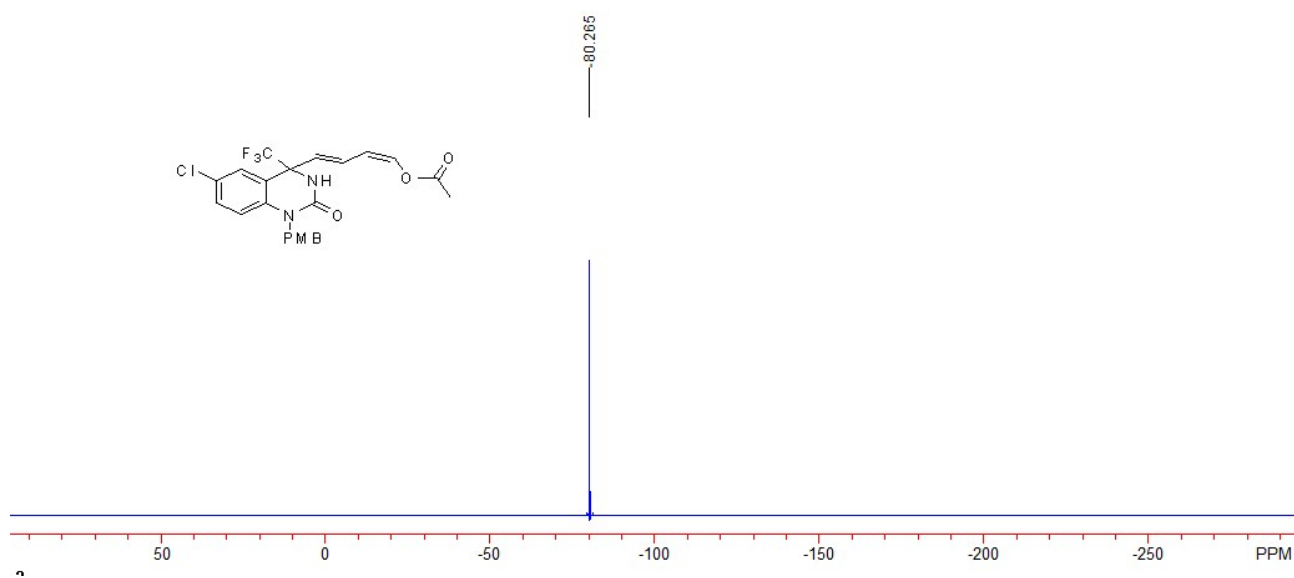

### X-ray Crystal Data of **3a** and **5a**.

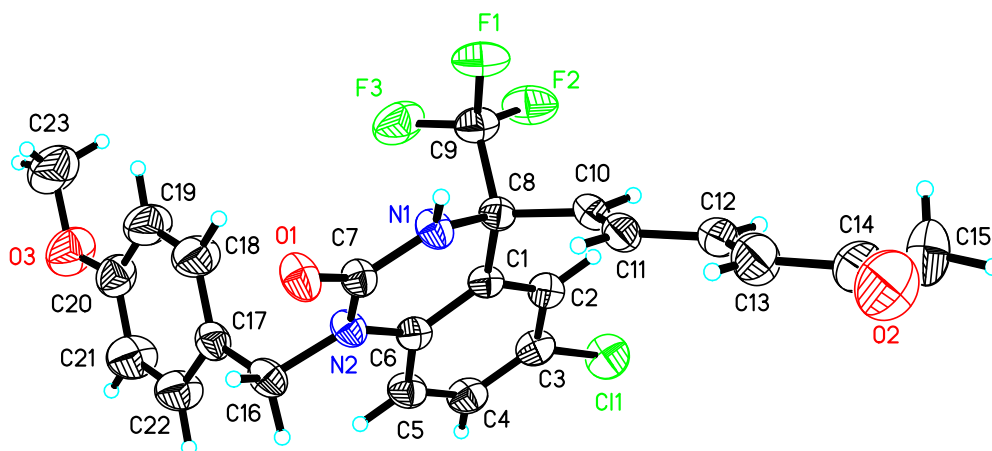

The crystal data of **3a** have been deposited in CCDC with number 1005236. Empirical Formula:  $C_{23}H_{20}ClF_3N_2O_3$ ; Formula Weight: 464.86; Crystal Color, Habit: colorless; Crystal Dimensions: 0.211 x 0.175 x 0.112 mm<sup>3</sup>; Crystal System: Orthorhombic; Lattice Parameters:  $a = 18.1727(15)$  Å,  $\alpha = 90$  deg.  $b = 10.5743(9)$  Å,  $\beta = 90$  deg.  $c = 23.8130(19)$  Å,  $\gamma = 90$  deg.;  $V = 4576.0(7)$  Å<sup>3</sup>; Space group:  $Pbca$ ;  $Z = 8$ ;  $D_{calc} = 1.350$  g/cm<sup>3</sup>;  $F_{000} = 1920$ ; Diffractometer: Rigaku AFC7R; Residuals:  $R$ ;  $R_w$ : 0.0596, 0.1255.

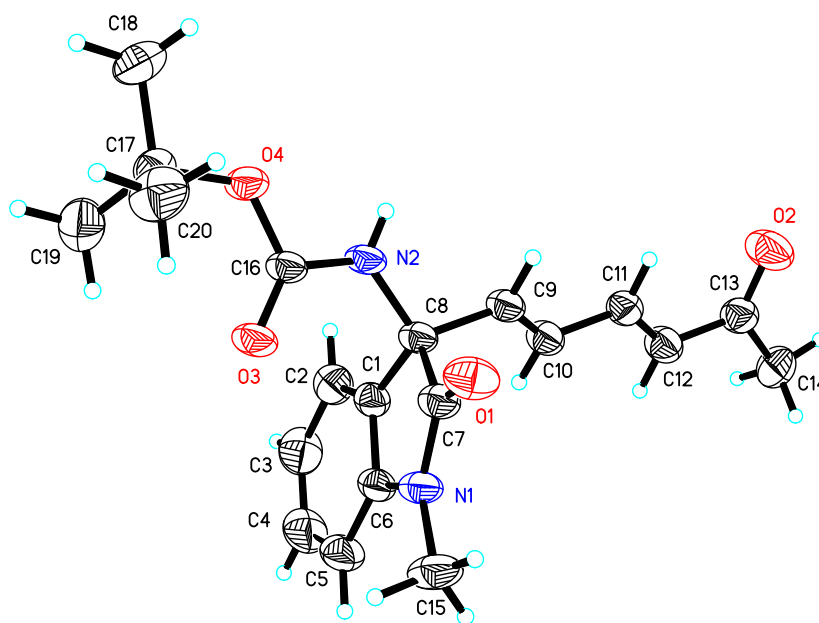

The crystal data of **5a** have been deposited in CCDC with number 1011176. Empirical Formula:  $C_{20}H_{24}N_2O_4$ ; Formula Weight: 356.41; Crystal Color, Habit: colorless; Crystal Dimensions: 0.211 x 0.156 x 0.123 mm<sup>3</sup>; Crystal System: Monoclinic; Lattice Parameters:  $a = 18.416(5)$  Å,  $\alpha = 90$  deg.  $b = 11.310(3)$  Å,  $\beta = 93.907(7)$  deg.  $c = 9.759(3)$  Å,  $\gamma = 90$  deg.;  $V = 2027.9(10)$  Å<sup>3</sup>; Space group: P 21/c;  $Z = 4$ ;  $D_{calc} = 1.167$  g/cm<sup>3</sup>;  $F_{000} = 760$ ; Diffractometer: Rigaku AFC7R; Residuals:  $R$ ;  $R_w$ : 0.0457, 0.1271.

## References:

1. (a) O. Lifchits, M. Mahlau, C. M. Reisinger, A. Lee, C. Farès, I. Polyak, G. Gopakumar, W. Thiel and B. List, *J. Am. Chem. Soc.*, 2013, **135**, 6677; (b) D.-Y. Li, Y. Wei and M. Shi, *Eur. J. Org. Chem.*, 2015, **2015**, 4108.
2. (a) S. Takizawa, F. A. Arteaga, Y. Yoshida, M. Suzuki and H. Sasai, *Org. Lett.*, 2013, **15**, 4142; (b) K. Kato, H. Nakamura and K. Nakanishi, *Appl. Surf. Sci.*, 2014, **293**, 312; (c) S. Nakamura, S. Takahashi, D. Nakane and H. Masuda, *Org. Lett.*, 2015, **17**, 106; (d) X. Ren and H. Du, *J. Am. Chem. Soc.*, 2016, **138**, 810.
3. N. A. Magnus, P. N. Confalone, L. Storace, M. Patel, C. C. Wood, W. P. Davis and R. L. Parsons, *J. Org. Chem.*, 2003, **68**, 754.
4. G. E. Magoulas, S. E. Bariamis, C. M. Athanassopoulos, A. Haskopoulos, P. G. Dedes, M. G. Krokidis, N. K. Karamanos, D. Kletsas, D. Papaioannou and G. Maroulis, *Eur. J. Med. Chem.*, 2011, **46**, 721.
